# Supplementary material for: Selective synthesis of 3-formylbenzofuran and 3-acylbenzofuran using a chalcone rearrangement strategy
Source: Royal Society of Chemistry journal article supplement (doi:10.1039/d2ra06080a), 2022-01-01

# Supporting Information

## Selective synthesis of 3-formylbenzofurans and 3-acylbenzofurans using a chalcone rearrangement strategy

Akira Nakamura, Akira Imamiya, Yuichiro Ikegami, Fei Rao, Harumi Yuguchi, Yasuyoshi Miki and Tomohiro Maegawa\*

School of Pharmaceutical Sciences, Kindai University, 3-4-1 Kowakae, Higashi-osaka, Osaka 577-8502, Japan.

### Table of Content

|                                                    |            |
|----------------------------------------------------|------------|
| Experimental Procedures and Data                   | <b>S2</b>  |
| References                                         | <b>S13</b> |
| <sup>1</sup> H NMR and <sup>13</sup> C NMR Spectra | <b>S14</b> |
| High Resolution Mass Spectra and Data              | <b>S55</b> |

## Experimental Section

All chemicals were obtained from Sigma Aldrich, TCI, Nakalai Chemical or Fujifilm Wako chemical as reagent grade and were used as received. TLC were performed on Merck Silica gel F254 plates (0.25 mm).  $^1\text{H}$  and  $^{13}\text{C}$  NMR spectra were recorded on the JEOL JMN-400 or Bruker AVANCE III 600 spectrometers in  $\text{CDCl}_3$ ,  $\text{DMSO-}d_6$  or MeOD. Chemical shifts are expressed in ppm ( $\delta$ ) and coupling constants ( $J$ ) are in hertz (Hz). Standard abbreviations were used for defining signal multiplicities. High-resolution mass spectra were measured by SHIMAZU IRAffinity-1 instrument (FABMS) or Exactive Plus mass spectrometer (Thermo Fisher Scientific Inc.) (ESIMS).

### General procedure for synthesis of chalcone

To the solution of aldehyde (1 equiv.) and acetophenone (1-2 equiv.) in MeOH (0.2-0.5 M) was added NaOH (3 equiv.) and then stirred at room temperature. The organic layer was extracted with AcOEt, washed with brine, dried over with  $\text{Na}_2\text{SO}_4$  and concentrated under the reduced pressure. The residue was purified by  $\text{SiO}_2$  column chromatography (eluent: Hexane/AcOEt) to give the desired chalcone.

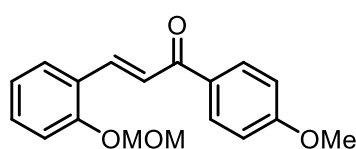

### (*E*)-3-(2-(Methoxymethoxy)phenyl)-1-(4-methoxyphenyl)prop-2-en-1-one

(**1a**)

According to the general procedure, the reaction of aldehyde (720 mg, 4.3 mmol) and 4'-methoxyacetophenone (646 mg, 4.3 mmol) with NaOH (516 mg, 12.9 mmol) in MeOH (7.2 mL) gave **1a** (1.22 g, 95%) as yellow solid. Reaction time: 22 h. Eluent of  $\text{SiO}_2$  column chromatography: Hexane/AcOEt = 4/1.

$^1\text{H-NMR}$  ( $\text{CDCl}_3$ )  $\delta$ : 8.18 (d,  $J = 15.6$  Hz, 1H), 8.05 (d,  $J = 8.8$  Hz, 2H), 7.68 (dd,  $J = 7.6, 2.0$  Hz, 1H), 7.61 (d,  $J = 15.6$  Hz, 1H), 7.35 (td,  $J = 7.6, 1.6$  Hz, 1H), 7.18 (d,  $J = 7.6$  Hz, 1H), 7.05 (t,  $J = 7.6$  Hz, 1H), 6.99 (d,  $J = 8.8$  Hz, 2H), 5.29 (s, 2H), 3.89 (s, 3H), 3.51 (s, 3H);  $^{13}\text{C}$  NMR (100 MHz,  $\text{CDCl}_3$ )  $\delta$  188.8, 163.3, 156.3, 138.8, 131.4, 131.2, 130.7, 128.2, 124.7, 122.3, 121.8, 114.8, 113.7, 94.4, 56.1, 55.2; HRMS (FAB) calcd for  $\text{C}_{18}\text{H}_{18}\text{O}_4$  [ $\text{M}$ ] $^+$ : 298.1205, found 298.1212.

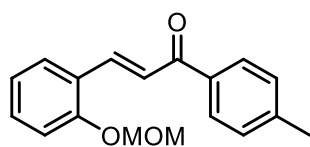

### (*E*)-3-(2-(Methoxymethoxy)phenyl)-1-(*p*-tolyl)prop-2-en-1-one (**1b**)

According to the general procedure, the reaction of aldehyde (400 mg, 2.4 mmol) and 4'-metylacetophenone (720 mg, 4.3 mmol) with NaOH (288 mg, 7.2 mmol) in MeOH (4.5 mL) gave **1b** (580 mg, 93%) as yellow oil. Reaction time: 1 h. Eluent of  $\text{SiO}_2$  column chromatography: Hexane/AcOEt = 4/1.

$^1\text{H}$  NMR (400 MHz,  $\text{CDCl}_3$ )  $\delta$ : 8.18 (d,  $J = 16.0$  Hz, 1H), 7.95 (d,  $J = 8.0$  Hz, 2H), 7.68 (d,  $J = 7.6$  Hz, 1H), 7.61 (d,  $J = 16.0$  Hz, 1H), 7.36 (t,  $J = 7.2, 1.2$  Hz, 1H), 7.30 (d,  $J = 8.0$  Hz, 2H), 7.18 (d,  $J = 8.4$  Hz, 1H), 7.05 (t,  $J = 7.6$  Hz, 1H), 5.28 (s, 2H), 3.51 (s, 3H), 2.44 (s, 3H);  $^{13}\text{C}$  NMR (100 MHz,  $\text{CDCl}_3$ )  $\delta$  190.6, 156.6, 143.7, 139.7, 136.0, 131.8, 129.5, 128.8, 128.6, 124.9, 122.9, 122.1, 115.0, 94.7, 21.7; HRMS (FAB) calcd for  $\text{C}_{18}\text{H}_{18}\text{O}_3$  [ $\text{M}$ ] $^+$ : 282.1256, found 282.1255.

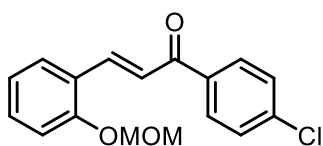

**(E)-1-(4-Chlorophenyl)-3-(2-(methoxymethoxy)phenyl)prop-2-en-1-one (1c)**

According to the general procedure, the reaction of aldehyde (331 mg, 2.0 mmol) and 4'-chloroacetophenone (338 mg, 2.2 mmol) with NaOH (394 mg, 6.0 mmol) in MeOH (4.0 mL) gave **1c** (425 mg, 72%) as yellow oil. Reaction time: 23 h. Eluent of SiO<sub>2</sub> column chromatography: Hexane/AcOEt = 4/1.

<sup>1</sup>H NMR (400 MHz, CDCl<sub>3</sub>) δ 8.19 (d, *J* = 15.6 Hz, 1H), 7.97 (d, *J* = 8.8 Hz, 2H), 7.67 (dd, *J* = 7.6, 1.2 Hz, 1H), 7.55 (d, *J* = 15.6 Hz, 1H), 7.48 (d, *J* = 7.6 Hz, 2H), 7.37 (td, *J* = 7.2, 1.2 Hz, 1H), 7.19 (d, *J* = 8.0 Hz, 1H), 7.06 (t, *J* = 7.6 Hz, 1H), 5.29 (s, 2H), 3.51 (s, 3H); <sup>13</sup>C NMR (100 MHz, CDCl<sub>3</sub>) δ 189.5, 156.6, 140.5, 139.0, 136.8, 132.0, 130.0, 128.9, 128.5, 124.4, 122.1, 122.0, 114.9, 94.6, 56.3; HRMS (ESI) calcd for C<sub>17</sub>H<sub>15</sub>O<sub>3</sub>Cl [M+H]<sup>+</sup> : 302.0710, found 302.0735.

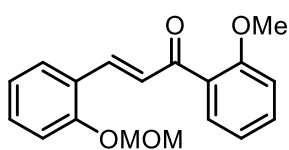

**(E)-3-(2-(Methoxymethoxy)phenyl)-1-(2-methoxyphenyl)prop-2-en-1-one (1d)**

According to the general procedure, the reaction of aldehyde (778 mg, 4.7 mmol) and 2'-methoxyacetophenone (773 mg, 5.2 mmol) with NaOH (561 mg, 14 mmol) in MeOH (16 mL) gave **1d** (1.18 g, 85%) as yellow oil. Reaction time: 2 h. Eluent of SiO<sub>2</sub> column chromatography: Hexane/AcOEt = 8/1.

<sup>1</sup>H NMR (400MHz, CDCl<sub>3</sub>) δ 8.02 (d, *J* = 16.0 Hz, 1H), 7.61-7.64 (m, 2H), 7.40-7.49 (m, 2H), 7.33 (ddd, *J* = 7.8, 7.8, 1.8 Hz, 1H), 6.99-7.06 (s, 3H), 7.15 (d, *J* = 8.4 Hz, 1H), 5.25 (2H, s), 3.90 (s, 3H), 3.48 (s, 3H); <sup>13</sup>C NMR (100 MHz, CDCl<sub>3</sub>) δ 193.2, 158.1, 156.3, 138.2, 132.8, 131.5, 130.3, 129.5, 128.3, 127.6, 124.8, 121.9, 120.7, 114.9, 111.6, 94.5, 56.12, 56.11, 55.6; HRMS (ESI) calcd for C<sub>18</sub>H<sub>18</sub>O<sub>4</sub> [M+Na]<sup>+</sup> 321.1097, found 321.1085.

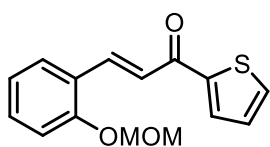

**(E)-3-(2-(Methoxymethoxy)phenyl)-1-(thiophen-2-yl)prop-2-en-1-one (1e)**

According to the general procedure, the reaction of aldehyde (1.50 g, 9.0 mmol) and 1-(thiophen-2-yl)ethan-1-one (1.14 g, 9.0 mmol) with NaOH (1.10 g, 27 mmol) in MeOH (18 mL) gave **1e** (2.20 g, 91%) as yellow oil. Reaction time: 1 h. Eluent of SiO<sub>2</sub> column chromatography: Hexane/AcOEt = 4/1.

<sup>1</sup>H NMR (400 MHz, CDCl<sub>3</sub>) δ 8.21 (d, *J* = 16.0 Hz, 1H), 7.86 (dd, *J* = 8.0, 0.8 Hz, 1H), 7.68-7.67 (m, 2H), 7.51 (d, *J* = 16.0 Hz, 1H), 7.37 (dd, *J* = 7.2, 1.6 Hz, 1H), 7.20-7.17 (m, 2H), 7.06 (t, *J* = 7.6 Hz, 1H), 5.30 (2H, s), 3.52 (s, 3H); <sup>13</sup>C NMR (100 MHz, CDCl<sub>3</sub>) δ 182.2, 156.3, 145.6, 138.9, 133.6, 131.7, 131.7, 128.4, 128.2, 124.2, 122.1, 121.8, 114.7, 94.3, 56.0; HRMS (ESI) calcd for C<sub>15</sub>H<sub>14</sub>O<sub>3</sub>SNa [M+Na]<sup>+</sup> : 297.0556, found 297.0545.

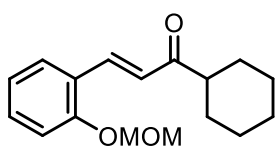

**(E)-1-Cyclohexyl-3-(2-(methoxymethoxy)phenyl)prop-2-en-1-one (1f)**

According to the general procedure, the reaction of aldehyde (405 mg, 2.4 mmol) and 1-cyclohexylethan-1-one (280 mg, 2.2 mmol) with NaOH (292 mg, 7.3 mmol) in MeOH (4.9 mL) gave **1f** (455 mg, 68%) as yellow oil. Reaction time: 15 h. Eluent of SiO<sub>2</sub> column chromatography: Hexane/AcOEt = 9/1.

<sup>1</sup>H NMR (400 MHz, CDCl<sub>3</sub>) δ 7.98 (d, *J* = 16.0 Hz, 1H), 7.58 (dd, *J* = 7.6, 1.6 Hz, 1H), 7.33 (td, *J* = 7.2, 1.6 Hz, 1H), 7.15 (d, *J* = 8.0 Hz, 1H), 7.02 (t, *J* = 7.6 Hz, 1H), 6.85 (d, *J* = 16.0 Hz, 1H), 5.26 (s, 2H), 3.50 (s, 3H), 2.70-2.63 (m, 1H), 1.92-1.69 (m, 5H), 1.49-1.23 (m, 5H); <sup>13</sup>C NMR (100 MHz, CDCl<sub>3</sub>) δ 203.6, 156.3, 137.3, 131.6, 128.1, 125.3, 124.6, 122.0, 114.9, 94.7, 56.2, 49.3, 28.7, 25.9, 25.7; HRMS (ESI) calcd for C<sub>17</sub>H<sub>22</sub>O<sub>3</sub> [M+Na]<sup>+</sup> 297.1461, found

297.1459.

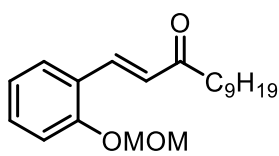

**(E)-1-(2-(Methoxymethoxy)phenyl)dodec-1-en-3-one (1g)**

According to the general procedure, the reaction of aldehyde (997 mg, 6.0 mmol) and 2-undecanone (1.23 g, 7.20 mmol) with NaOH (720 mg, 18 mmol) in MeOH (30 mL) gave **1g** (1.20 g, 63%) as colorless oil. Reaction time: 3.5 h at 70 °C. Eluent of SiO<sub>2</sub> column

chromatography: Hexane/AcOEt = 10/1.

<sup>1</sup>H NMR (600 MHz, CDCl<sub>3</sub>) δ 7.94 (d, *J* = 16.2 Hz, 1H), 7.57 (d, *J* = 7.2 Hz, 1H), 7.33 (t, *J* = 7.8 Hz, 1H), 7.16 (d, *J* = 8.4 Hz, 1H), 7.02 (t, *J* = 7.2 Hz, 1H), 6.77 (d, *J* = 16.2 Hz, 1H), 5.26 (s, 2H), 3.51 (s, 3H), 2.67 (t, *J* = 7.2 Hz, 2H), 1.70-1.66 (m, 2H), 1.36-1.27 (m, 12H), 0.88 (t, *J* = 7.2 Hz, 3H); <sup>13</sup>C NMR (151 MHz, CDCl<sub>3</sub>) δ <sup>13</sup>C NMR (151 MHz, CDCl<sub>3</sub>) δ 201.8, 147.7, 147.4, 137.2, 131.7, 125.4, 120.2, 117.3, 116.1, 110.3, 40.3, 32.0, 29.6, 29.5, 29.4, 26.2, 24.7, 22.8, 14.3; HRMS (ESI) calcd for C<sub>20</sub>H<sub>30</sub>O<sub>3</sub>Na [M+Na]<sup>+</sup>: 341.2087, found : 341.2077.

**Genral procedure for oxidative rearrangement of chalcones:** To the solution of **1** in MeOH (0.1 M) was added PhI(OH)OTs (2 equiv.) and then stirred at room temperature. The reaction was quenched with saturated aq. NaHCO<sub>3</sub> and the mixture was extracted with AcOEt. The combined organic layer was washed with brine, dried over Na<sub>2</sub>SO<sub>4</sub> and concentrated under the reduced pressure. The residue was purified by SiO<sub>2</sub> column chromatography (eluent: Hexane/AcOEt) to give the desired **2**.

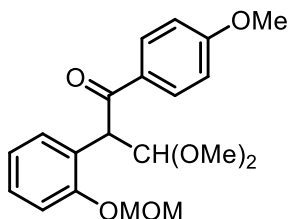

**3,3-Dimethoxy-2-(2-(methoxymethoxy)phenyl)-1-(4-methoxyphenyl)propan-1-one (2a)**

According to the general procedure, the reaction of chalcone **1a** (1.48 g, 5.0 mmol) with PhI(OH)OTs (3.90 g, 10.0 mmol) in MeOH (50 mL) gave **2a** (1.15 g, 64%) as yellow oil. Reaction time: 1 h. Eluent of SiO<sub>2</sub> column chromatography: Hexane/AcOEt = 4/1.

<sup>1</sup>H NMR (100 MHz, CDCl<sub>3</sub>) δ 8.07 (d, *J* = 8.8 Hz, 2H), 7.43 (d, *J* = 8.4 Hz, 1H), 7.17 (t, *J* = 7.6 Hz, 1H), 7.11 (d, *J* = 8.4 Hz, 1H), 6.95 (t, *J* = 7.6 Hz, 1H), 6.86 (d, *J* = 8.8 Hz, 1H), 5.48 (d, *J* = 8.8 Hz, 1H), 5.29 (s, 2H), 5.18 (d, *J* = 8.8 Hz, 1H), 3.82 (s, 3H), 3.51 (s, 3H), 3.45 (s, 3H), 3.21 (s, 3H); <sup>13</sup>C NMR (100 MHz, CDCl<sub>3</sub>) δ 197.0, 163.8, 154.7, 131.2, 130.1, 129.1, 128.7, 124.6, 122.2, 114.7, 113.7, 107.0, 95.0, 56.24, 56.18, 55.5, 54.0, 47.8; HRMS (ESI) calcd for C<sub>20</sub>H<sub>24</sub>O<sub>6</sub> [M+Na]<sup>+</sup> 383.1465, found 383.1450.

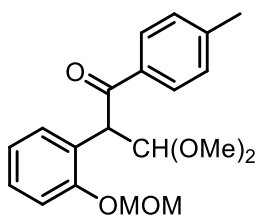

**3,3-Dimethoxy-2-(2-(methoxymethoxy)phenyl)-1-(p-tolyl)propan-1-one (2b)**

According to the general procedure, the reaction of chalcone **1b** (80.2 mg, 0.28 mmol) with PhI(OH)OTs (220 mg, 0.56 mmol) in MeOH (2.8 mL) gave **2b** (67.7 mg, 70%) as yellow oil. Reaction time: 2 h. Eluent of SiO<sub>2</sub> column chromatography: Hexane/AcOEt = 10/1.

<sup>1</sup>H NMR (400 MHz, CDCl<sub>3</sub>) δ 7.99 (d, *J* = 8.0 Hz, 2H), 7.42 (d, *J* = 8.0 Hz, 1H), 7.19-7.10 (m, 4H), 6.95 (t, *J* = 7.4 Hz, 1H), 5.51 (d, *J* = 8.4 Hz, 1H), 5.29 (s, 2H), 5.19 (d, *J* = 8.4 Hz, 1H), 3.51 (s, 3H), 3.45 (s, 3H), 3.21 (s, 3H), 2.35 (s, 3H); <sup>13</sup>C NMR (100 MHz, CDCl<sub>3</sub>) δ 198.1, 154.8, 144.0, 134.6, 129.3, 129.1, 129.0, 128.7, 124.4, 122.2, 114.7, 107.0, 94.9, 56.24, 56.20, 54.0, 48.1, 21.6; HRMS (ESI) calcd for C<sub>20</sub>H<sub>24</sub>O<sub>5</sub> [M+H]<sup>+</sup> 367.1516, found 367.1514.

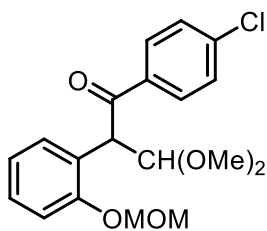

### 1-(4-Chlorophenyl)-3,3-dimethoxy-2-(2-(methoxymethoxy)phenyl)propan-1-one (2c)

According to the general procedure, the reaction of chalcone **1c** (50.0 mg, 0.17 mmol) with  $\text{PhI}(\text{OH})\text{OTs}$  (130 mg, 0.33 mmol) in MeOH (1.7 mL) gave **2c** (35.5 mg, 65%) as yellow oil. Reaction time: 2 h. Eluent of  $\text{SiO}_2$  column chromatography: Hexane/AcOEt = 10/1.

$^1\text{H}$  NMR (400 MHz,  $\text{CDCl}_3$ )  $\delta$  8.02 (d,  $J = 7.6$  Hz, 2H), 7.39-7.35 (m, 3H), 7.19 (td,  $J = 7.2$ , 1.6 Hz, 1H), 7.12 (d,  $J = 7.2$  Hz, 1H), 6.96 (t,  $J = 7.2$  Hz, 1H), 5.45 (d,  $J = 8.8$  Hz, 1H),

5.28 (s, 2H), 5.16 (d,  $J = 8.8$  Hz, 1H), 3.50 (s, 3H), 3.45 (s, 3H), 3.21 (s, 3H);  $^{13}\text{C}$  NMR (100 MHz,  $\text{CDCl}_3$ )  $\delta$  197.3, 154.7, 139.7, 135.4, 130.3, 129.1, 129.0, 128.9, 123.9, 122.3, 114.8, 106.8, 94.9, 56.3, 54.0, 48.4; HRMS (ESI) calcd for  $\text{C}_{19}\text{H}_{21}\text{O}_5\text{Cl}$   $[\text{M}+\text{Na}]^+$  387.0970, found 387.0967.

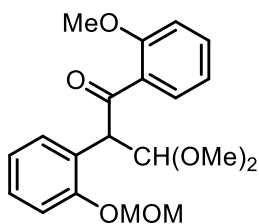

### 3,3-Dimethoxy-2-(2-(methoxymethoxy)phenyl)-1-(2-methoxyphenyl)propan-1-one (2d)

According to the general procedure, the reaction of chalcone **1d** (1.04 g, 3.5 mmol) with  $\text{PhI}(\text{OH})\text{OTs}$  (2.74 g, 7.0 mmol) in MeOH (35 mL) gave **2d** (970 mg, 78%) as yellow oil. Reaction time: 1 h. Eluent of  $\text{SiO}_2$  column chromatography: Hexane/AcOEt = 4/1.

$^1\text{H}$  NMR (400 MHz,  $\text{CDCl}_3$ )  $\delta$ : 7.53 (dd,  $J = 7.6$ , 1.6 Hz, 1H), 7.39 (dd,  $J = 8.0$ , 1.6 Hz, 1H), 7.33 (td,  $J = 7.6$ , 1.2 Hz, 1H), 7.14 (td,  $J = 7.2$ , 1.6 Hz, 1H), 7.03 (d,  $J = 7.6$  Hz, 1H), 6.96-6.83 (m, 3H), 5.49 (d,  $J = 8.4$  Hz, 1H), 5.14 (d,  $J = 8.0$  Hz, 1H), 5.09 (s, 2H), 3.80 (s, 3H), 3.49 (s, 3H), 3.39 (s, 3H), 3.19 (s, 3H);  $^{13}\text{C}$  NMR (100 MHz,  $\text{CDCl}_3$ )  $\delta$  200.5, 158.2, 155.6, 133.0, 130.5, 129.8, 129.1, 128.5, 124.7, 121.9, 120.4, 114.6, 111.6, 106.6, 94.9, 55.92, 55.88, 55.5, 54.3, 53.2; HRMS (ESI) calcd for  $\text{C}_{20}\text{H}_{24}\text{O}_6\text{Na}$   $[\text{M}+\text{Na}]^+$  383.1465, found 383.1450.

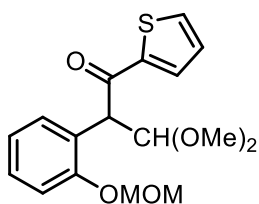

### 3,3-Dimethoxy-2-(2-(methoxymethoxy)phenyl)-1-(thiophen-2-yl)propan-1-one (2e)

According to the general procedure, the reaction of chalcone **1e** (81.4 mg, 0.30 mmol) with  $\text{PhI}(\text{OH})\text{OTs}$  (233 mg, 0.60 mmol) in MeOH (3.0 mL) gave **2e** (25.2 mg, 23%) as yellow oil. Reaction time: 2.5 h. Eluent of  $\text{SiO}_2$  column chromatography: Hexane/AcOEt = 4/1.

$^1\text{H}$  NMR (400 MHz,  $\text{CDCl}_3$ )  $\delta$  7.93 (d,  $J = 4.0$  Hz, 1H), 7.59 (dd,  $J = 4.8$ , 1.2 Hz, 1H), 7.47 (dd,  $J = 7.6$ , 1.6 Hz, 1H), 7.20 (td,  $J = 8.8$ , 1.6 Hz, 1H), 7.12 (d,  $J = 7.2$  Hz, 1H), 7.06 (1H, dd,  $J = 4.8$ , 4.0 Hz), 6.98 (t,  $J = 7.2$  Hz, 1H), 5.37 (d,  $J = 8.8$  Hz, 1H), 5.29 (s, 2H), 5.17 (d,  $J = 8.8$  Hz, 1H), 3.50 (s, 3H), 3.47 (s, 3H), 3.21 (s, 3H);  $^{13}\text{C}$  NMR (100 MHz,  $\text{CDCl}_3$ )  $\delta$  191.1, 154.8, 144.8, 134.4, 132.9, 129.1, 128.9, 128.1, 124.3, 122.3, 114.7, 106.4, 94.9, 56.32, 56.28, 53.8, 49.6; HRMS (ESI) calcd for  $\text{C}_{17}\text{H}_{20}\text{O}_5\text{SNa}$   $[\text{M}+\text{Na}]^+$  359.0924, found 359.0910.

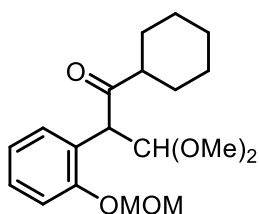

### 1-Cyclohexyl-3,3-dimethoxy-2-(2-(methoxymethoxy)phenyl)propan-1-one (2f)

According to the general procedure, the reaction of chalcone **1f** (116 mg, 0.42 mmol) with  $\text{PhI}(\text{OH})\text{OTs}$  (332 mg, 0.85 mmol) in MeOH (4.0 mL) gave **2f** (89.2 mg, 63%) as yellow oil. Reaction time: 2 h. Eluent of  $\text{SiO}_2$  column chromatography: Hexane/AcOEt = 4/1.

$^1\text{H}$  NMR (400 MHz,  $\text{CDCl}_3$ )  $\delta$  7.33 (d,  $J = 7.6$  Hz, 1H), 7.20 (t,  $J = 8.4$  Hz, 1H), 7.11 (d,  $J = 8.4$  Hz, 1H), 6.96 (t,  $J = 7.6$  Hz, 1H), 5.24 (s, 2H), 4.99 (d,  $J = 8.8$  Hz, 1H), 4.80 (d,  $J = 8.8$  Hz, 1H), 3.51 (s, 3H), 3.42 (s, 3H), 3.13 (s, 3H), 2.39-2.33 (m, 1H), 1.91-1.61 (m, 4H), 1.32-1.13 (m, 6H);  $^{13}\text{C}$  NMR (100 MHz,  $\text{CDCl}_3$ )  $\delta$  211.3, 155.1, 129.4, 128.6, 123.8, 122.1, 114.4, 106.2, 94.8, 56.3, 56.2, 53.2, 51.2, 51.1, 28.4, 27.8, 25.9, 25.8, 25.5; HRMS (ESI) calcd for  $\text{C}_{19}\text{H}_{28}\text{O}_5\text{Na}$   $[\text{M}+\text{Na}]^+$  359.1829, found 359.1826.

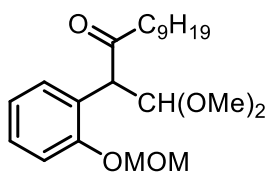

### 1,1-Dimethoxy-2-(2-(methoxymethoxy)phenyl)dodecan-3-one (**2g**)

According to the general procedure, the reaction of chalcone **1g** (50.2 mg, 0.16 mmol) with PhI(OH)OTs (124 mg, 0.32 mmol) in MeOH (1.6 mL) gave **2g** (35.1 mg, 58%) as yellow oil. Reaction time: 1.5 h. Eluent of SiO<sub>2</sub> column chromatography: Hexane/AcOEt = 8/1.

<sup>1</sup>H NMR (400 MHz, CDCl<sub>3</sub>) δ 7.30 (dd, *J* = 7.6, 1.6 Hz, 1H), 7.21 (td, *J* = 7.2, 2.0 Hz, 1H), 7.11 (d, *J* = 7.2 Hz, 1H), 6.98 (t, *J* = 7.6 Hz, 1H), 5.23 (s, 2H), 5.04 (d, *J* = 8.8 Hz, 1H), 4.62 (d, *J* = 8.8 Hz, 1H), 3.50 (s, 3H), 3.45 (s, 3H), 3.15 (s, 3H), 2.45-2.39 (m, 2H), 1.52-1.44 (m, 2H), 1.28-1.18 (m, 12H), 0.86 (t, *J* = 7.2 Hz, 3H); <sup>13</sup>C NMR (151 MHz, CDCl<sub>3</sub>) δ 208.5, 155.0, 129.4, 128.6, 123.9, 122.2, 114.4, 105.4, 94.8, 56.3, 53.3, 53.0, 43.5, 32.0, 29.6, 29.5, 29.4, 29.1, 23.4, 22.8, 14.2; HRMS (ESI) calcd for C<sub>22</sub>H<sub>36</sub>O<sub>5</sub>Na [M+Na]<sup>+</sup>: 403.2455, found: 403.2438.

**General procedure for the synthesis of dihydrobenzofuran:** To the solution of **2** in MeCN (0.1 M) was added *p*-TsOH·H<sub>2</sub>O (0.1-0.2 equiv.) and then stirred at room temperature. The reaction was quenched with saturated aq. NaHCO<sub>3</sub> and the mixture was extracted with AcOEt. The combined organic layer was washed with brine, dried over Na<sub>2</sub>SO<sub>4</sub> and concentrated under the reduced pressure. The residue was purified by SiO<sub>2</sub> column chromatography (eluent: Hexane/AcOEt) to give the desired **3**.

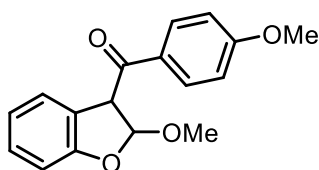

### (2-Methoxy-2,3-dihydrobenzofuran-3-yl)(4-methoxyphenyl)methanone (**3a**)

According to the general procedure, the reaction of acetal **2a** (43.6 mg, 0.13 mmol) with *p*-TsOH·H<sub>2</sub>O (2.2 mg, 0.013 mmol) in MeCN (1.3 mL) gave **3a** (30.7 mg, 83%) as white solid. Reaction time: 1 h. Eluent of SiO<sub>2</sub> column chromatography:

Hexane/AcOEt = 4/1.

<sup>1</sup>H NMR (400 MHz, CDCl<sub>3</sub>) δ 8.07 (d, *J* = 8.8 Hz, 2H), 7.19 (t, *J* = 7.4 Hz, 1H), 7.04-7.01 (m, 3H), 6.90 (d, *J* = 8.0 Hz, 1H), 6.81 (t, *J* = 7.4 Hz, 1H), 6.02 (d, *J* = 2.0 Hz, 1H), 5.01 (d, *J* = 2.0 Hz, 1H), 3.92 (s, 3H), 3.61 (s, 3H); <sup>13</sup>C NMR (100 MHz, CDCl<sub>3</sub>) δ 194.0, 164.4, 158.5, 131.7, 129.6, 128.9, 125.2, 124.3, 121.1, 114.3, 110.6, 109.4, 56.6, 56.5, 55.7; HRMS (FAB) calcd for C<sub>17</sub>H<sub>16</sub>O<sub>4</sub> [M]<sup>+</sup> calcd for 284.1049, found 284.1042.

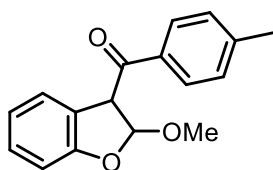

### (2-Methoxy-2,3-dihydrobenzofuran-3-yl)(*p*-tolyl)methanone (**3b**)

According to the general procedure, the reaction of acetal **2b** (67.7 mg, 0.20 mmol) with *p*-TsOH·H<sub>2</sub>O (3.4 mg, 0.020 mmol) in MeCN (2.0 mL) gave **3b** (31.2 mg, 58%) as white solid. Reaction time: 1 h. Eluent of SiO<sub>2</sub> column chromatography: Hexane/AcOEt = 10/1.

<sup>1</sup>H NMR (400 MHz, CDCl<sub>3</sub>) δ 7.98 (d, *J* = 8.0 Hz, 2H), 7.35 (d, *J* = 8.4 Hz, 2H), 7.19 (t, *J* = 8.0 Hz, 1H), 7.00 (d, *J* = 7.6 Hz, 1H), 6.90 (d, *J* = 8.0 Hz, 1H), 6.81 (t, *J* = 7.6 Hz, 1H), 6.03 (d, *J* = 2.4 Hz, 1H), 5.03 (d, *J* = 1.2 Hz, 1H), 3.61 (s, 3H), 2.46 (s, 3H); <sup>13</sup>C NMR (100 MHz, CDCl<sub>3</sub>) δ 195.1, 158.5, 145.1, 133.4, 129.9, 129.6, 129.5, 125.3, 124.1, 121.1, 110.6, 109.3, 56.8, 56.5, 21.8; HRMS (FAB) calcd for C<sub>17</sub>H<sub>16</sub>O<sub>3</sub> [M]<sup>+</sup> 268.1099, found 268.1094.

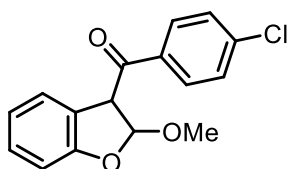

### (4-Chlorophenyl)(2-methoxy-2,3-dihydrobenzofuran-3-yl)methanone (**3c**)

According to the general procedure, the reaction of acetal **2c** (45.4 mg, 0.12 mmol) with *p*-TsOH·H<sub>2</sub>O (2.0 mg, 0.012 mmol) in MeCN (1.2 mL) gave **3c** (24.3 mg, 70%) as white solid. Reaction time: 1 h. Eluent of SiO<sub>2</sub> column chromatography: Hexane/AcOEt = 10/1.

$^1\text{H}$  NMR (400 MHz,  $\text{CDCl}_3$ )  $\delta$  8.02 (d,  $J = 8.4$  Hz, 2H), 7.54 (d,  $J = 8.4$  Hz, 1H), 7.21 (t,  $J = 8.0$  Hz, 1H), 6.98 (d,  $J = 7.2$  Hz, 1H), 6.91 (d,  $J = 8.4$  Hz, 1H), 6.83 (t,  $J = 7.2$  Hz), 6.00 (d,  $J = 2.0$  Hz, 1H), 4.99 (d,  $J = 1.2$  Hz, 1H), 3.61 (s, 3H);  $^{13}\text{C}$  NMR (100 MHz,  $\text{CDCl}_3$ )  $\delta$  194.3, 158.5, 140.7, 134.3, 130.7, 129.8, 129.5, 125.3, 123.5, 121.3, 110.8, 109.0, 57.0, 56.5; HRMS (FAB) calcd for  $\text{C}_{16}\text{H}_{13}\text{O}_3\text{Cl}$   $[\text{M}]^+$  288.0553, found 288.0567.

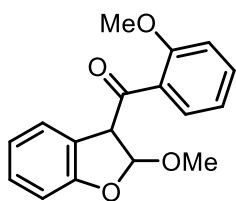

**(2-Methoxy-2,3-dihydrobenzofuran-3-yl)(2-methoxyphenyl)methanone (3d)**

According to the general procedure, the reaction of acetal **2d** (516 mg, 1.4 mmol) with *p*-TsOH $\cdot$ H $_2$ O (54.4 mg, 0.28 mmol) in MeCN (14 mL) gave **3d** (307 mg, 75%) as white solid.

Reaction time: 1 h. Eluent of SiO $_2$  column chromatography: Hexane/AcOEt = 9/1.

$^1\text{H}$  NMR (400 MHz,  $\text{CDCl}_3$ )  $\delta$  7.59 (dd,  $J = 7.6, 2.0$  Hz, 1H), 7.53 (td,  $J = 7.6, 2.0$  Hz, 1H), 7.16 (t,  $J = 8.0$  Hz, 1H), 7.06-7.00 (m, 2H), 6.92-6.87 (m, 2H), 6.77 (t,  $J = 7.6$  Hz, 1H), 6.03 (d,  $J = 2.0$  Hz, 1H), 5.24 (s, 1H), 3.97 (s, 3H), 3.59 (s, 3H);  $^{13}\text{C}$  NMR (100 MHz,  $\text{CDCl}_3$ )  $\delta$  197.8, 158.6, 158.4, 134.4, 131.4, 129.3, 126.8, 125.2, 124.6, 121.2, 121.1, 111.7, 110.5, 108.9, 61.0, 56.2, 55.6; HRMS (ESI) calcd for  $\text{C}_{17}\text{H}_{16}\text{O}_4\text{Na}$   $[\text{M}+\text{Na}]^+$  307.0941, found 307.0939.

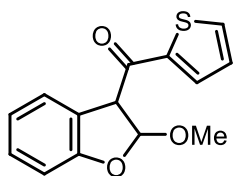

**(2-Methoxy-2,3-dihydrobenzofuran-3-yl)(thiophen-2-yl)methanone (3e)**

According to the general procedure, the reaction of acetal **2e** (23.2 mg, 0.069 mmol) with *p*-TsOH $\cdot$ H $_2$ O (1.3 mg, 0.007 mmol) in MeCN (0.7 mL) gave **3e** (9.2 mg, 51%) as white solid.

Reaction time: 1 h. Eluent of SiO $_2$  column chromatography: Hexane/AcOEt = 4/1.

$^1\text{H}$  NMR (400 MHz,  $\text{CDCl}_3$ )  $\delta$  7.91 (d,  $J = 3.2$  Hz, 1H), 7.77 (d,  $J = 4.8$  Hz, 1H), 7.25-7.20 (m, 2H), 7.11 (d,  $J = 7.2$  Hz, 1H), 6.92 (d,  $J = 8.0$  Hz, 1H), 6.86 (t,  $J = 7.6$  Hz, 1H), 6.00 (d,  $J = 2.0$  Hz, 1H), 4.86 (s, 1H), 3.61 (s, 3H);  $^{13}\text{C}$  NMR (100 MHz,  $\text{CDCl}_3$ )  $\delta$  188.5, 158.6, 143.4, 135.5, 133.6, 129.9, 128.7, 125.2, 121.3, 110.7, 109.2, 58.3, 56.5; HRMS (FAB) calcd for  $\text{C}_{14}\text{H}_{12}\text{O}_3\text{S}$   $[\text{M}]^+$  260.0507, found 260.0481.

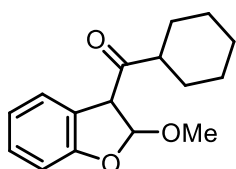

**Cyclohexyl(2-methoxy-2,3-dihydrobenzofuran-3-yl)methanone (3f)**

According to the general procedure, the reaction of acetal **2f** (89.2 mg, 0.27 mmol) with *p*-TsOH $\cdot$ H $_2$ O (5.0 mg, 0.027 mmol) in MeCN (3.0 mL) gave **3f** (43.1 mg, 63%) as white solid.

Reaction time: 1 h. Eluent of SiO $_2$  column chromatography: Hexane/AcOEt = 10/1.

$^1\text{H}$  NMR (400 MHz,  $\text{CDCl}_3$ )  $\delta$  7.27-7.20 (m, 2H), 6.94-6.88 (m, 2H), 5.82 (d,  $J = 2.0$  Hz, 1H), 4.27 (s, 1H), 3.54 (s, 3H), 2.74-2.66 (m, 1H), 1.98-1.95 (m, 1H), 1.84-1.68 (m, 4H), 1.46-1.23 (m, 5H);  $^{13}\text{C}$  NMR (100 MHz,  $\text{CDCl}_3$ )  $\delta$  208.5, 158.5, 129.7, 124.7, 123.7, 121.4, 110.8, 108.5, 59.9, 56.3, 49.1, 29.0, 27.9, 25.9, 25.8, 25.3; HRMS (ESI) calcd for  $\text{C}_{16}\text{H}_{20}\text{O}_3$   $[\text{M}+\text{Na}]^+$  283.1305, found 283.1302.

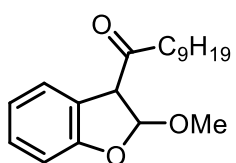

**1-(2-Methoxy-2,3-dihydrobenzofuran-3-yl)decan-1-one (3g)**

According to the general procedure, the reaction of acetal **2g** (41.3 mg, 0.11 mmol) with *p*-TsOH $\cdot$ H $_2$ O (4.1 mg, 0.022 mmol) in MeCN (1.0 mL) gave **3g** (19.7 mg, 59%) as colorless oil.

Reaction time: 1 h. Eluent of SiO $_2$  column chromatography: Hexane/AcOEt = 6/1.

$^1\text{H}$  NMR (600 MHz,  $\text{CDCl}_3$ )  $\delta$  7.29 (d,  $J = 7.8$  Hz, 1H), 7.23 (t,  $J = 7.8$  Hz, 1H), 6.94 (t,  $J = 7.8$  Hz, 1H), 6.89 (d,  $J = 7.8$  Hz, 1H), 5.84 (d,  $J = 1.8$  Hz, 1H), 4.11 (d,  $J = 1.8$  Hz, 1H), 3.55 (s, 3H), 2.64-2.53 (m, 2H), 1.60-1.56 (m, 2H), 1.30-1.25 (12H, m), 0.88 (t,  $J = 7.2$  Hz, 3H);  $^{13}\text{C}$  NMR (151 MHz,  $\text{CDCl}_3$ )  $\delta$  205.5, 158.3, 129.7, 124.9, 123.5, 121.4,

110.8, 108.3, 61.8, 56.3 41.0, 32.0, 29.52, 29.49, 29.37, 29.2, 23.5, 22.8, 14.2; HRMS (ESI) calcd for C<sub>19</sub>H<sub>28</sub>O<sub>3</sub>Na [M+Na]<sup>+</sup> : 327.1931, found : 327.1927.

**General procedure for the synthesis of 3-acylbenzofuran:** To the solution of **3** in THF (0.1 M) was added K<sub>2</sub>CO<sub>3</sub> (2 equiv.) and then stirred at room temperature. The reaction was quenched with saturated aq. NH<sub>4</sub>Cl and the mixture was extracted with AcOEt. The combined organic layer was washed with brine, dried over Na<sub>2</sub>SO<sub>4</sub> and concentrated under the reduced pressure. The residue was purified by SiO<sub>2</sub> column chromatography (eluent: Hexane/AcOEt) to give the desired **4**.

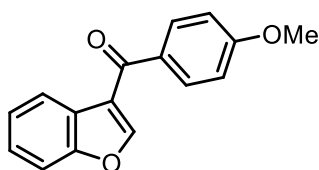

**Benzofuran-3-yl(4-methoxyphenyl)methanone (4a)**

According to the general procedure, the reaction of **3a** (30.0 mg, 0.11 mmol) with K<sub>2</sub>CO<sub>3</sub> (30.4 mg, 0.22 mmol) in THF (1.1 mL) gave **4a** (25.7 mg, 97%) as white solid. Reaction time: 4 h. Eluent of SiO<sub>2</sub> column chromatography: Hexane/AcOEt = 10/1.

<sup>1</sup>H NMR (400 MHz, CDCl<sub>3</sub>) δ 8.19-8.17 (m, 1H), 8.08 (s, 1H), 7.93 (d, *J* = 9.2 Hz, 2H), 7.58-7.56 (m, 1H), 7.43-7.37 (m, 2H), 7.01 (d, *J* = 8.4 Hz, 2H), 3.91 (s, 3H); <sup>13</sup>C NMR (100 MHz, CDCl<sub>3</sub>) δ 189.0, 163.6, 155.8, 151.3, 132.1, 131.4, 125.9, 125.7, 124.6, 123.0, 121.5, 114.1, 111.7, 55.6; HRMS (FAB) calcd for C<sub>16</sub>H<sub>12</sub>O<sub>3</sub> [M]<sup>+</sup> 252.0786, found 252.0815.

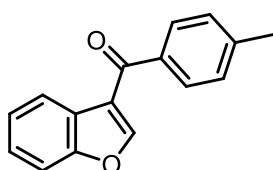

**Benzofuran-3-yl(p-tolyl)methanone (4b)**

According to the general procedure, the reaction of **3b** (24.1 mg, 0.09 mmol) with K<sub>2</sub>CO<sub>3</sub> (24.9 mg, 0.18 mmol) in THF (0.9 mL) gave **4b** (20.0 mg, 94%) as white solid. Reaction time: 6 h.

<sup>1</sup>H NMR (400 MHz, CDCl<sub>3</sub>) δ 8.24-8.22 (m, 1H), 8.09 (s, 1H), 7.82 (d, *J* = 8.0 Hz, 2H), 7.58-7.56 (m, 1H), 7.43-7.38 (m, 2H), 7.33 (d, *J* = 8.0 Hz, 2H), 2.46 (s, 3H); <sup>13</sup>C NMR (100 MHz, CDCl<sub>3</sub>) δ 190.2, 155.8, 152.0, 143.5, 136.8, 129.5, 129.2, 125.9, 125.6, 124.6, 123.1, 121.5, 111.6, 21.7; HRMS (FAB) calcd for C<sub>16</sub>H<sub>12</sub>O<sub>2</sub> [M]<sup>+</sup> : 236.0837, found : 236.0834.

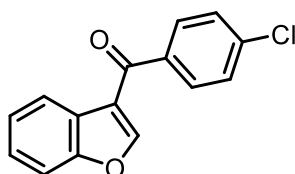

**Benzofuran-3-yl(4-chlorophenyl)methanone (4c)**

According to the general procedure, the reaction of **3c** (10.1 mg, 0.035 mmol) with K<sub>2</sub>CO<sub>3</sub> (9.7 mg, 0.070 mmol) in THF (0.35 mL) gave **4c** (8.8 mg, 98%) as other solid. Reaction time: 2.5 h.

<sup>1</sup>H NMR (400 MHz, CDCl<sub>3</sub>) δ 8.22-8.20 (m, 1H), 8.08 (s, 1H), 7.85 (d, *J* = 8.4 Hz, 2H), 7.59-7.57 (m, 1H), 7.51 (d, *J* = 8.4 Hz, 2H), 7.45-7.40 (m, 2H); <sup>13</sup>C NMR (100 MHz, CDCl<sub>3</sub>) δ 189.1, 155.9, 152.2, 139.2, 137.7, 130.4, 129.2, 126.2, 125.2, 124.9, 123.0, 121.3, 111.8; HRMS (FAB) calcd for C<sub>15</sub>H<sub>9</sub>O<sub>2</sub>Cl [M]<sup>+</sup> 256.0291, found 256.0276.

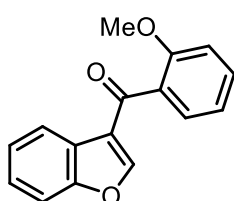

**Benzofuran-3-yl(2-methoxyphenyl)methanone (4d)**

According to the general procedure, the reaction of **3d** (62.5 mg, 0.22 mmol) with K<sub>2</sub>CO<sub>3</sub> (60.8 mg, 0.44 mmol) in THF (2.2 mL) gave **4d** (55.2 mg, 99%) as white solid. Reaction time: 23 h. Eluent of SiO<sub>2</sub> column chromatography: Hexane/AcOEt = 4/1.

<sup>1</sup>H NMR (400 MHz, CDCl<sub>3</sub>) δ 8.26-8.23 (m, 1H), 7.92 (s, 1H), 7.55-7.43 (m, 3H), 7.41-7.37



(m, 2H), 7.07-7.02 (m, 2H), 3.80 (s, 3H);  $^{13}\text{C}$  NMR (100 MHz,  $\text{CDCl}_3$ )  $\delta$  190.4, 157.2, 156.0, 153.9, 132.2, 130.0, 129.3, 125.8, 124.9, 124.7, 123.1, 120.6, 120.6, 111.9, 111.6, 55.8; HRMS (ESI) calcd for  $\text{C}_{16}\text{H}_{12}\text{O}_3\text{Na}$   $[\text{M}+\text{Na}]^+$  275.0679, found 275.0667.

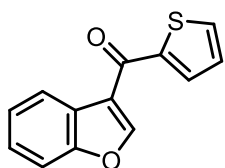

#### Benzofuran-3-yl(thiophen-2-yl)methanone (**4e**)

According to the general procedure, the reaction of **3e** (9.1 mg, 0.035 mmol) with  $\text{K}_2\text{CO}_3$  (9.7 mg, 0.070 mmol) in THF (0.4 mL) gave **4e** (7.7 mg, 96%) as white solid. Reaction time: 1 h. Eluent of  $\text{SiO}_2$  column chromatography: Hexane/AcOEt = 10/1.

$^1\text{H}$  NMR (400 MHz,  $\text{CDCl}_3$ )  $\delta$  8.32 (s, 1H), 8.22-8.20 (m, 1H), 7.84 (dd,  $J = 3.6, 0.8$  Hz, 1H), 7.72 (dd,  $J = 4.4, 1.2$  Hz, 1H), 7.59-7.57 (m, 1H), 7.44-7.38 (m, 2H), 7.21 (dd,  $J = 4.8, 4.0$  Hz, 1H);  $^{13}\text{C}$  NMR (100 MHz,  $\text{CDCl}_3$ )  $\delta$  181.1, 155.7, 150.4, 144.5, 133.5, 132.5, 128.2, 126.1, 125.3, 124.6, 122.9, 121.5, 111.7; HRMS (FAB): calcd for  $\text{C}_{13}\text{H}_8\text{O}_2\text{S}$   $[\text{M}]^+$  : 228.0245, found : 228.0244.

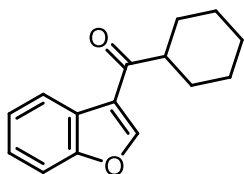

#### Benzofuran-3-yl(cyclohexyl)methanone (**4f**)

According to the general procedure, the reaction of **3f** (50.0 mg, 0.19 mmol) with  $\text{K}_2\text{CO}_3$  (52.5 mg, 0.38 mmol) in THF (1.9 mL) gave **4f** (38.9 mg, 90%) as white solid. Reaction time: 1 h. Eluent of  $\text{SiO}_2$  column chromatography: Hexane/AcOEt = 10/1.

$^1\text{H}$  NMR (400 MHz,  $\text{CDCl}_3$ )  $\delta$ : 8.73-8.24 (m, 2H), 7.54-7.51 (m, 1H), 7.38-7.36 (m, 2H), 3.00-2.94 (m, 1H), 1.95-1.86 (m, 4H), 1.76-1.55 (m, 4H), 1.43-1.26 (m, 3H);  $^{13}\text{C}$  NMR (100 MHz,  $\text{CDCl}_3$ )  $\delta$  199.9, 156.0, 150.7, 125.7, 124.9, 124.7, 123.2, 121.4, 111.6, 48.9, 29.6, 25.90, 25.88; HRMS (FAB) calcd for  $\text{C}_{15}\text{H}_{16}\text{O}_2$   $[\text{M}]^+$  : 228.1150, found 228.1166.

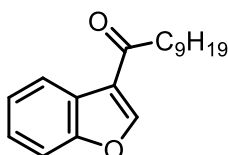

#### 1-(Benzofuran-3-yl)decan-1-one (**4g**)

According to the general procedure, the reaction of **3g** (13.6 mg, 0.045 mmol) with  $\text{K}_2\text{CO}_3$  (12.3 mg, 0.089 mmol) in THF (0.5 mL) gave **4g** (11.3 mg, 92%) as white solid. Reaction time: 2.5 h. Eluent of  $\text{SiO}_2$  column chromatography: Hexane/AcOEt = 10/1.

$^1\text{H}$  NMR (600 MHz,  $\text{CDCl}_3$ )  $\delta$  8.26-8.24 (m, 2H), 7.53-7.52 (m, 1H), 7.38-7.36 (m, 2H), 7.55-7.59 (m, 1H), 2.86 (t,  $J = 7.2$  Hz, 3H), 1.79-1.76 (m, 2H), 1.39-1.24 (12H, m), 0.88 (t,  $J = 7.2$  Hz, 3H);  $^{13}\text{C}$  NMR (151 MHz,  $\text{CDCl}_3$ )  $\delta$  196.3, 155.8, 150.8, 125.7, 124.6, 124.5, 123.1, 122.5, 111.6, 40.8, 32.0, 29.63, 29.60, 29.5, 29.4, 24.7, 22.8, 14.2; HRMS (ESI) calcd for  $\text{C}_{18}\text{H}_{25}\text{O}_2$   $[\text{M}+\text{H}]^+$  : 273.1849, found : 273.1836.

**General procedure for the synthesis of 3-formylbenzofuran:** To the solution of **3** in  $(\text{CF}_3)_2\text{CHOH}$  (0.1 M) was added *p*-TsOH $\cdot$ H $_2\text{O}$  (2 equiv.) and then stirred at room temperature. The reaction was quenched with saturated aq.  $\text{NaHCO}_3$  and the mixture was extracted with AcOEt. The combined organic layer was washed with brine, dried over  $\text{Na}_2\text{SO}_4$  and concentrated under the reduced pressure. The residue was purified by  $\text{SiO}_2$  column chromatography (eluent: Hexane/AcOEt) to give the desired **5**.

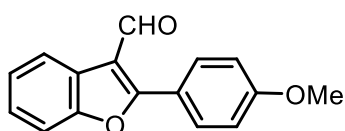

### 2-(4-Methoxyphenyl)benzofuran-3-carbaldehyde (**5a**)<sup>1)</sup>

According to the general procedure, the reaction of **3a** (19.9 mg, 0.07 mmol) and *p*-TsOH•H<sub>2</sub>O (26.6 mg, 0.14 mmol) in (CF<sub>3</sub>)<sub>2</sub>CHOH (0.7 mL) gave **5a** (17.3 mg, 98%) as white solid. Reaction time: 20 min. Eluent of SiO<sub>2</sub> column chromatography:

Hexane/AcOEt = 2/1.

<sup>1</sup>H NMR (400 MHz, CDCl<sub>3</sub>) δ 10.33 (s, 1H), 8.27-8.25 (m, 1H), 7.83 (d, *J* = 8.8 Hz, 2H), 7.55-7.53 (m, 1H), 7.39-7.37 (m, 1H), 7.08 (d, *J* = 8.8 Hz, 2H), 3.91 (s, 3H); <sup>13</sup>C NMR (100 MHz, CDCl<sub>3</sub>) δ 186.8, 165.8, 162.2, 153.9, 130.9, 125.8, 125.8, 124.9, 122.6, 121.2, 116.7, 114.8, 111.1, 55.7.

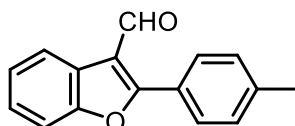

### 2-(*p*-Tolyl)benzofuran-3-carbaldehyde (**5b**)

According to the general procedure, the reaction of **3b** (20.0 mg, 0.075 mmol) and *p*-TsOH•H<sub>2</sub>O (28.5 mg, 0.15 mmol) in (CF<sub>3</sub>)<sub>2</sub>CHOH (0.8 mL) gave **5b** (17.3 mg, 98%) as yellow solid. Reaction time: 20 min. Eluent of SiO<sub>2</sub> column chromatography:

Hexane/AcOEt = 2/1.

<sup>1</sup>H NMR (400 MHz, CDCl<sub>3</sub>) δ 10.34 (s, 1H), 8.29-8.26 (m, 1H), 7.77 (d, *J* = 8.0 Hz, 2H), 7.57-7.55 (m, 1H), 7.42-7.37 (m, 4H), 2.47 (s, 3H); <sup>13</sup>C NMR (100 MHz, CDCl<sub>3</sub>) δ 187.0, 154.2, 142.0, 130.1, 129.3, 126.1, 126.0, 125.7, 125.0, 122.8, 111.3, 21.6; HRMS (ESI) calcd for C<sub>16</sub>H<sub>12</sub>O<sub>2</sub>Na [M+Na]<sup>+</sup> 259.0730, found 259.0727.

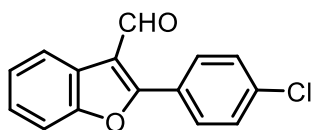

### 2-(4-Chlorophenyl)benzofuran-3-carbaldehyde (**5c**)

According to the general procedure, the reaction of **3c** (20.2 mg, 0.07 mmol) and *p*-TsOH•H<sub>2</sub>O (26.3 mg, 0.14 mmol) in (CF<sub>3</sub>)<sub>2</sub>CHOH (0.7 mL) gave **5c** (17.5 mg, 97%) as white solid. Reaction time: 25 min. Eluent of SiO<sub>2</sub> column chromatography:

Hexane/AcOEt = 2/1.

<sup>1</sup>H NMR (400 MHz, CDCl<sub>3</sub>) δ 10.35 (s, 1H), 8.28-8.26 (m, 1H), 7.83 (d, *J* = 8.4 Hz, 2H), 7.58-7.55 (m, 3H), 7.45-7.38 (m, 2H); <sup>13</sup>C NMR (100 MHz, CDCl<sub>3</sub>) δ 186.3, 154.3, 137.8, 130.4, 129.7, 127.3, 126.5, 125.6, 125.2, 122.9, 117.9, 111.4; HRMS (ESI) calcd for C<sub>15</sub>H<sub>10</sub>O<sub>2</sub>Cl [M+H]<sup>+</sup> 257.0364, found 257.0360.

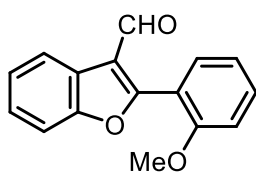

### 2-(2-Methoxyphenyl)benzofuran-3-carbaldehyde (**5d**)

According to the general procedure, the reaction of **3d** (60.0 mg, 0.21 mmol) and *p*-TsOH•H<sub>2</sub>O (81.2 mg, 0.42 mmol) in (CF<sub>3</sub>)<sub>2</sub>CHOH (2.1 mL) gave **5d** (48.6 mg, 91%) as white solid. Reaction time: 25 min. Eluent of SiO<sub>2</sub> column chromatography: Hexane/AcOEt

= 2/1.

<sup>1</sup>H NMR (400 MHz, CDCl<sub>3</sub>) δ 10.11 (s, 1H), 8.28-8.26 (m, 1H), 7.64 (dd, *J* = 7.6, 2.0 Hz, 1H), 7.57-7.52 (m, 2H), 7.39-7.37 (m, 2H), 7.14 (t, *J* = 7.6 Hz, 1H), 7.09 (d, *J* = 8.4 Hz, 1H), 3.87 (s, 3H); <sup>13</sup>C NMR (100 MHz, CDCl<sub>3</sub>) δ 188.0, 162.9, 157.6, 154.8, 132.8, 132.0, 125.8, 125.4, 124.8, 122.8, 121.1, 118.4, 117.9, 111.9, 111.3, 55.9; HRMS (ESI) calcd for C<sub>16</sub>H<sub>13</sub>O<sub>3</sub> [M+H]<sup>+</sup> 253.0859, found 253.0852.

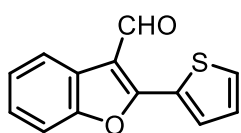

### 2-(Thiophen-2-yl)benzofuran-3-carbaldehyde (**5e**)

According to the general procedure, the reaction of **3e** (28.8 mg, 0.11 mmol) and *p*-TsOH·H<sub>2</sub>O (41.8 mg, 0.22 mmol) in (CF<sub>3</sub>)<sub>2</sub>CHOH (1.1 mL) gave **5e** (22.5 mg, 90%) as yellow solid. Reaction time: 40 min. Eluent of SiO<sub>2</sub> column chromatography: Hexane/AcOEt = 4/1.

<sup>1</sup>H NMR (400 MHz, CDCl<sub>3</sub>) δ 10.56 (s, 1H), 8.23-8.21 (m, 1H), 7.85 (d, *J* = 4.0 Hz, 1H), 7.64 (d, *J* = 5.2 Hz, 1H), 7.54-7.52 (m, 1H), 7.42-7.35 (m, 2H), 7.25-7.23 (m, 1H); <sup>13</sup>C NMR (100 MHz, CDCl<sub>3</sub>) δ 185.6, 154.0, 130.7, 130.5, 130.5, 128.6, 126.3, 125.8, 125.1, 122.5, 116.5, 111.2; HRMS (ESI) calcd for C<sub>13</sub>H<sub>9</sub>O<sub>2</sub>S [M+H]<sup>+</sup> 229.0318, found : 229.0315.

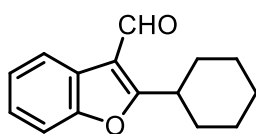

### 2-Cyclohexylbenzofuran-3-carbaldehyde (**5f**)

According to the general procedure, the reaction of **3f** (20.1 mg, 0.077 mmol) and *p*-TsOH·H<sub>2</sub>O (28.5 mg, 0.15 mmol) in (CF<sub>3</sub>)<sub>2</sub>CHOH (0.8 mL) gave **5f** (17.1 mg, 98%) as white solid. Reaction time: 25 min. Eluent of SiO<sub>2</sub> column chromatography: Hexane/AcOEt = 3/1.

<sup>1</sup>H NMR (400 MHz, CDCl<sub>3</sub>) δ 10.28 (s, 1H), 8.15-8.13 (m, 1H), 7.47-7.45 (m, 1H), 7.35-7.30 (m, 2H), 3.35-3.28 (m, 1H), 1.98-1.91 (m, 4H), 1.87-1.80 (m, 3H), 1.50-1.34 (m, 3H); <sup>13</sup>C NMR (100 MHz, CDCl<sub>3</sub>) δ 185.0, 174.5, 154.0, 125.2, 124.9, 124.6, 122.1, 116.2, 111.1, 37.1, 31.5, 26.1, 25.6; HRMS (ESI) calcd for C<sub>15</sub>H<sub>17</sub>O<sub>2</sub> [M+H]<sup>+</sup> 229.1223, found 229.1222.

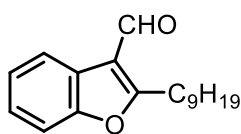

### 2-Nonylbenzofuran-3-carbaldehyde (**5g**)

According to the general procedure, the reaction of **3g** (13.1 mg, 0.043 mmol) and *p*-TsOH·H<sub>2</sub>O (16.4 mg, 0.086 mmol) in (CF<sub>3</sub>)<sub>2</sub>CHOH (0.5 mL) gave **5g** (9.1 mg, 78%) as yellow oil. Reaction time: 30 min. Eluent of SiO<sub>2</sub> column chromatography: Hexane/AcOEt = 10/1.

<sup>1</sup>H NMR (600 MHz, CDCl<sub>3</sub>) δ 10.23 (s, 1H), 8.14-8.13 (m, 1H), 7.47-7.46 (m, 1H), 7.34-7.32 (m, 2H), 3.10 (t, *J* = 7.8 Hz, 2H), 1.87-1.82 (m, 2H), 1.42-1.26 (m, 12H), 0.88 (t, *J* = 7.2 Hz, 3H); <sup>13</sup>C NMR (151 MHz, CDCl<sub>3</sub>) δ 185.0, 170.9, 154.1, 125.3, 124.8, 124.6, 121.9, 117.7, 111.0, 32.0, 29.5, 29.4, 29.37, 29.35, 28.4, 27.3, 22.8, 14.2; HRMS (ESI) calcd for C<sub>18</sub>H<sub>25</sub>O<sub>2</sub> [M+H]<sup>+</sup> : 273.1849, found : 273.1849.

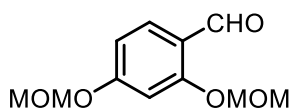

### 2,4-Bis(methoxymethoxy)benzaldehyde (**6**)<sup>2</sup>

To the solution of 2,4-dihydroxybenzaldehyde (2.00 g, 14.5 mmol) in DCM (30 mL) was added MOMCl (3.3 mL, 43.5 mmol) and *i*-Pr<sub>2</sub>NEt (10.1 mL, 72.4 mmol) at room temperature. After stirring at same temperature for 2.5 h, the reaction was quenched with MeOH, and the resulting solution was extracted with CHCl<sub>3</sub>. The combined organic layer was washed with brine, dried over Na<sub>2</sub>SO<sub>4</sub> and concentrated *in vacuo*. The residue was purified by SiO<sub>2</sub> column chromatography (Hexane/AcOEt = 10/1) to give **6** (3.18 g, 97%) as white solid.

<sup>1</sup>H NMR (400 MHz, CDCl<sub>3</sub>) δ 10.35 (s, 1H), 7.81 (d, *J* = 8.8 Hz, 1H), 6.83 (d, *J* = 2.4 Hz, 1H), 6.75 (dd, *J* = 8.8, 2.4 Hz, 1H), 5.28 (s, 2H), 5.22 (s, 2H), 3.53 (s, 3H), 3.49 (s, 3H).

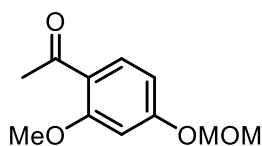

### 1-(2-Methoxy-4-(methoxymethoxy)phenyl)ethan-1-one (7)

To the solution of 2,4-dihydroxyacetophenone (1.27 g, 9.2 mmol) in acetone (9.2 mL) was added  $K_2CO_3$  (3.17 g, 23 mmol) and MOMCl (1.4 mL, 18.4 mmol). After stirring at room temperature for 17 h, the reaction was quenched with MeOH, and the resulting solution was extracted with AcOEt. The combined organic layer was washed with brine, dried over  $Na_2SO_4$  and concentrated under the reduced pressure. The residue was purified by  $SiO_2$  column chromatography (Hexane/AcOEt = 6/1) to give 1-(2-hydroxy-4-(methoxymethoxy)phenyl)-ethan-1-one (1.41 g, 80%) as colorless oil. To the solution of 1-(2-hydroxy-4-(methoxymethoxy)phenyl)-ethan-1-one (1.40 g, 7.1 mmol) in dry DMF (3.6 mL) was added  $K_2CO_3$  (2.78 g, 21.3 mmol) and MeI (0.53 mL, 8.5 mmol) under Ar. After stirring at 80 °C for 0.5 h, the reaction was quenched with  $H_2O$ , and the resulting solution was extracted with AcOEt. The combined organic layer was washed with brine, dried over  $Na_2SO_4$  and concentrated under the reduced pressure. The residue was purified by  $SiO_2$  column chromatography (Hexane/AcOEt = 4/1) to give **7** (1.34 g, 88%) as yellow oil.

$^1H$  NMR (400 MHz,  $CDCl_3$ )  $\delta$  7.80 (d,  $J$  = 8.8 Hz, 1H), 6.65 (dd,  $J$  = 8.8, 2.0 Hz, 1H), 6.61 (d,  $J$  = 2.0 Hz, 1H), 5.21 (s, 2H), 3.89 (s, 3H), 3.49 (s, 3H), 2.57 (s, 3H);  $^{13}C$  NMR (100 MHz,  $CDCl_3$ )  $\delta$  197.3, 162.0, 160.8, 132.1, 121.5, 107.3, 99.5, 93.8, 55.8, 55.1, 31.4; HRMS (ESI) calcd for  $C_{11}H_{14}O_4Na$   $[M+Na]^+$  : 233.0784, found : 233.0777.

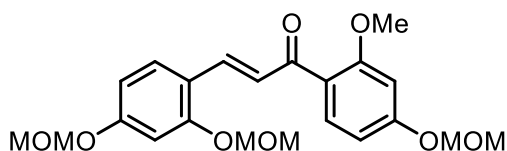

### (E)-3-(2,4-Bis(methoxymethoxy)phenyl)-1-(2-methoxy-4-(methoxymethoxy)phenyl)prop-2-en-1-one (8)

To the solution of **6** (1.27 g, 5.6 mmol) and **7** (1.30 g, 6.2 mmol) in EtOH (10 mL) was added KOH (1.11 g, 16.8 mmol) at room temperature, then stirred for 22 h. The reaction was quenched with  $H_2O$ , and the resulting solution was extracted with  $CH_2Cl_2$ , washed with brine, dried over  $Na_2SO_4$  and concentrated under the reduced pressure. The residue was purified by  $SiO_2$  column chromatography (Hexane/AcOEt = 2/1) to give **8** (2.09 g, 89%) as yellow oil.

$^1H$  NMR (400 MHz,  $CDCl_3$ )  $\delta$  7.99 (d,  $J$  = 16.0 Hz, 1H), 7.70 (d,  $J$  = 8.4 Hz, 1H), 7.55 (d,  $J$  = 8.4 Hz, 1H), 7.44 (d,  $J$  = 16.0 Hz, 1H), 6.84 (d,  $J$  = 2.4 Hz, 1H), 6.73-6.68 (m, 2H), 6.64 (d,  $J$  = 2.0 Hz, 1H), 5.23 (s, 2H), 5.22 (s, 2H), 5.19 (s, 2H), 3.89 (s, 3H), 3.50 (s, 3H), 3.49 (s, 3H), 3.48 (s, 3H);  $^{13}C$  NMR (100 MHz,  $CDCl_3$ )  $\delta$  191.2, 161.5, 160.2, 160.1, 157.6, 137.3, 132.5, 129.5, 125.8, 123.5, 119.1, 109.3, 107.7, 103.4, 100.1, 94.6, 94.3, 94.2, 56.3, 56.2, 56.1, 55.7; HRMS (ESI): calcd for  $C_{22}H_{26}O_8Na$   $[M+Na]^+$  : 441.1520, found 441.1501.

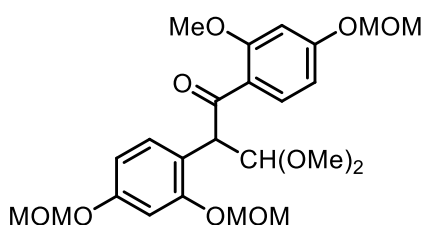

### 2-(2,4-Bis(methoxymethoxy)phenyl)-3,3-dimethoxy-1-(2-methoxy-4-(methoxymethoxy)phenyl)propan-1-one (9)

To the solution of **8** (53.9 mg, 0.13 mmol) in MeOH (1.3 mL) was added  $PhI(OCOCF_3)_2$  (83.1 mg, 0.19 mmol) at room temperature, then stirred at same temperature for 3 h. The reaction was extracted with  $CHCl_3$ , washed with brine, dried over  $Na_2SO_4$  and concentrated under the reduced pressure. The residue was purified by  $SiO_2$  column chromatography (Hexane/AcOEt = 2/1) to give **9** (42.3 mg, 69%) as yellow oil.

$^1H$  NMR (400 MHz,  $CDCl_3$ )  $\delta$  7.69 (d,  $J$  = 8.4 Hz, 1H), 7.28 (d,  $J$  = 8.4 Hz, 1H), 6.76 (d,  $J$  = 2.4 Hz, 1H), 6.63 (dd,  $J$  = 8.4, 2.4 Hz, 1H), 6.56 (dd,  $J$  = 8.4, 2.4 Hz, 1H), 6.50 (d,  $J$  = 2.0 Hz, 1H), 5.44 (d,  $J$  = 8.4 Hz, 1H), 5.16 (s, 2H), 5.13 (s, 2H), 5.11 (s, 2H), 5.06 (d,  $J$  = 8.4 Hz, 1H), 3.81 (s, 3H), 3.46 (s, 3H), 3.449 (s, 3H), 3.446 (s, 3H), 3.44 (s, 3H), 3.20 (s, 3H);  $^{13}C$  NMR (100 MHz,  $CDCl_3$ )  $\delta$  198.4, 161.8, 160.6, 157.5, 156.4, 133.0, 130.1, 122.3, 118.6, 109.0,

107.3, 107.1, 103.8, 100.1, 95.1, 94.7, 94.2, 56.3, 56.2, 56.1, 56.0, 55.6, 54.4, 51.9; HRMS (ESI): calcd for  $C_{24}H_{32}O_{10}Na$   $[M+Na]^+$  : 503.1893, found 503.1866.

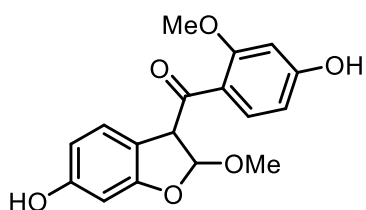

**(6-Hydroxy-2-methoxy-2,3-dihydrobenzofuran-3-yl)(4-hydroxy-2-methoxyphenyl)methanone (10)**

To the solution of **9** (49.8 mg, 0.10 mmol) in MeCN (1.0 mL) was added *p*-TsOH·H<sub>2</sub>O (3.9 mg, 0.02 mmol) and then stirred at 0 °C. After stirring for 1 h, *p*-TsOH·H<sub>2</sub>O (74.8 mg, 0.38 mmol) and EtOH (36 μL, 0.6 mmol) was added, and then stirred at 10 °C for 2.5 h. The reaction was quenched with saturated aq. NaHCO<sub>3</sub> and the mixture was extracted with AcOEt. The combined organic layer was washed with brine, dried over Na<sub>2</sub>SO<sub>4</sub> and concentrated under the reduced pressure. The residue was purified by SiO<sub>2</sub> column chromatography (Hexane/AcOEt = 2:1) to give **10** (17.8, 54%) as yellow foam.

<sup>1</sup>H NMR (600 MHz, MeOD) δ 7.37 (d, *J* = 8.4 Hz, 1H), 6.54 (d, *J* = 8.4 Hz, 1H), 6.35 (d, *J* = 1.2 Hz, 1H), 6.24 (dd, *J* = 9.0, 2.4 Hz, 1H), 6.06 (s, 1H), 6.01 (dd, *J* = 7.8, 1.8 Hz, 1H), 5.67 (d, *J* = 1.8 Hz, 1H), 4.90 (s, 1H), 3.72 (s, 3H); <sup>13</sup>C NMR (151 MHz, MeOD) δ 197.7, 165.7, 162.9, 160.9, 159.9, 134.5, 126.1, 118.9, 117.5, 111.1, 109.4, 108.9, 100.0, 98.7, 61.0, 56.3, 56.0; HRMS (ESI): calcd for  $C_{17}H_{16}O_6Na$   $[M+Na]^+$  339.0839, found 339.0840.

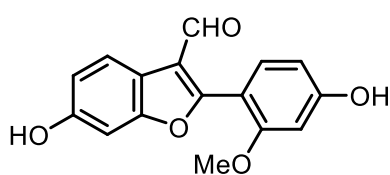

**Puerariafuran<sup>3)</sup>**

According to the general procedure, the reaction of **10** (16.2 mg, 0.051 mmol) and *p*-TsOH·H<sub>2</sub>O (19.5 mg, 0.10 mmol) in (CF<sub>3</sub>)<sub>2</sub>CHOH (0.5 mL) gave puerariafuran (11.7 mg, 81%) as a yellow solid. Reaction time: 1 h. Eluent of SiO<sub>2</sub> column chromatography: Hexane/AcOEt = 2/1.

<sup>1</sup>H NMR (600 MHz, DMSO-*d*<sub>6</sub>) δ 10.24 (brs, 1H), 9.89 (s, 1H), 9.77 (brs, 1H), 7.83 (d, *J* = 8.4 Hz, 1H), 7.46 (d, *J* = 8.4 Hz, 1H), 6.99 (s, 1H), 6.85 (d, *J* = 8.4 Hz, 1H), 6.61 (s, 1H), 6.55 (d, *J* = 8.4 Hz, 1H), 3.77 (s, 3H); <sup>13</sup>C NMR (151 MHz, DMSO-*d*<sub>6</sub>) δ 187.1, 162.3, 161.6, 158.6, 156.3, 154.8, 132.7, 121.6, 116.5, 113.5, 108.0, 107.8, 99.7, 97.6, 55.6; HRMS (ESI): calcd for  $C_{16}H_{12}O_5Na$   $[M+Na]^+$  307.0577, found 307.0556.

## References

- 1) Bresser, T.; Mosrin, M.; Monzon, G.; Knochel, P. *J. Org. Chem.* **2010**, *75*, 4686.
- 2) Jogireddy, R.; Maier, M. E. *J. Org. Chem.* **2006**, *71*, 6999.
- 3) Jang, D. S.; Kim, J. M.; Lee, Y. M.; Kim, Y. S.; Kim, J.-H.; Kim, J. S. *Chem. Pharm. Bull.* **2006**, *54*, 1315.

# <sup>1</sup>H NMR 1a

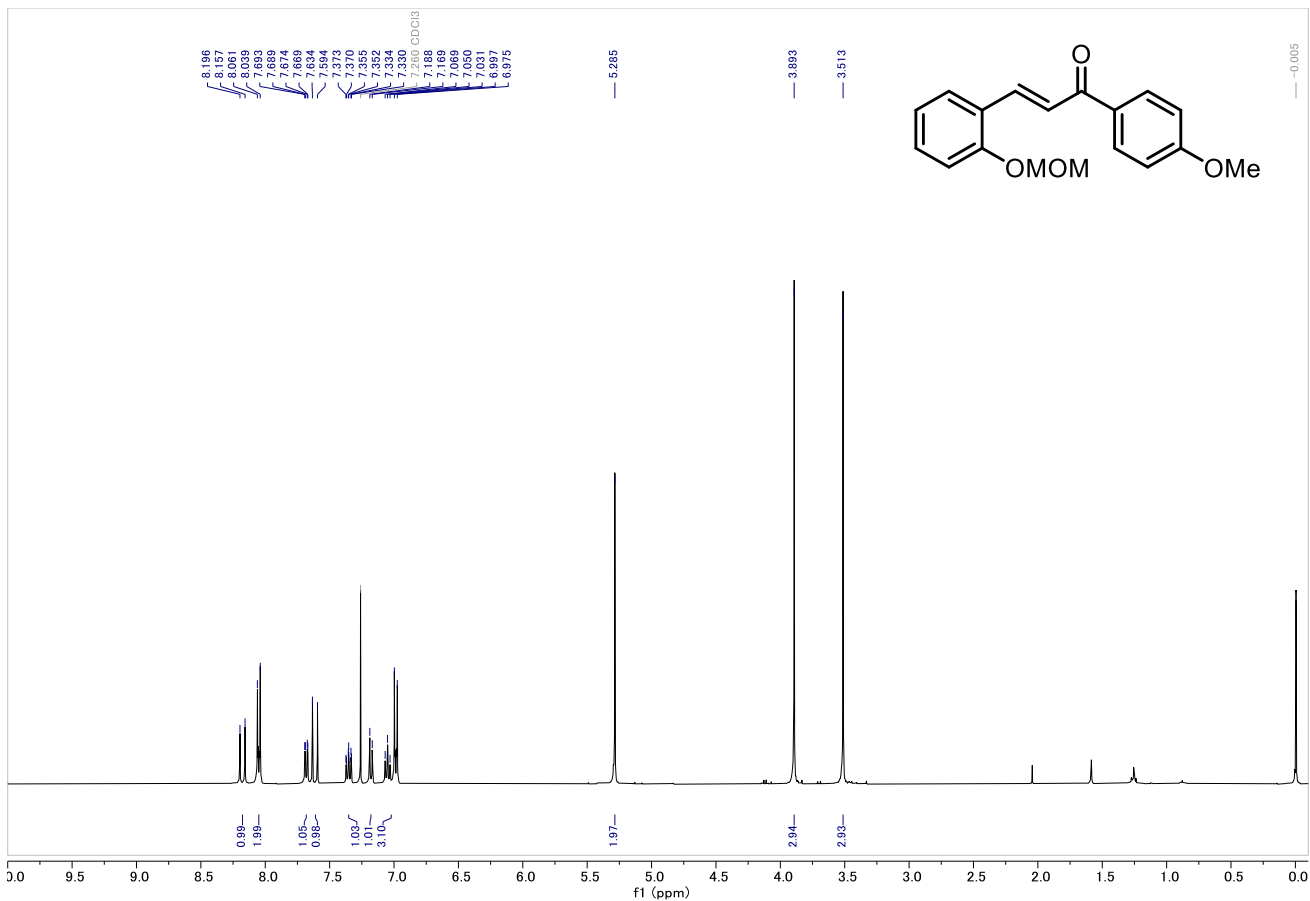

# <sup>13</sup>C NMR 1a

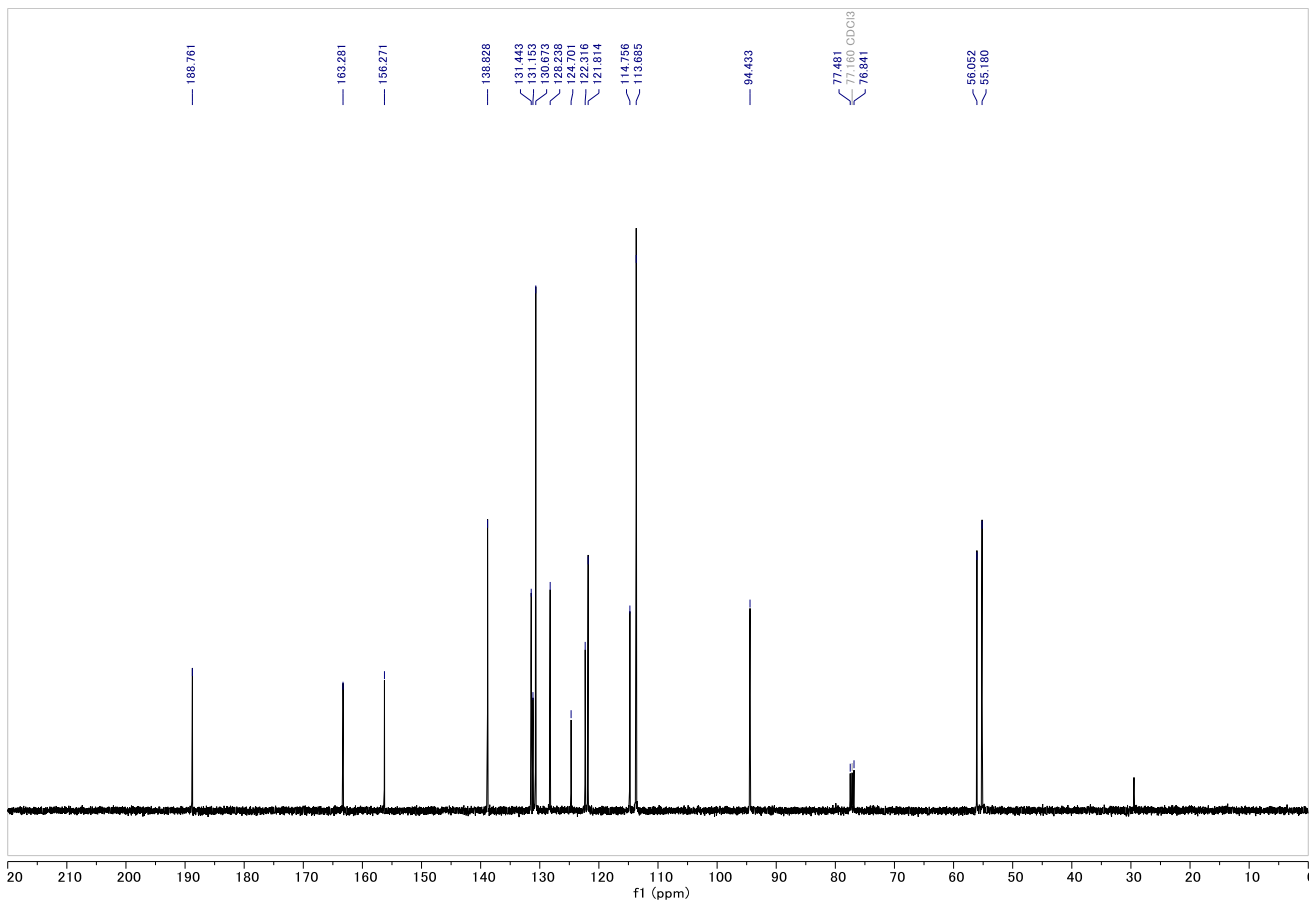

# <sup>1</sup>H NMR **1b**

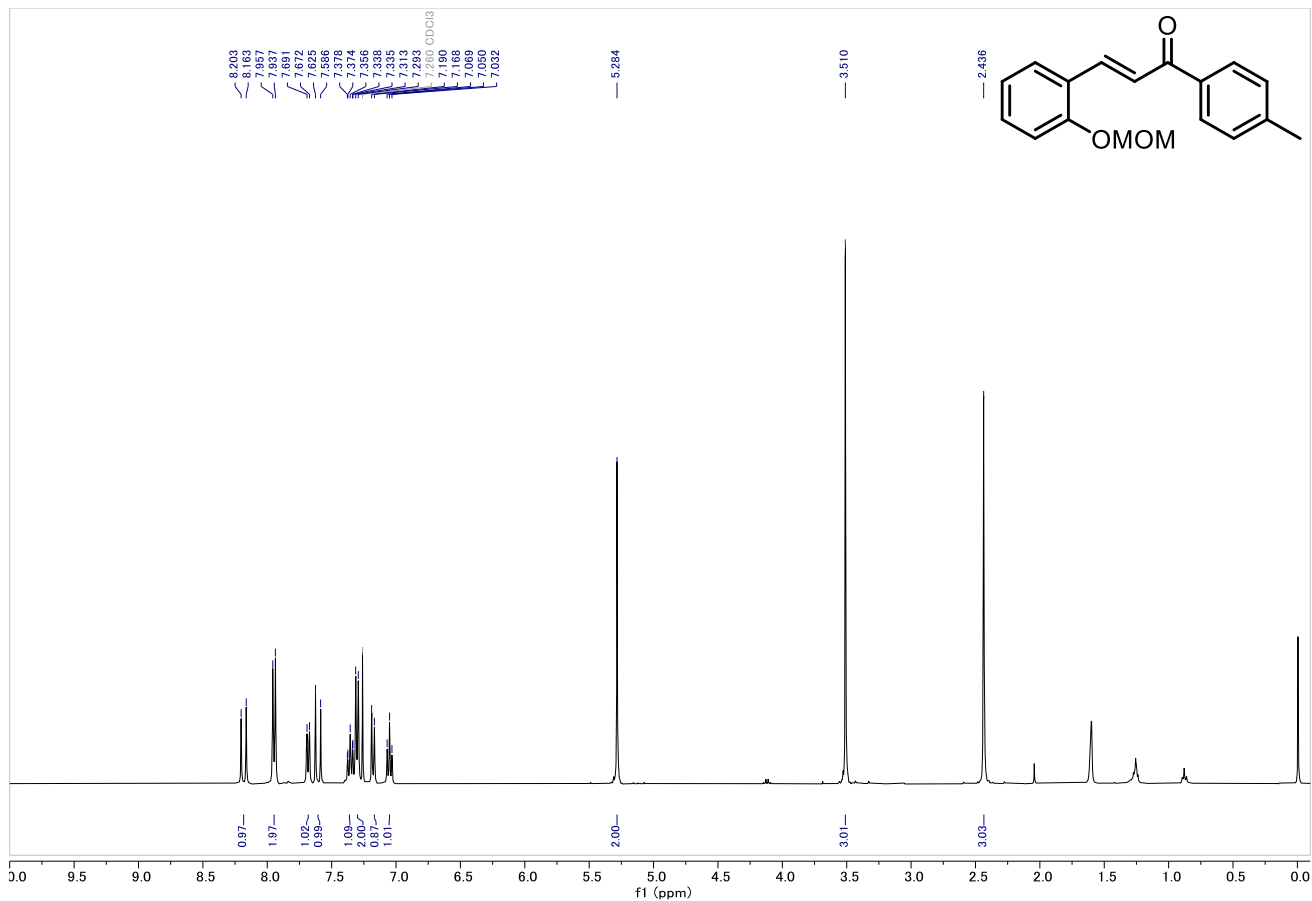

# <sup>13</sup>C NMR **1b**

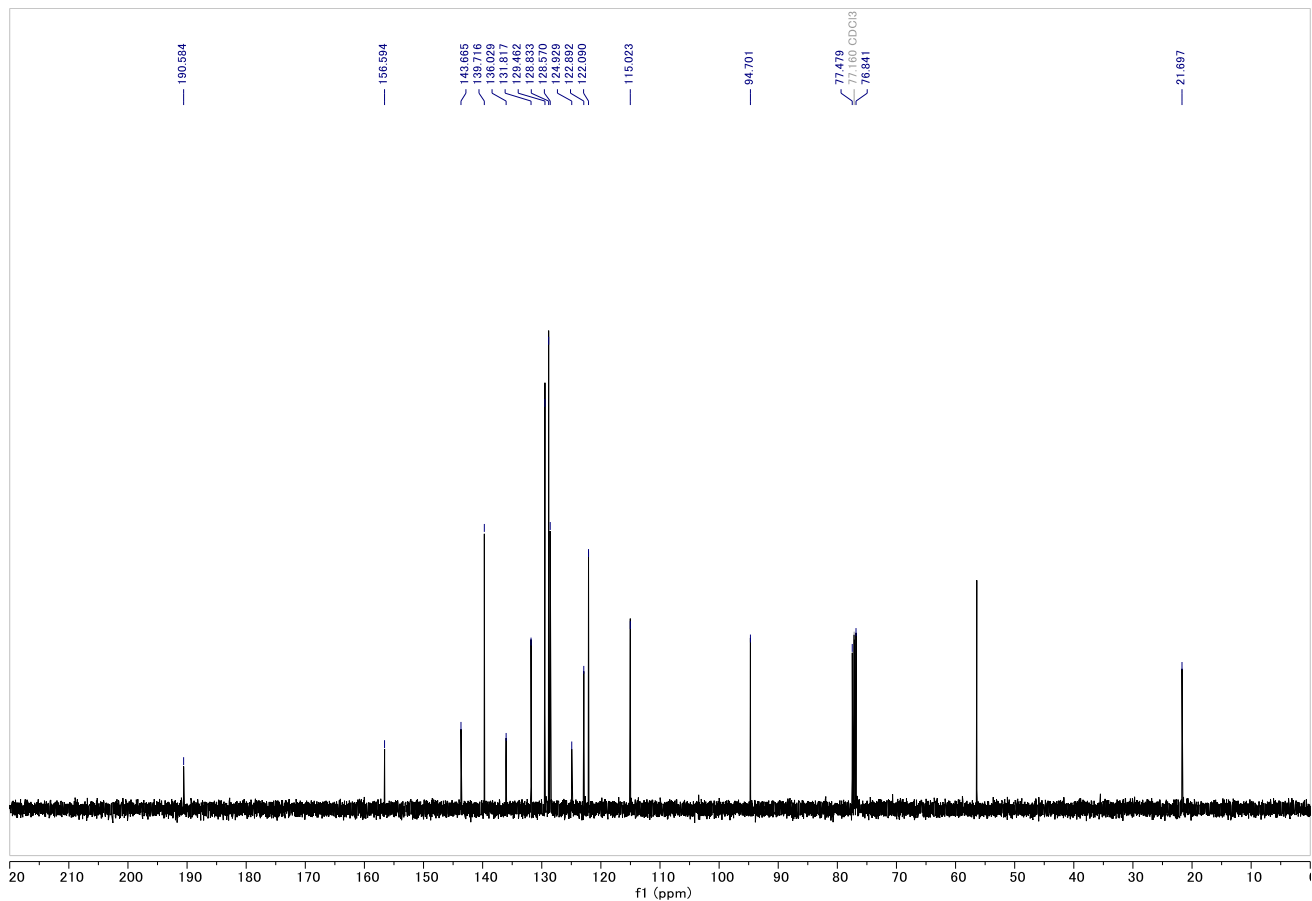

# <sup>1</sup>H NMR 1c

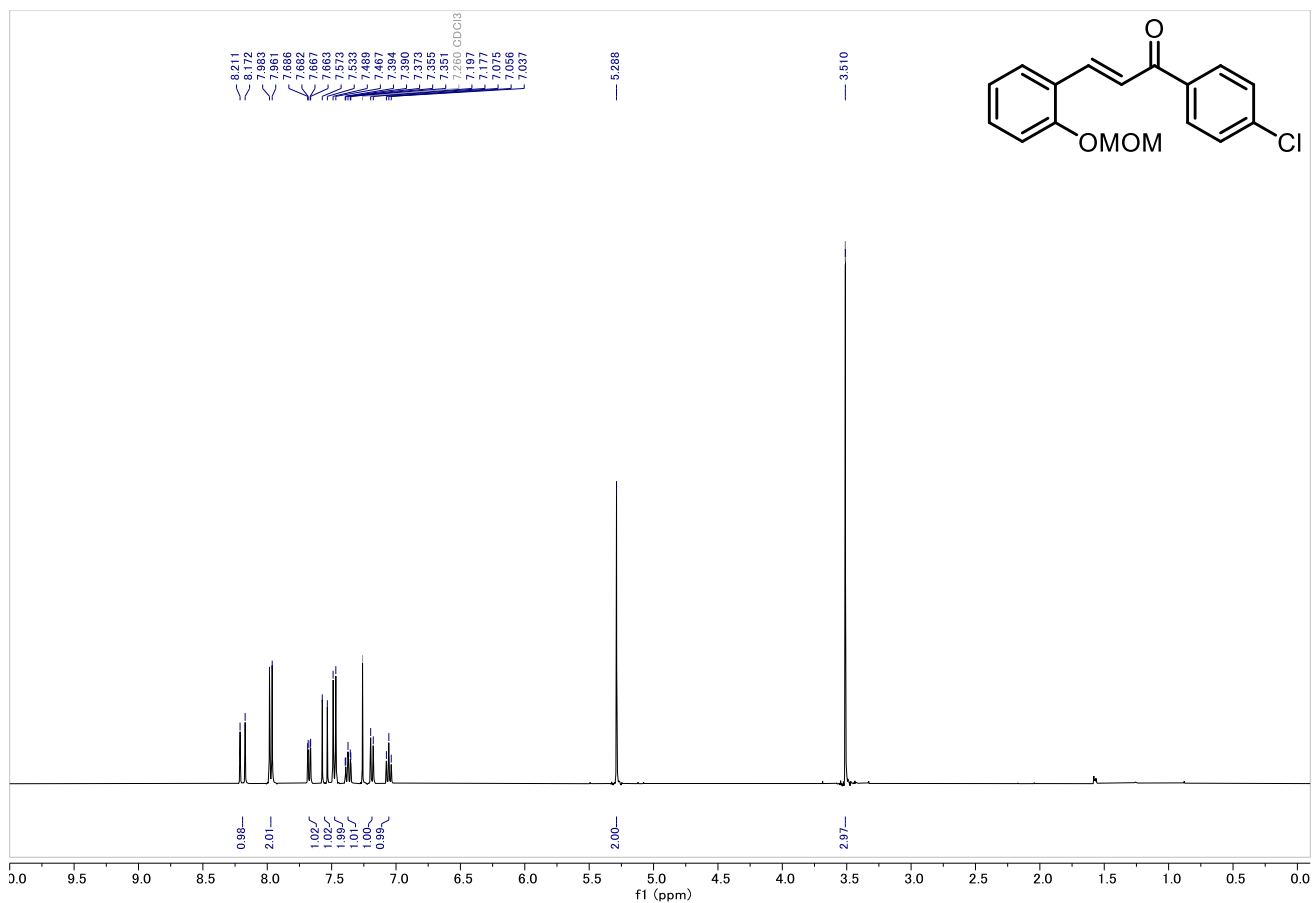

# <sup>13</sup>C NMR 1c

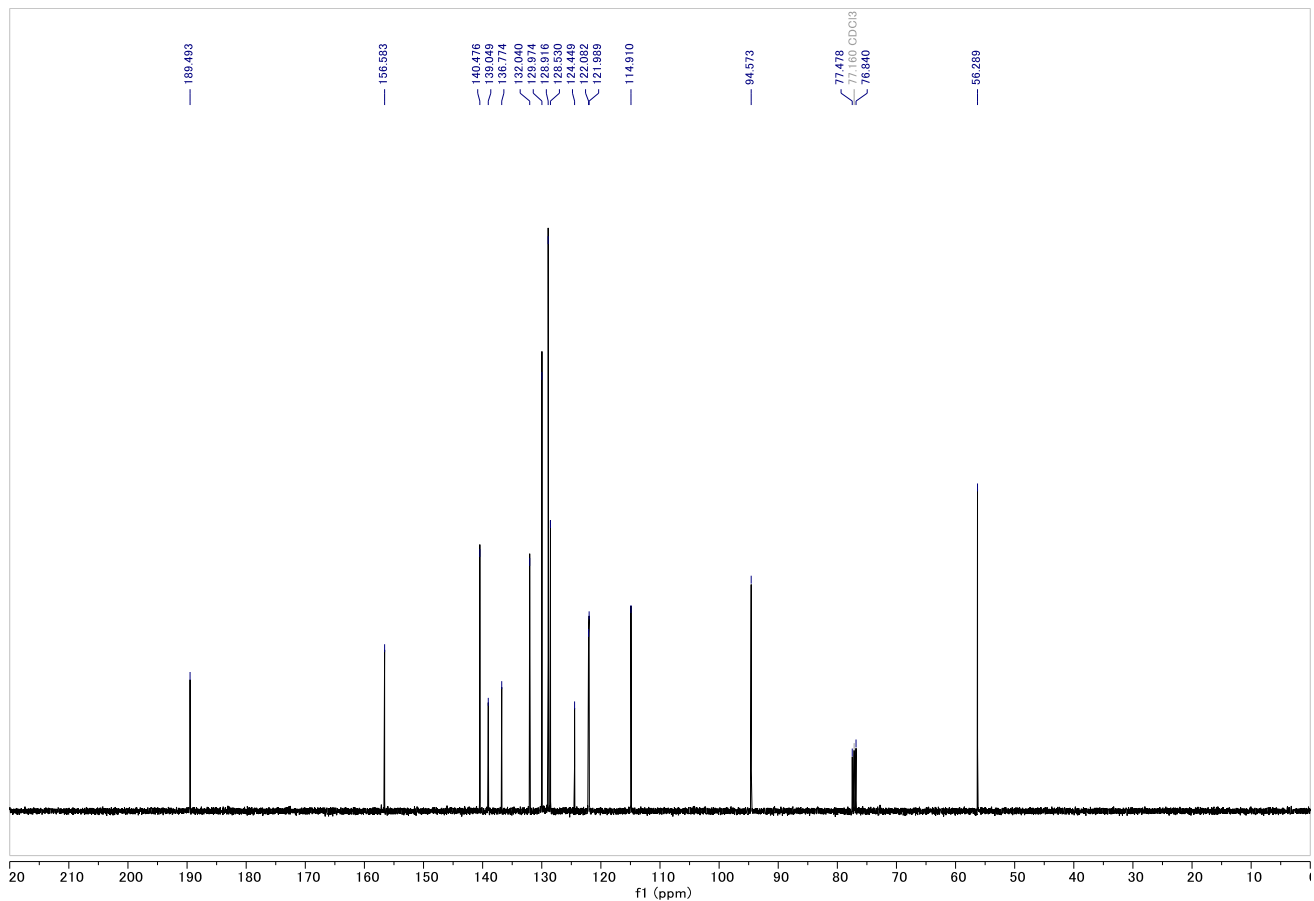



# <sup>1</sup>H NMR 1d

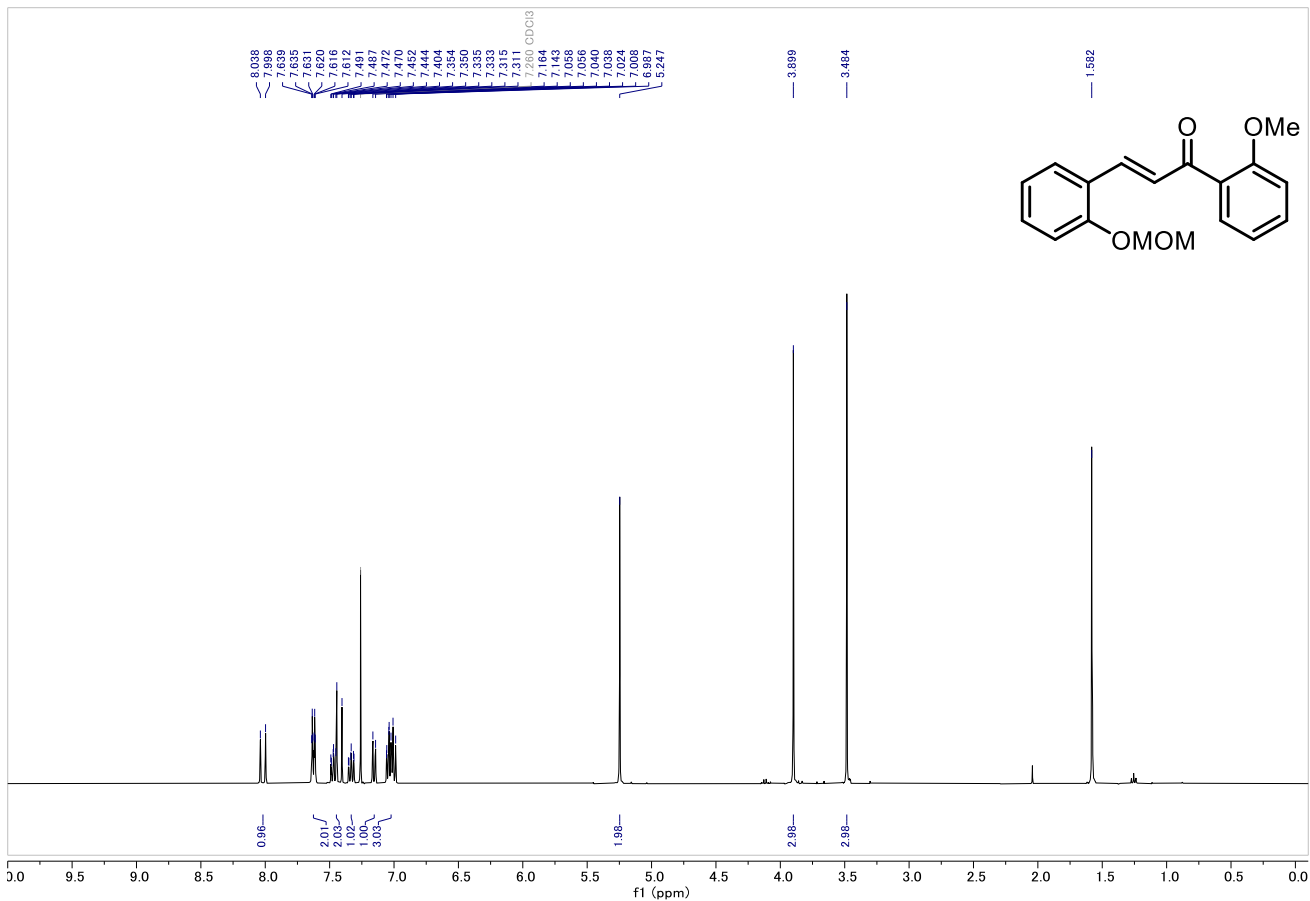

# <sup>13</sup>C NMR 1d

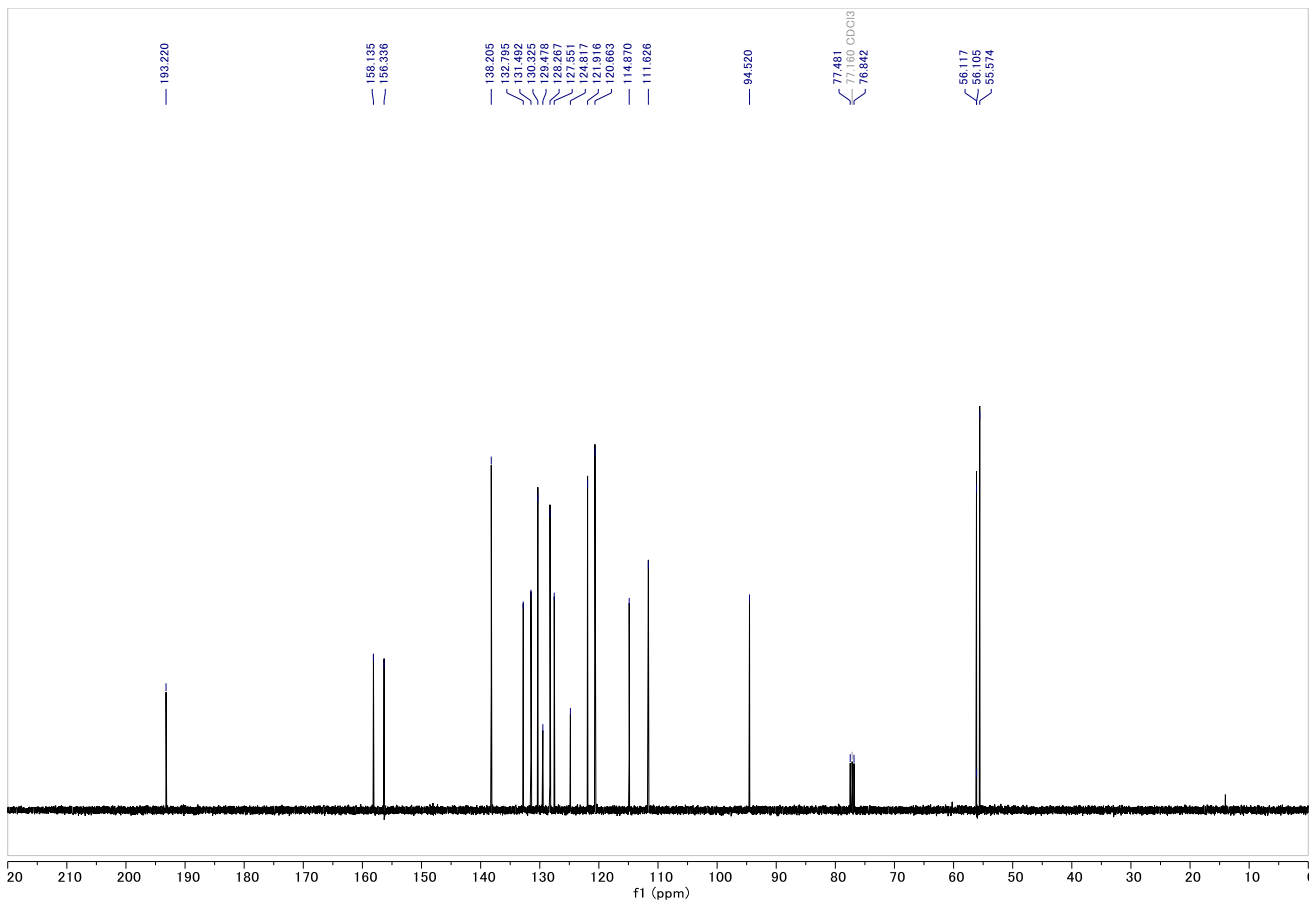

# <sup>1</sup>H NMR 1e

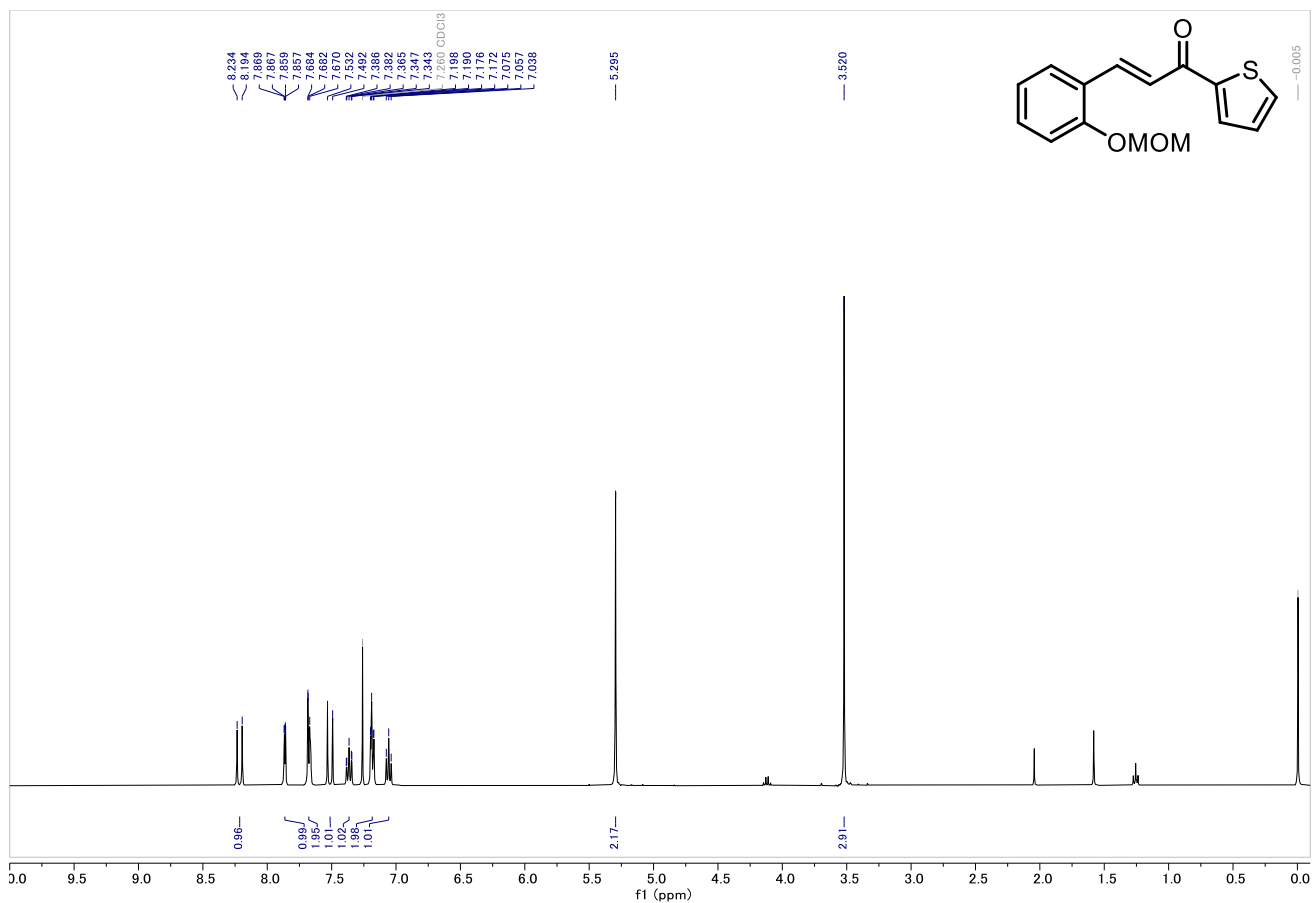

# <sup>13</sup>C NMR 1e

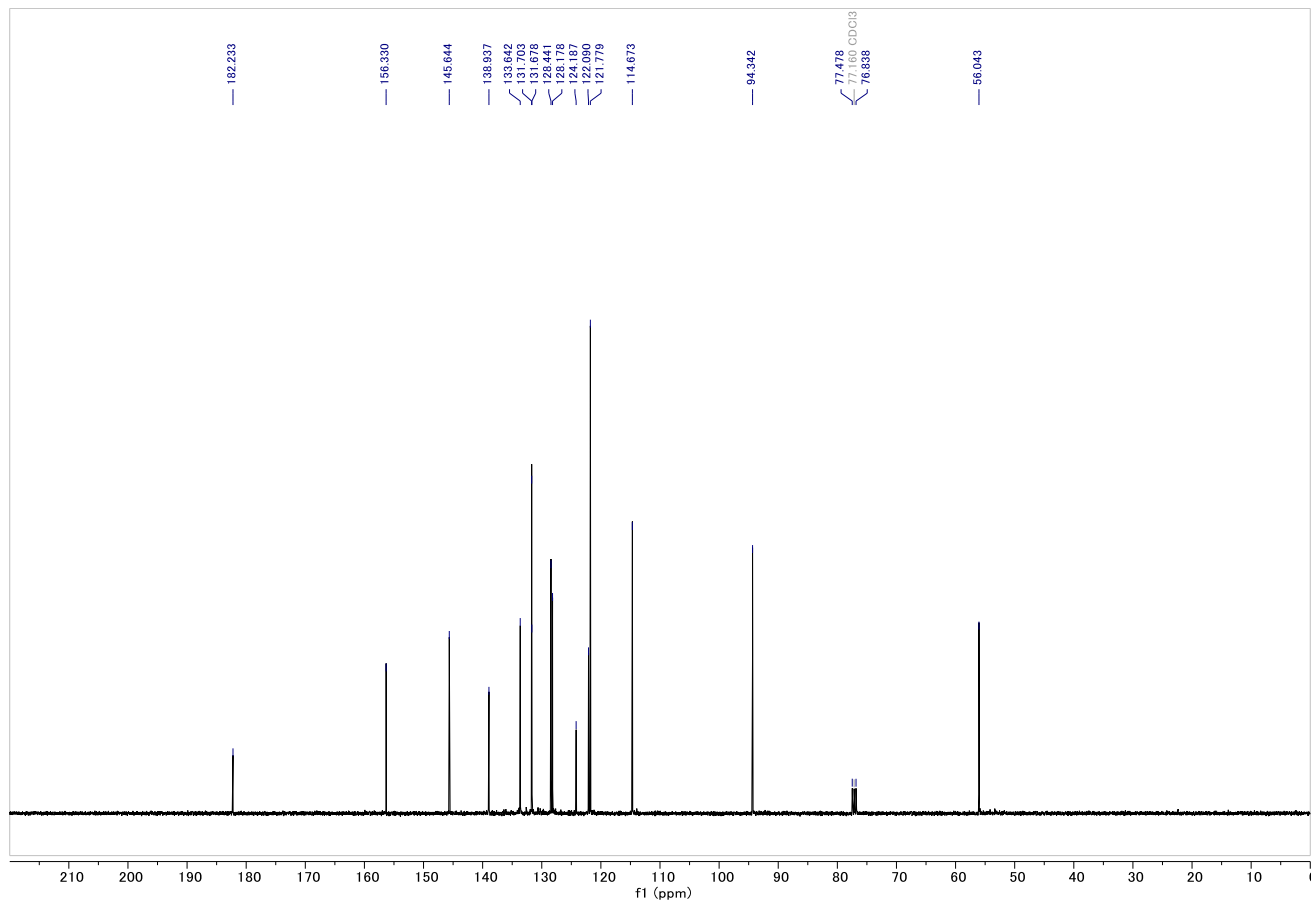

# <sup>1</sup>H NMR **1f**

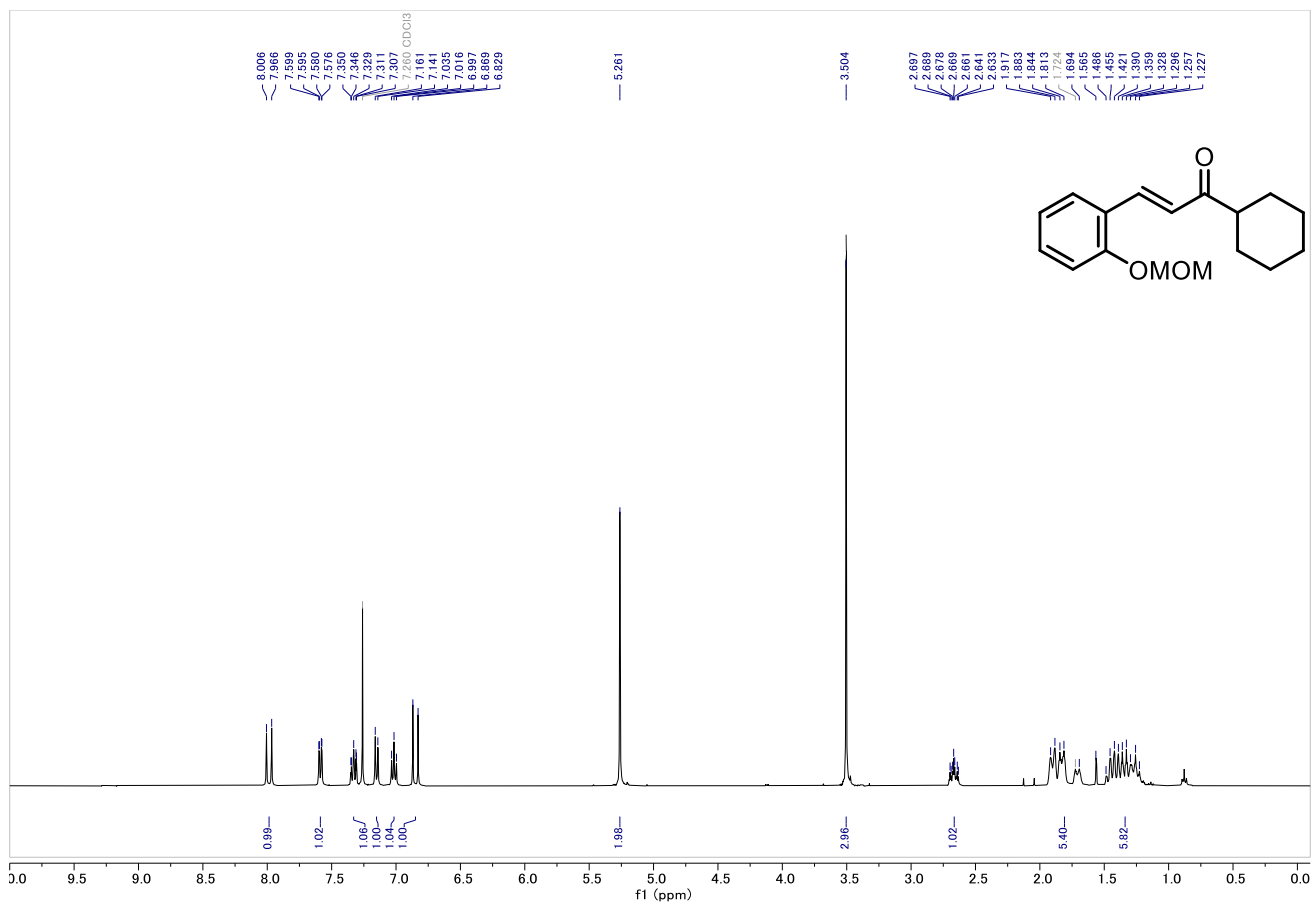

# <sup>13</sup>C NMR **1f**

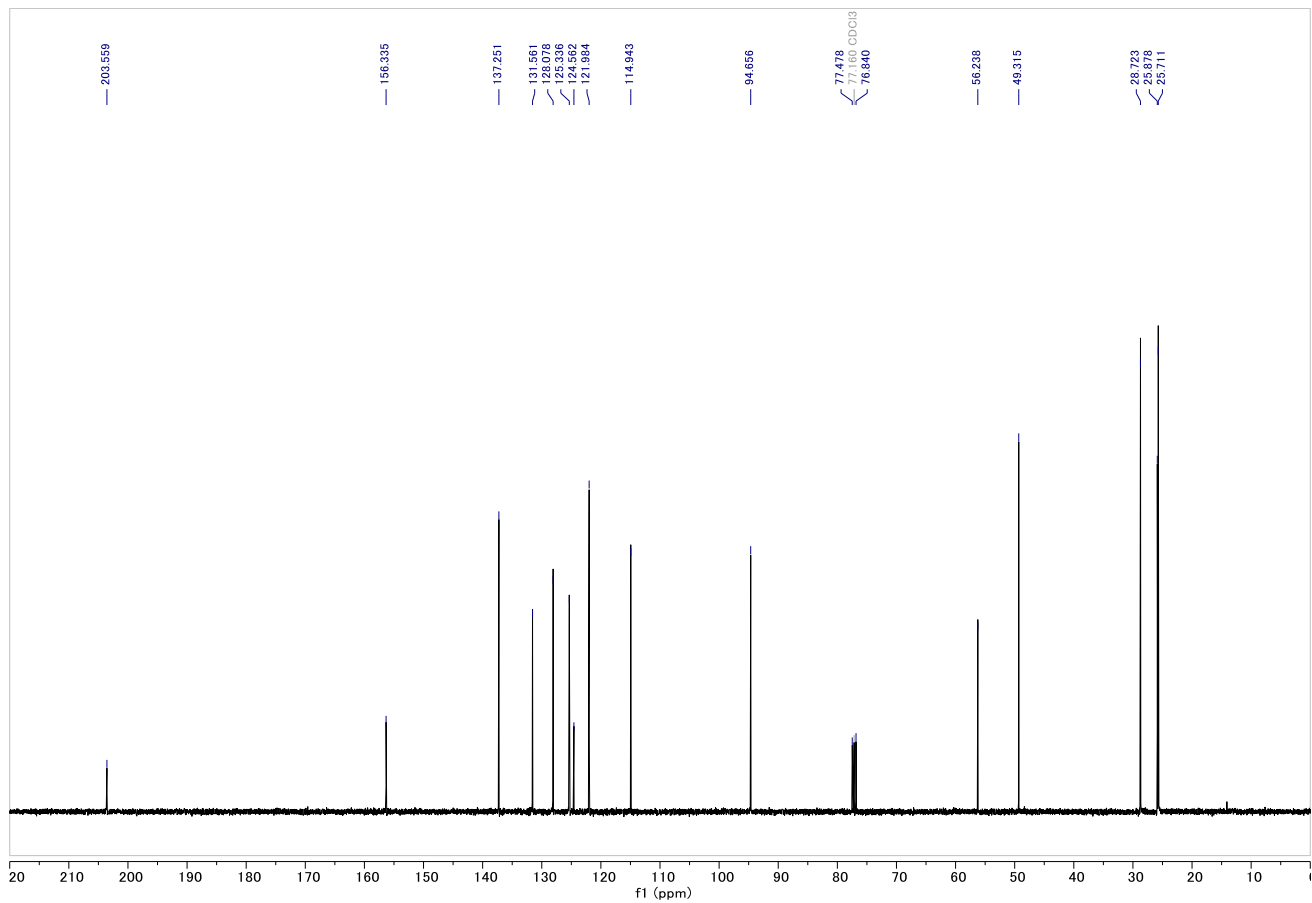

# <sup>1</sup>H NMR **1g**

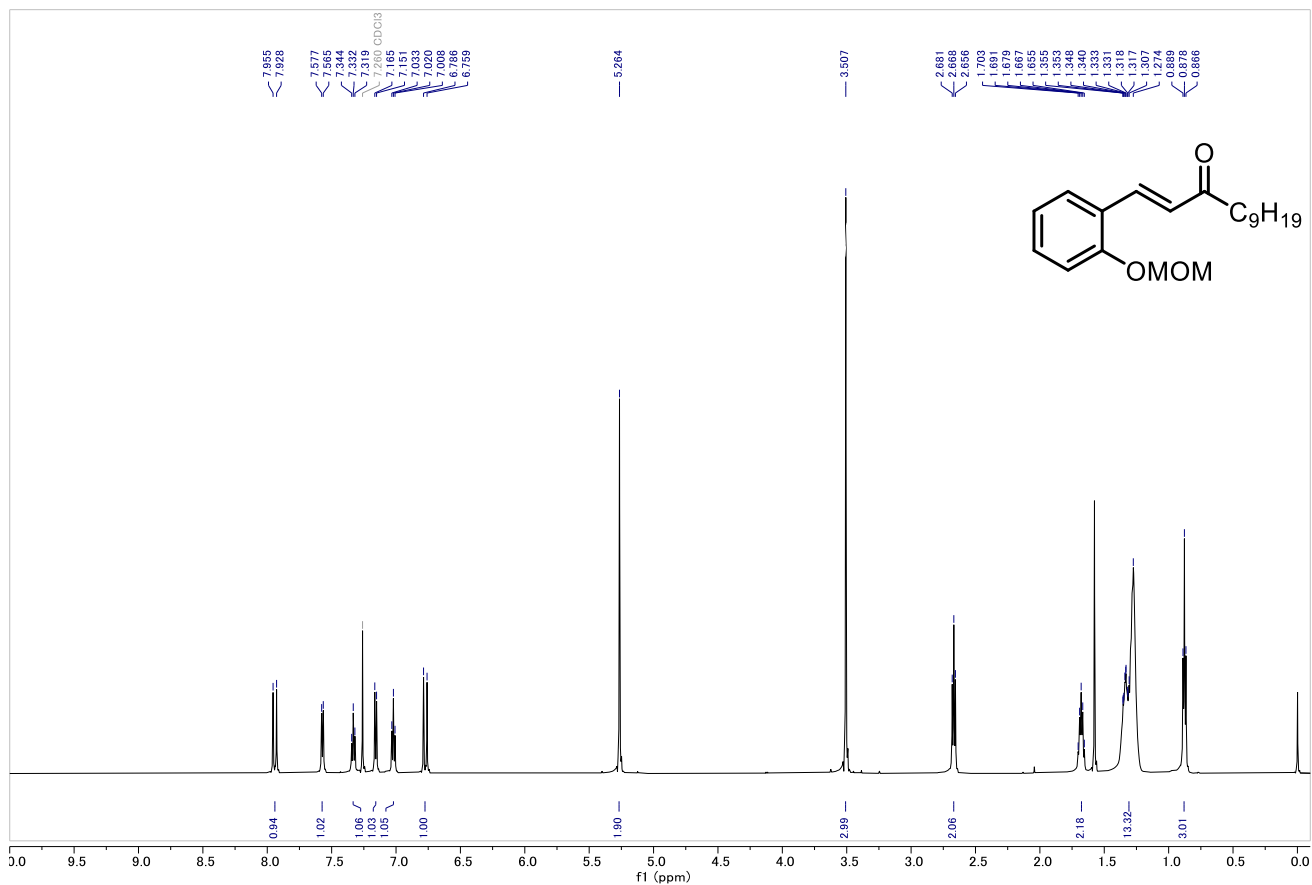

# <sup>13</sup>C NMR **1g**

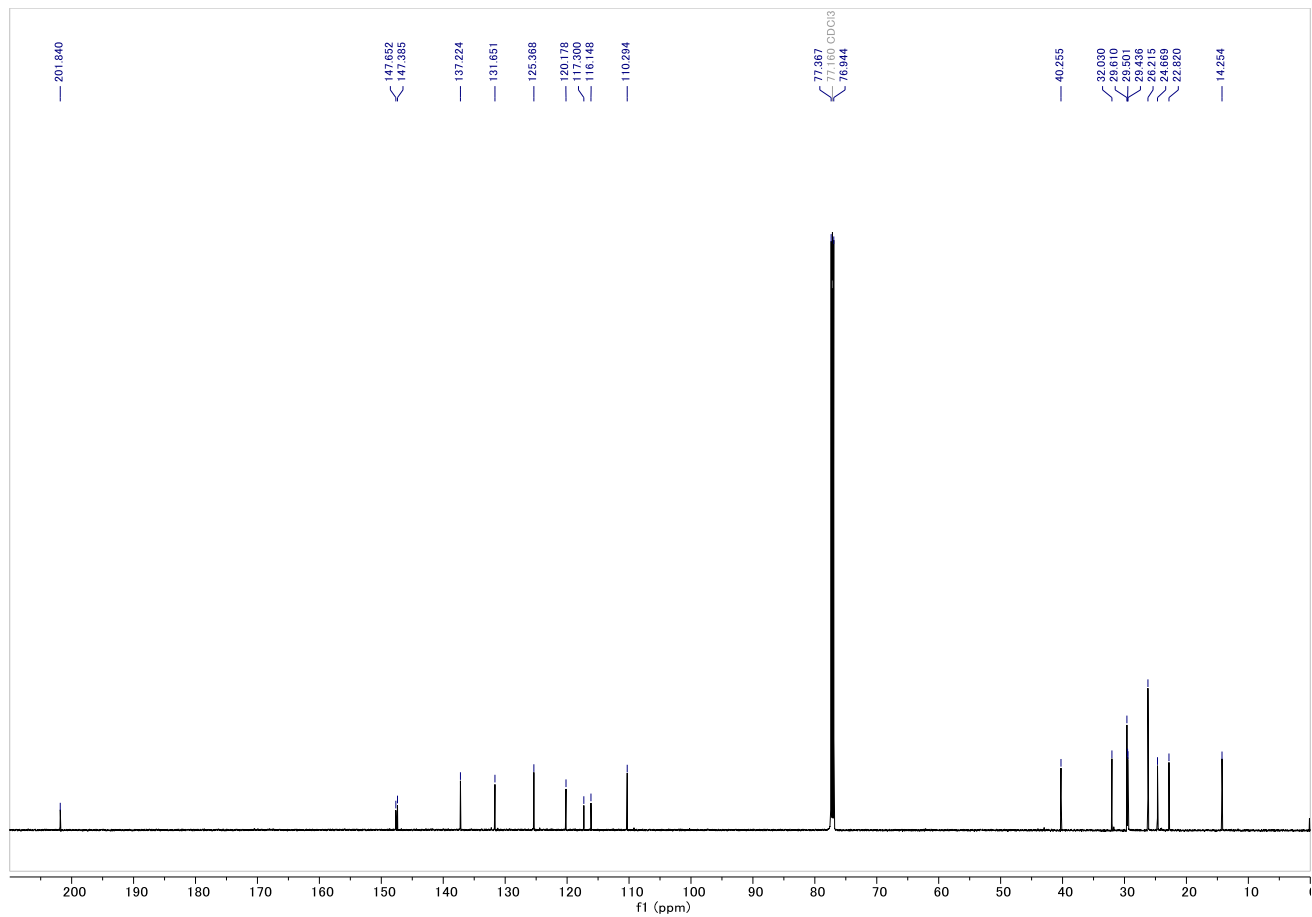

# <sup>1</sup>H NMR 2a

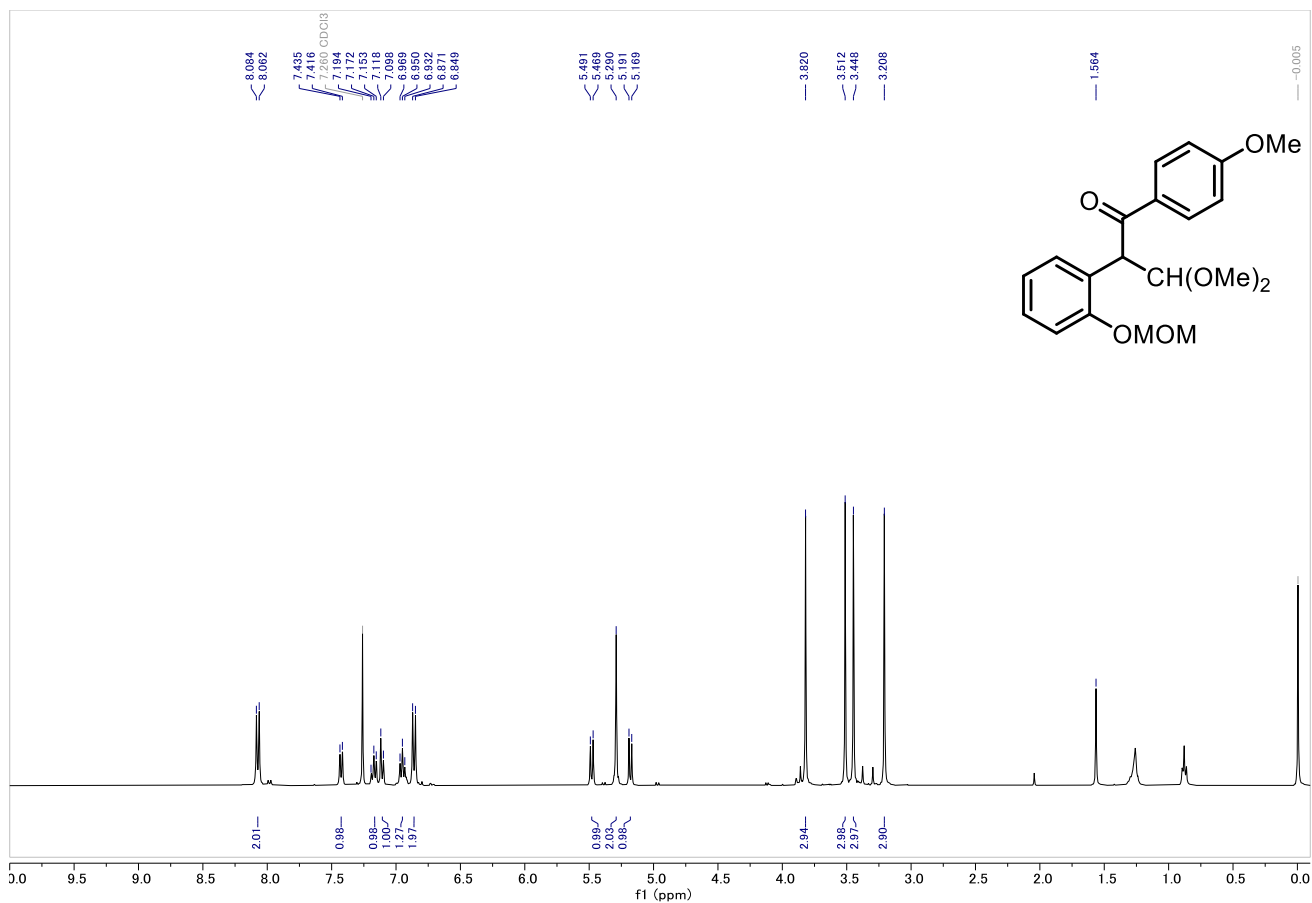

# <sup>13</sup>C NMR 2a

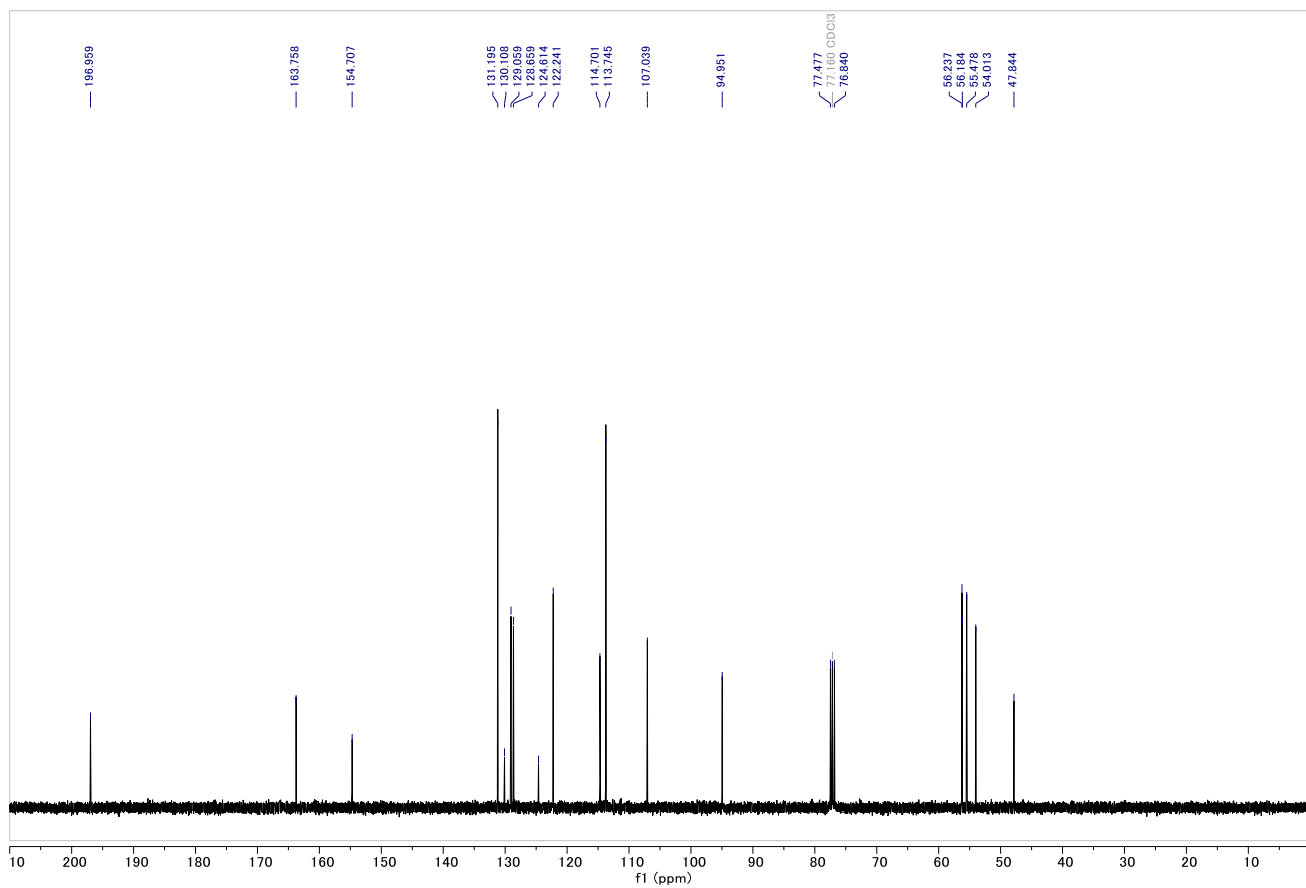

# <sup>1</sup>H NMR 2b

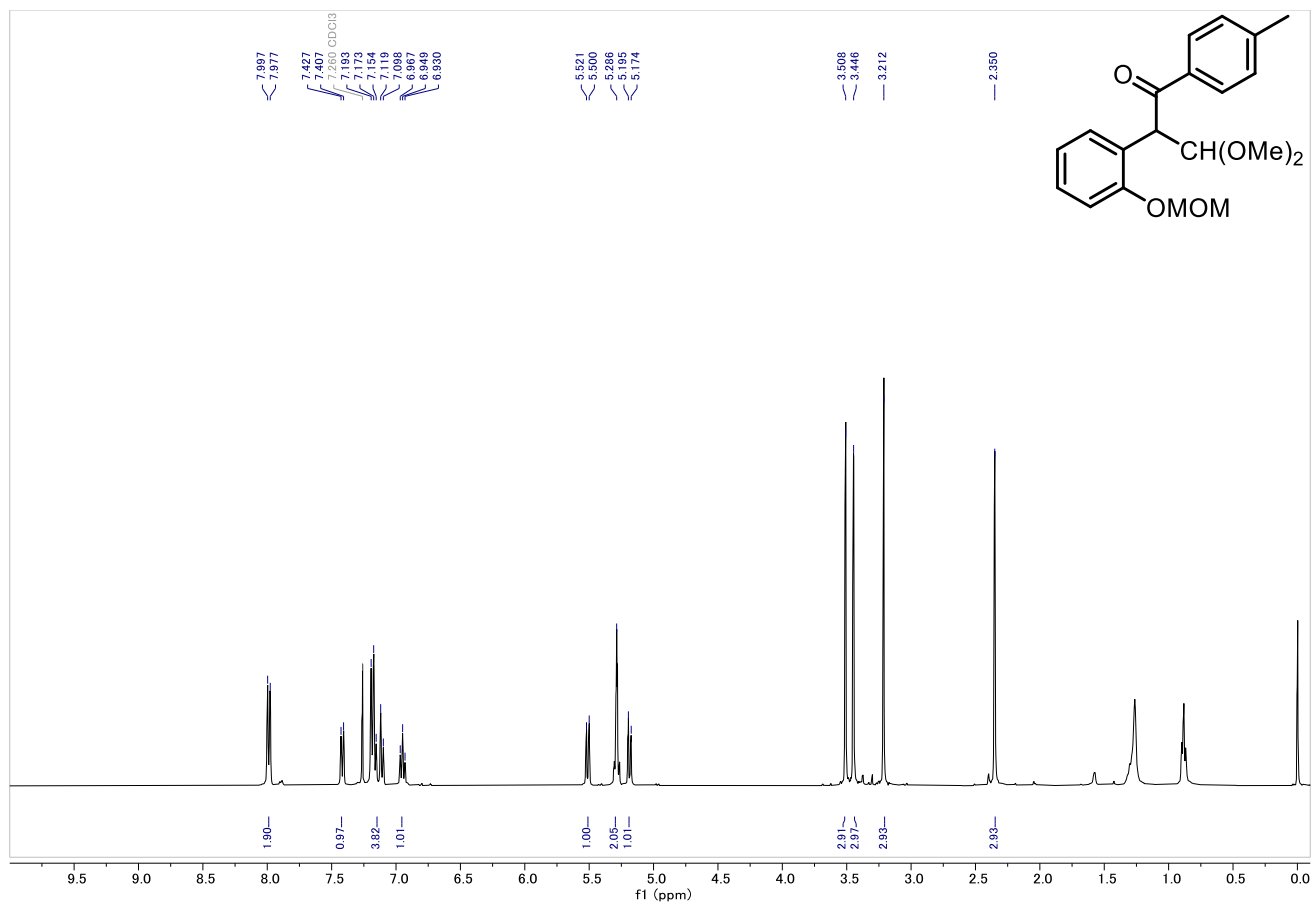

# <sup>13</sup>C NMR 2b

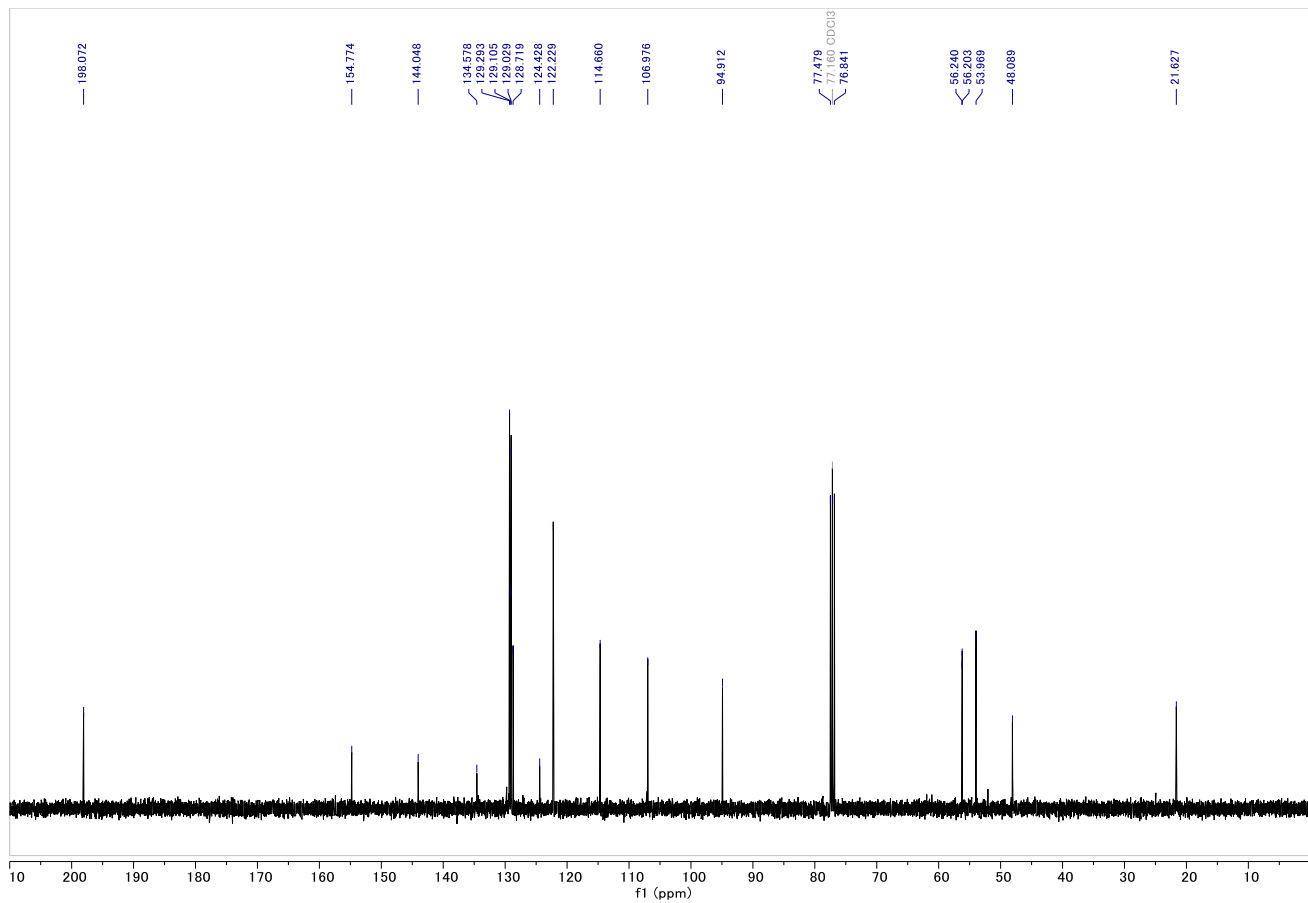

# <sup>1</sup>H NMR 2c

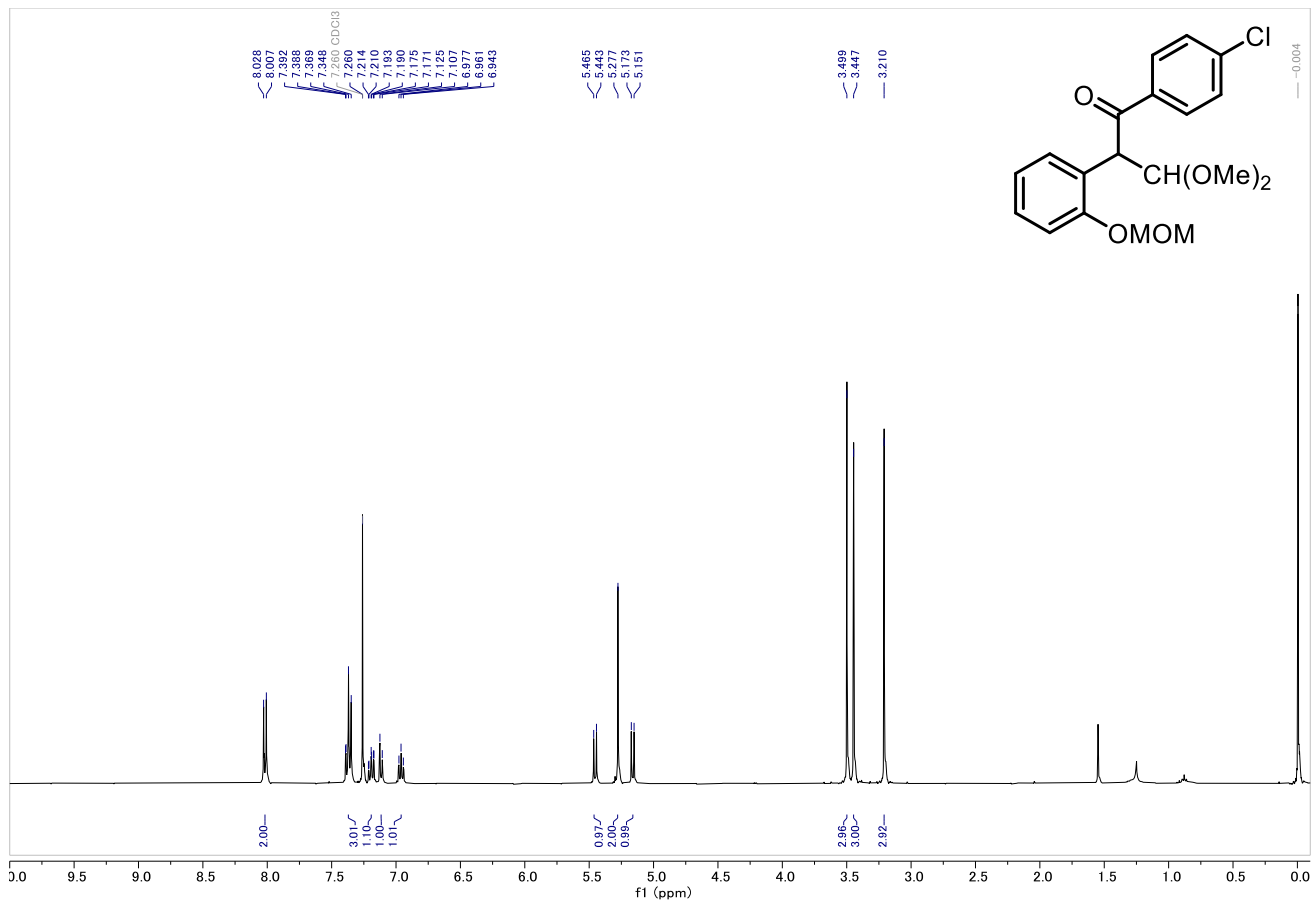

# <sup>13</sup>C NMR 2c

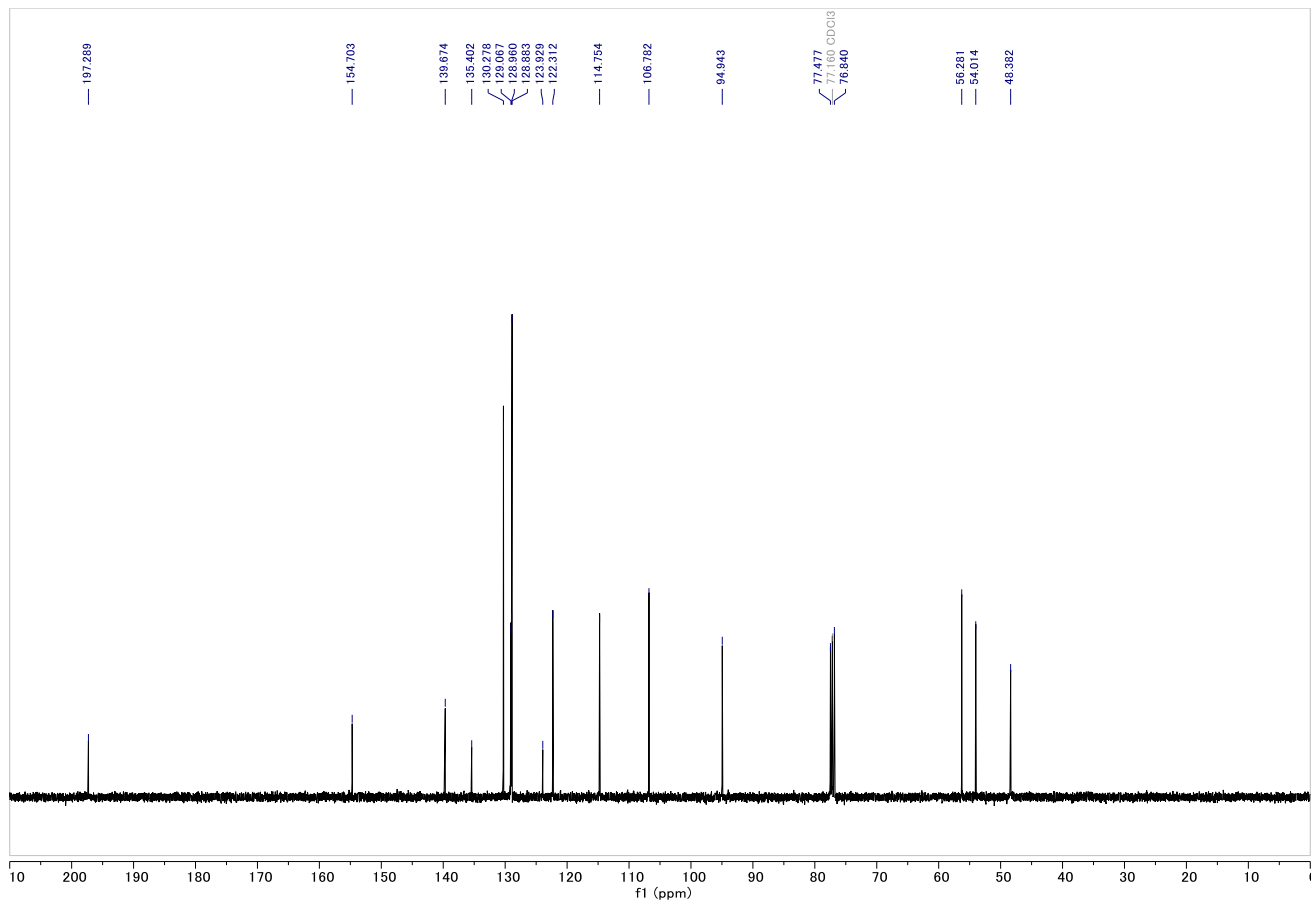

# <sup>1</sup>H NMR 2d

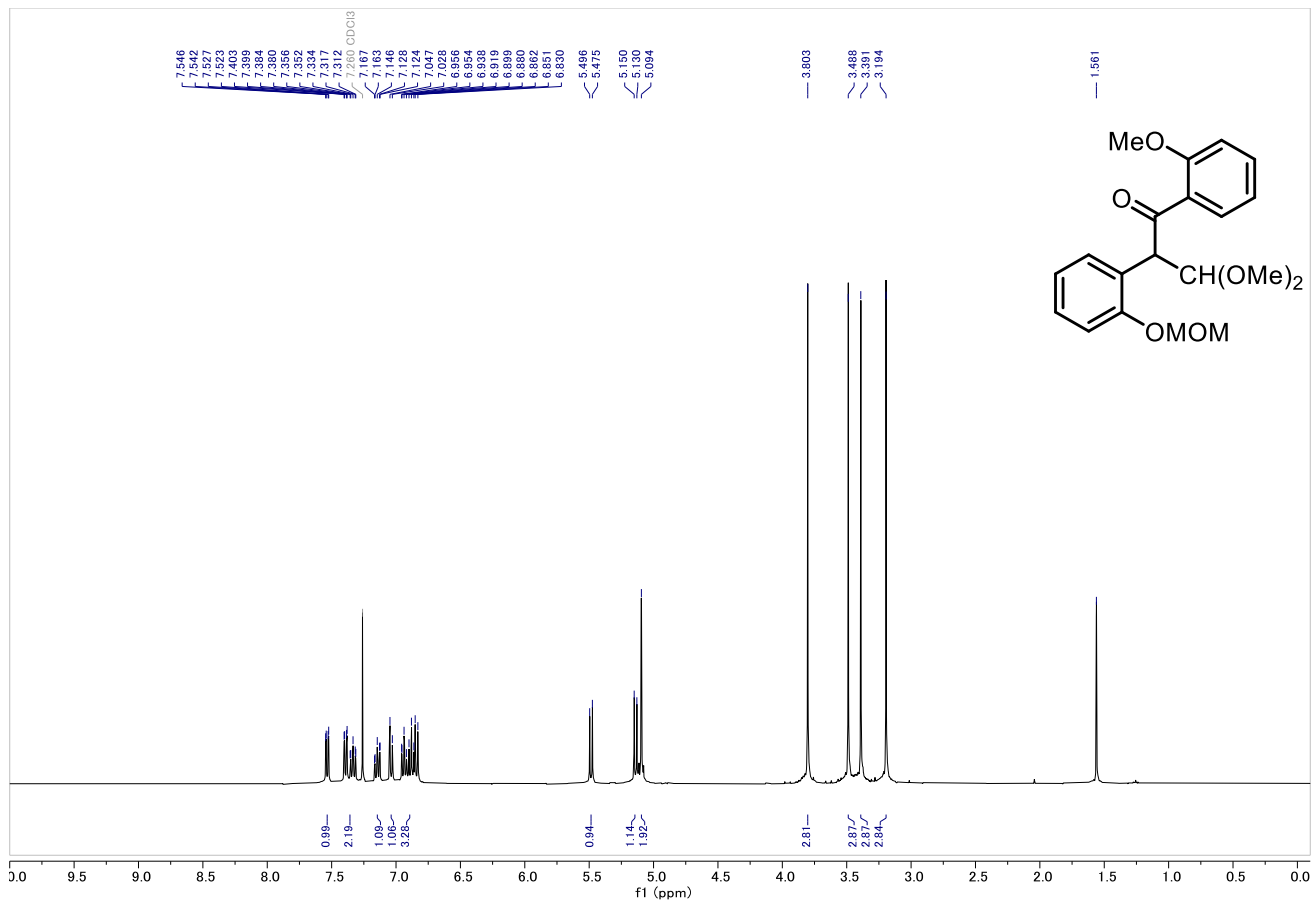

# <sup>13</sup>C NMR 2d

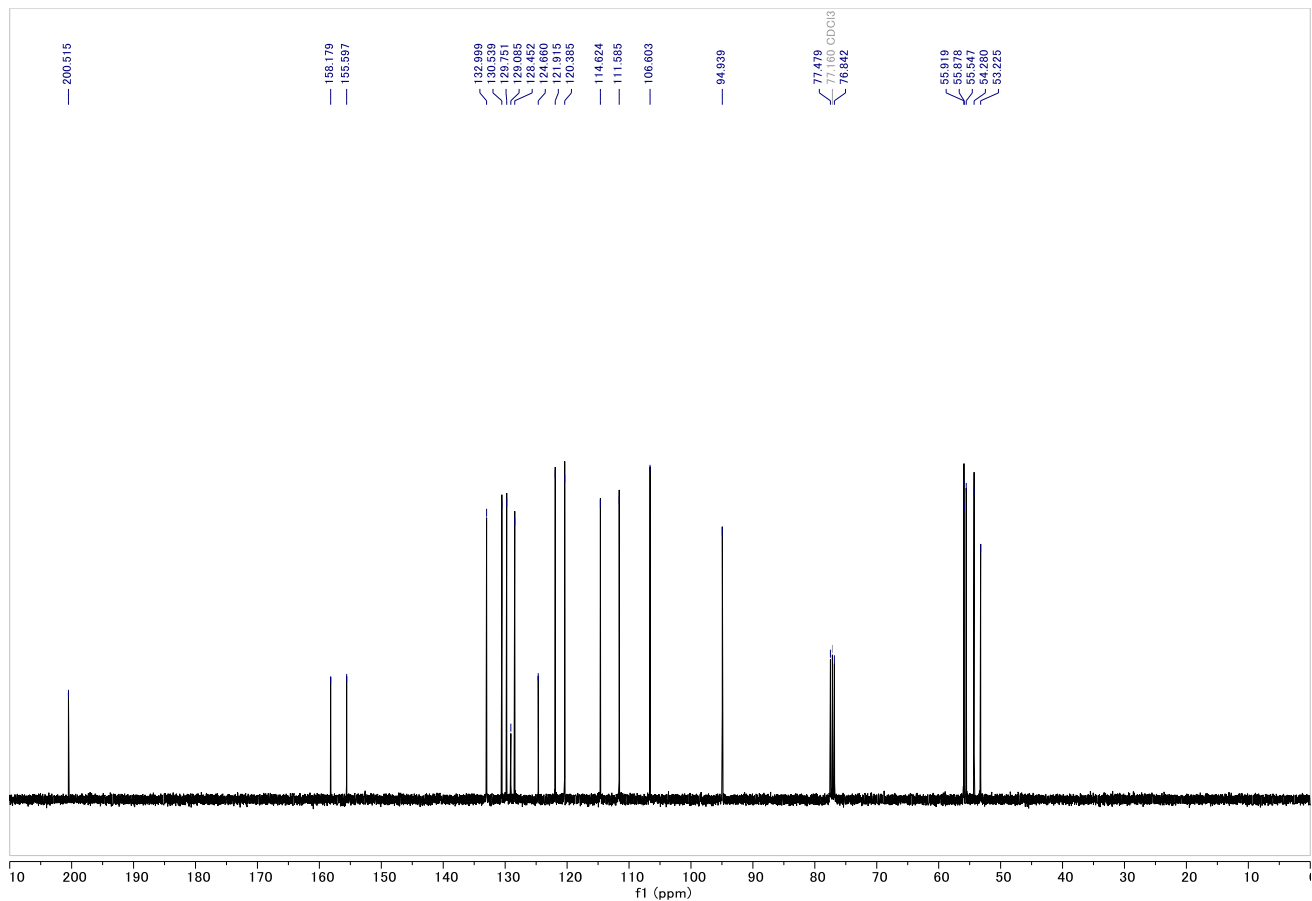



<sup>1</sup>H NMR 2e

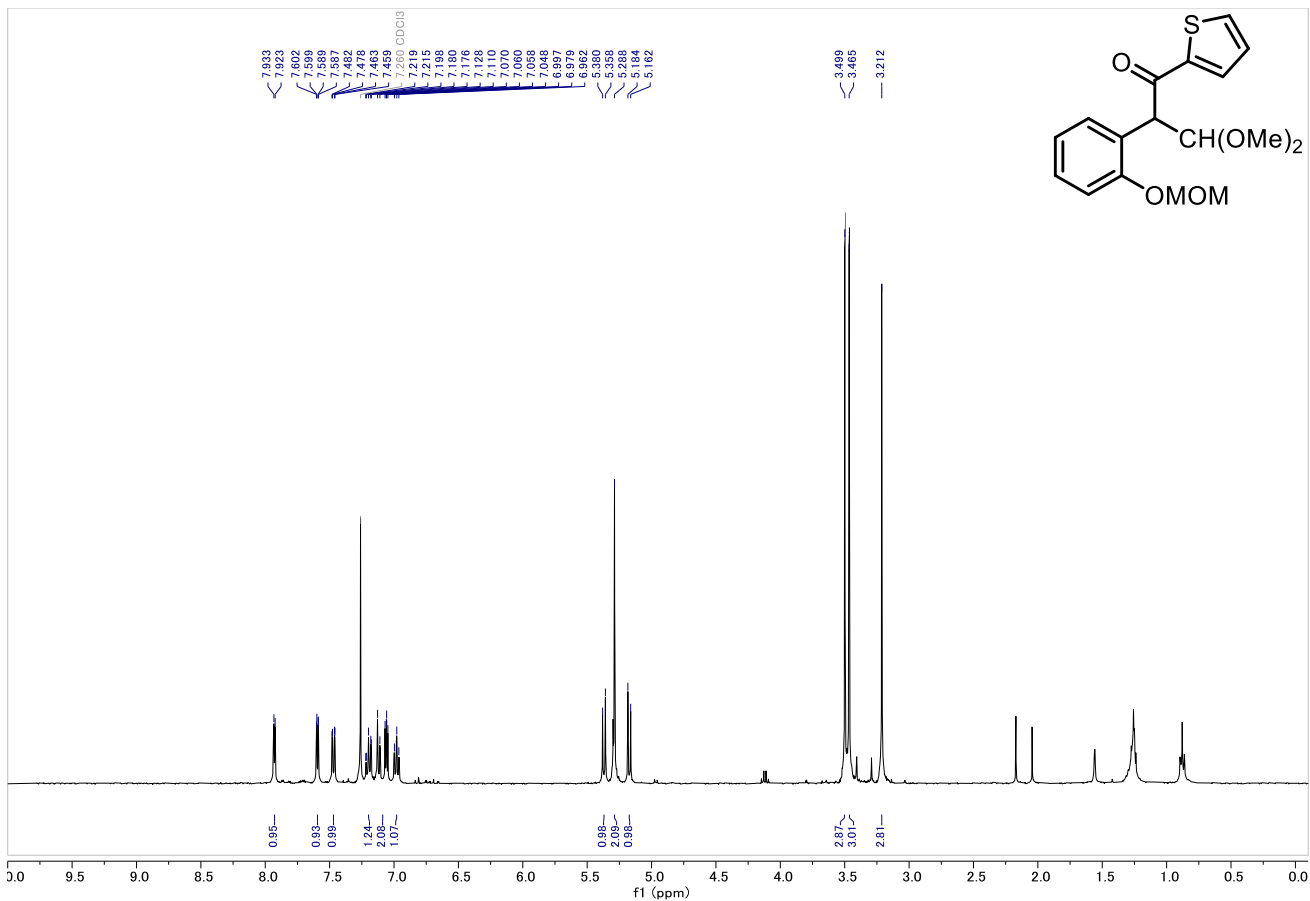

<sup>13</sup>C NMR 2e

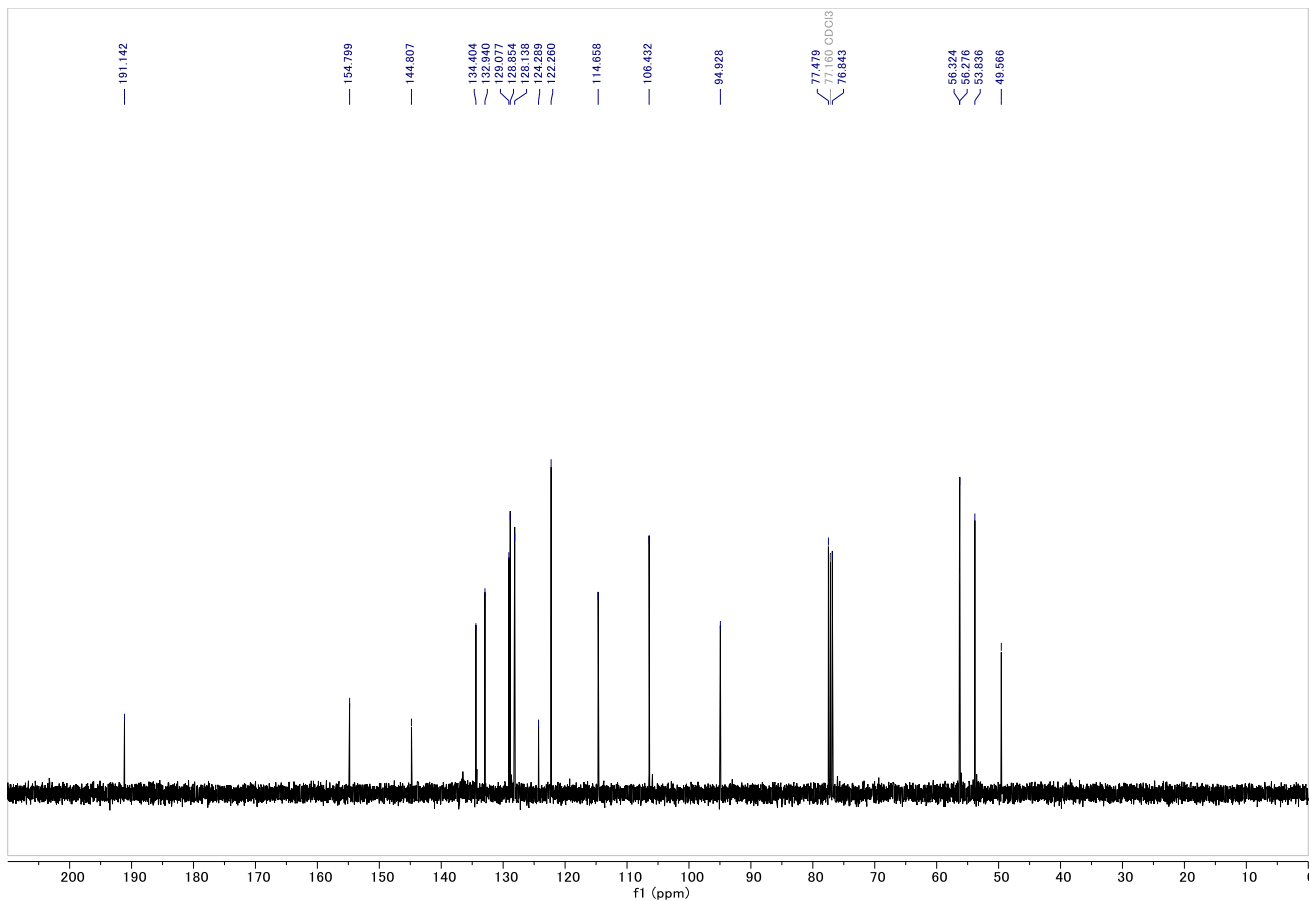

# <sup>1</sup>H NMR 2f

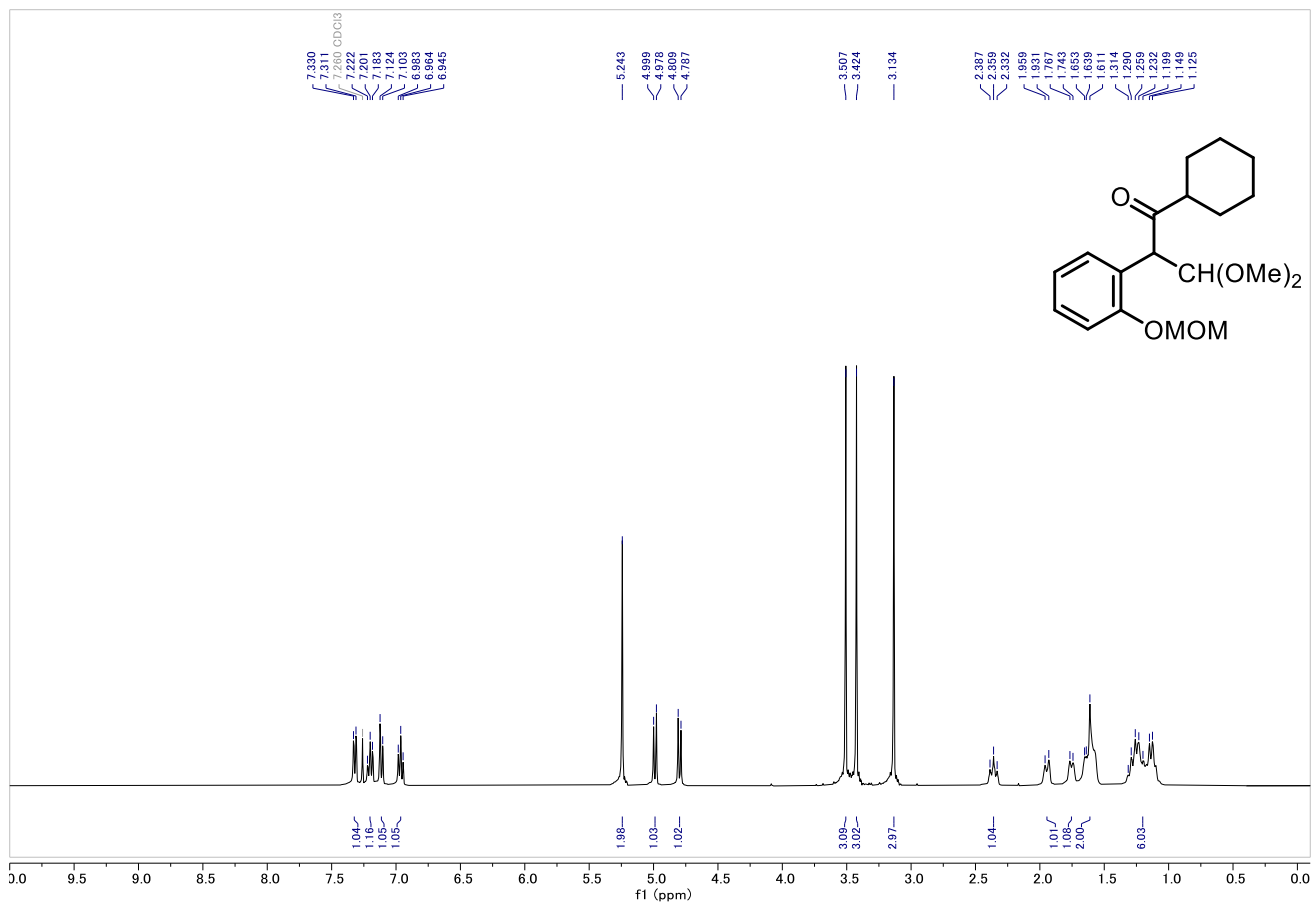

# <sup>13</sup>C NMR 2f

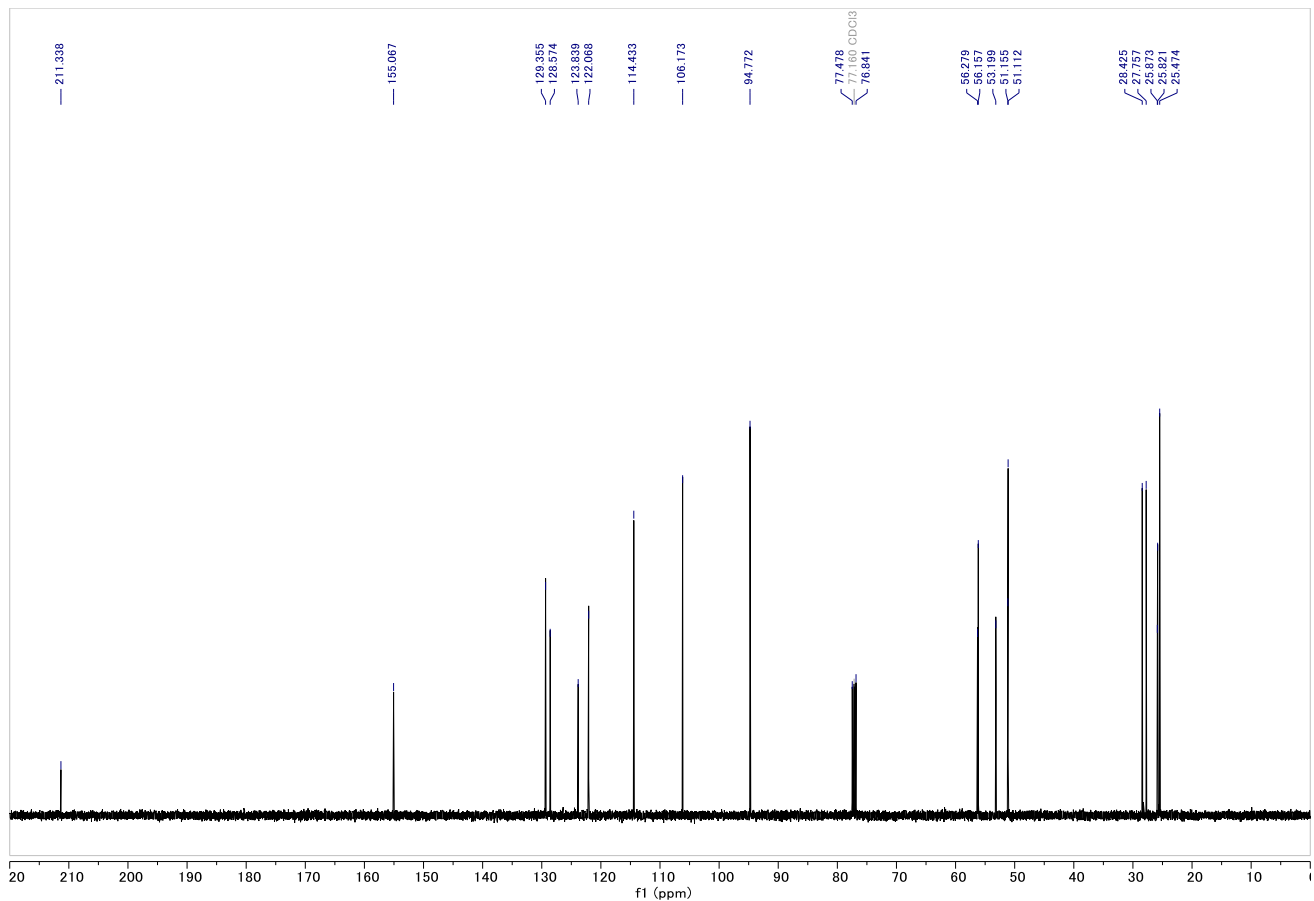

# <sup>1</sup>H NMR 2g

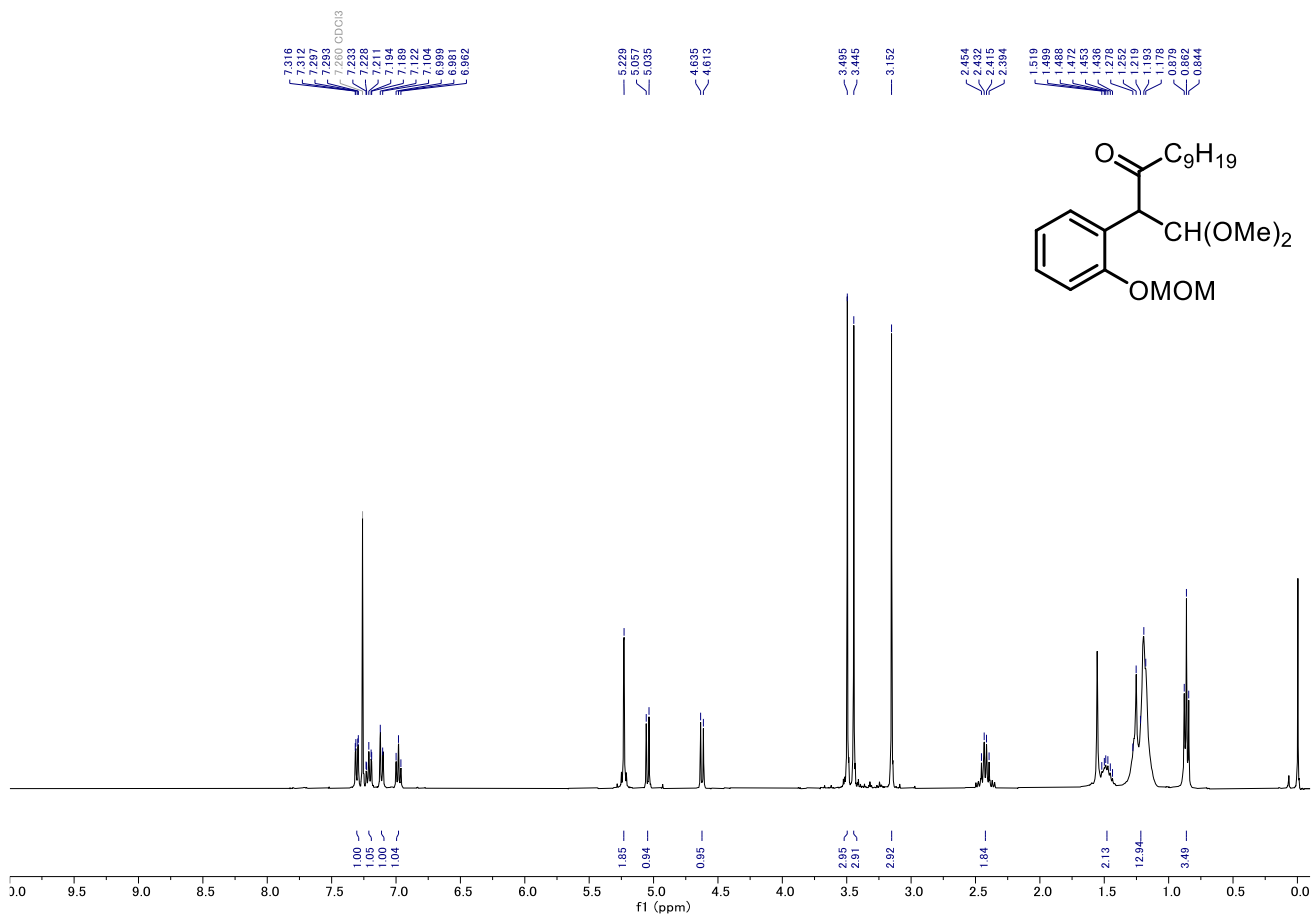

# <sup>13</sup>C NMR 2g

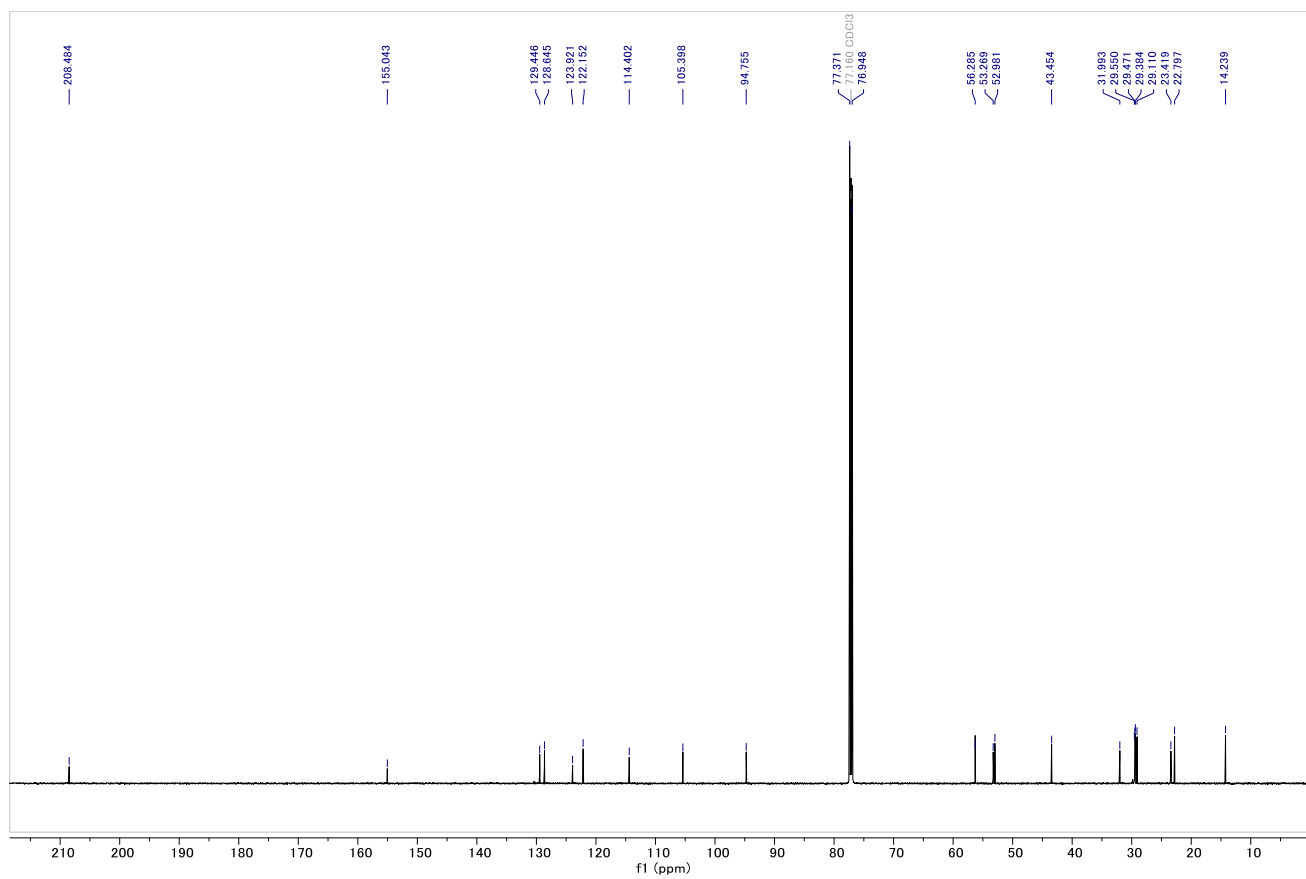

# <sup>1</sup>H NMR 3a

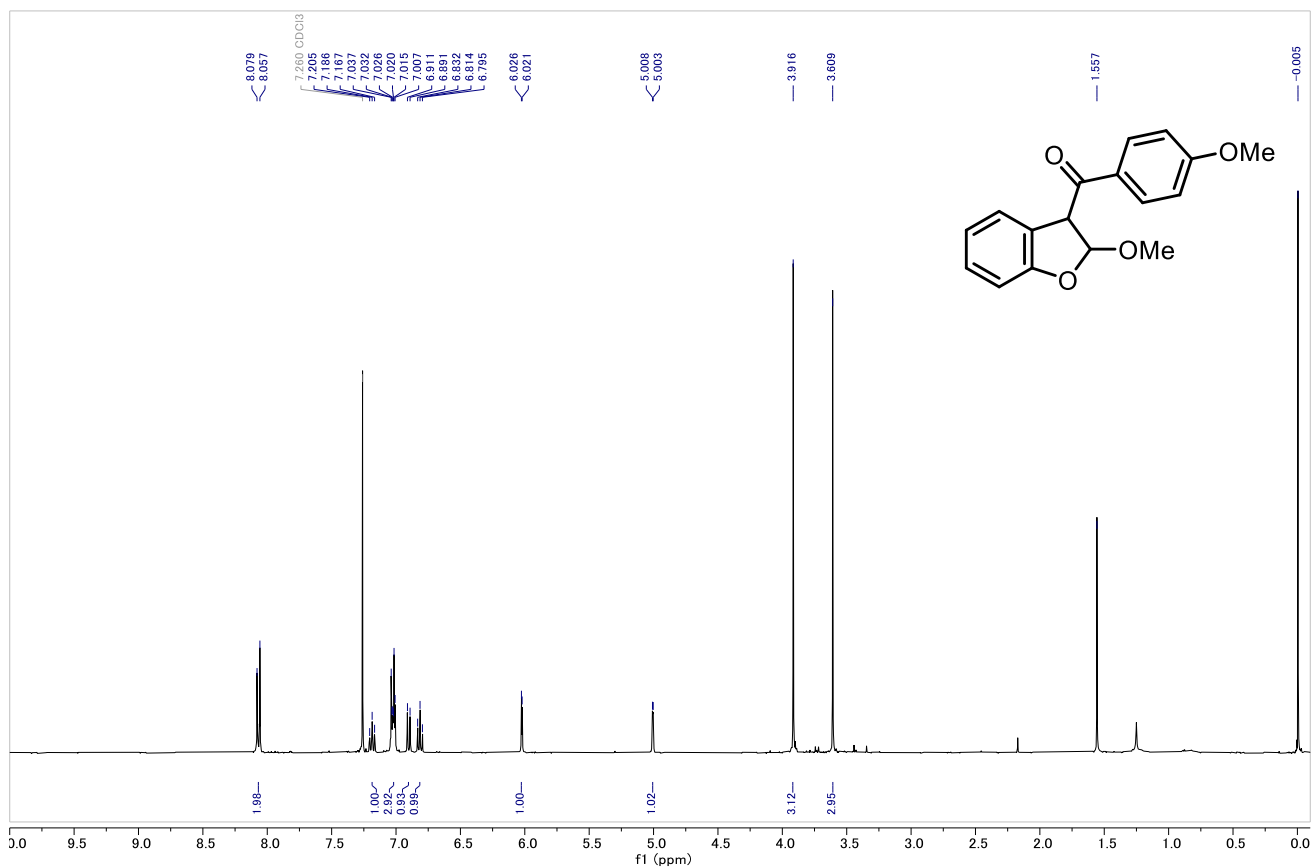

# <sup>13</sup>C NMR 3a

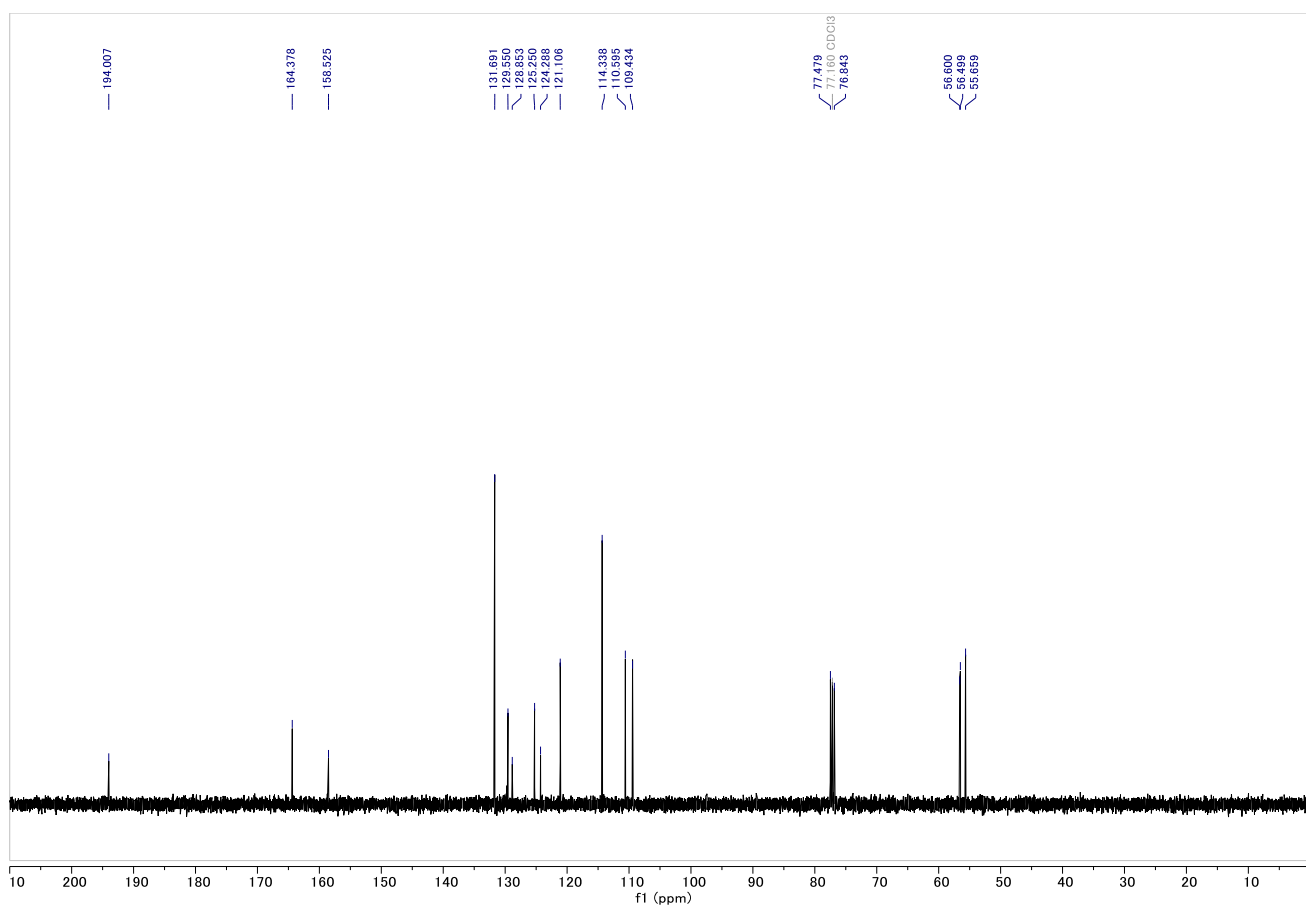

# <sup>1</sup>H NMR 3b

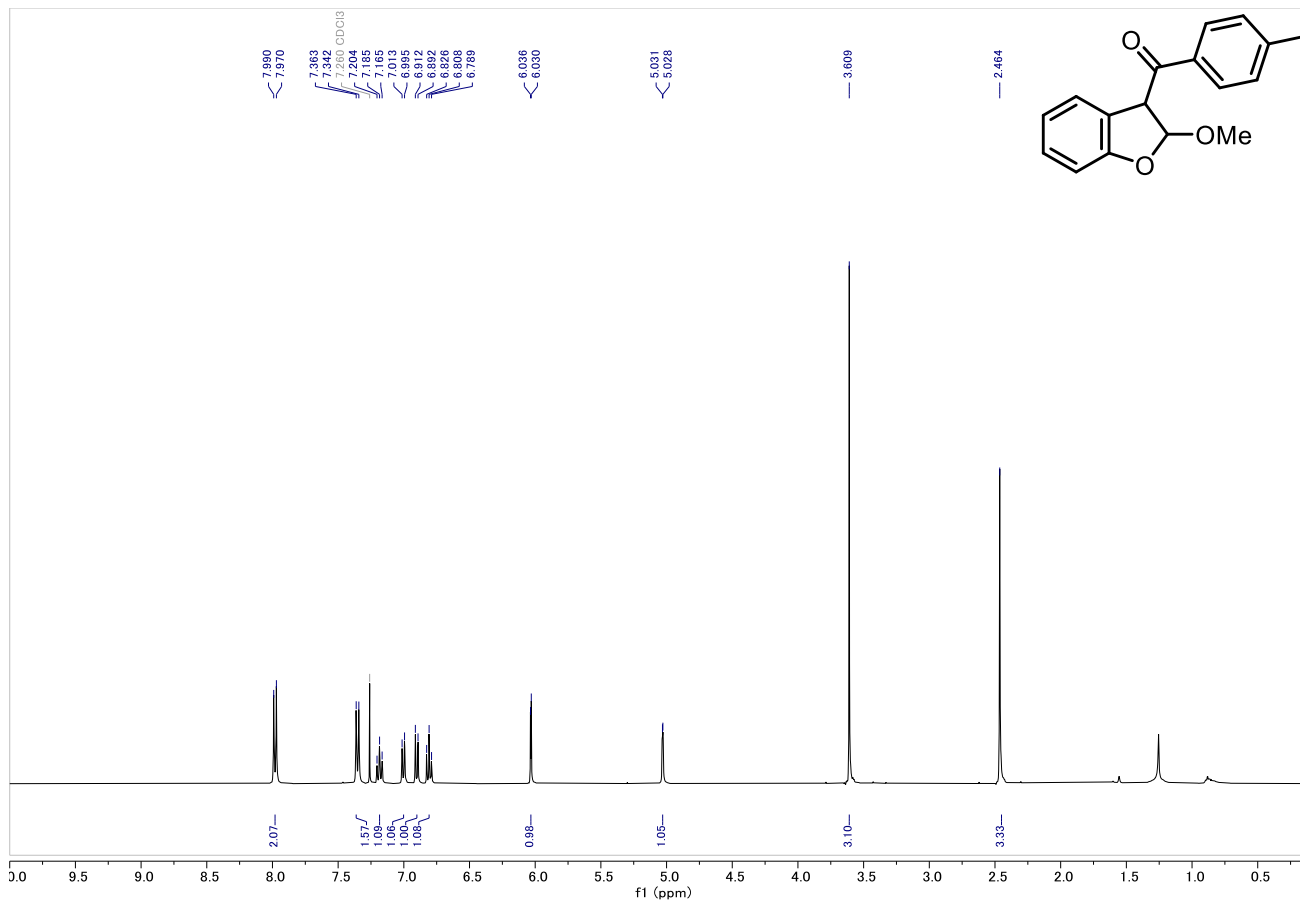

# <sup>13</sup>C NMR 3b

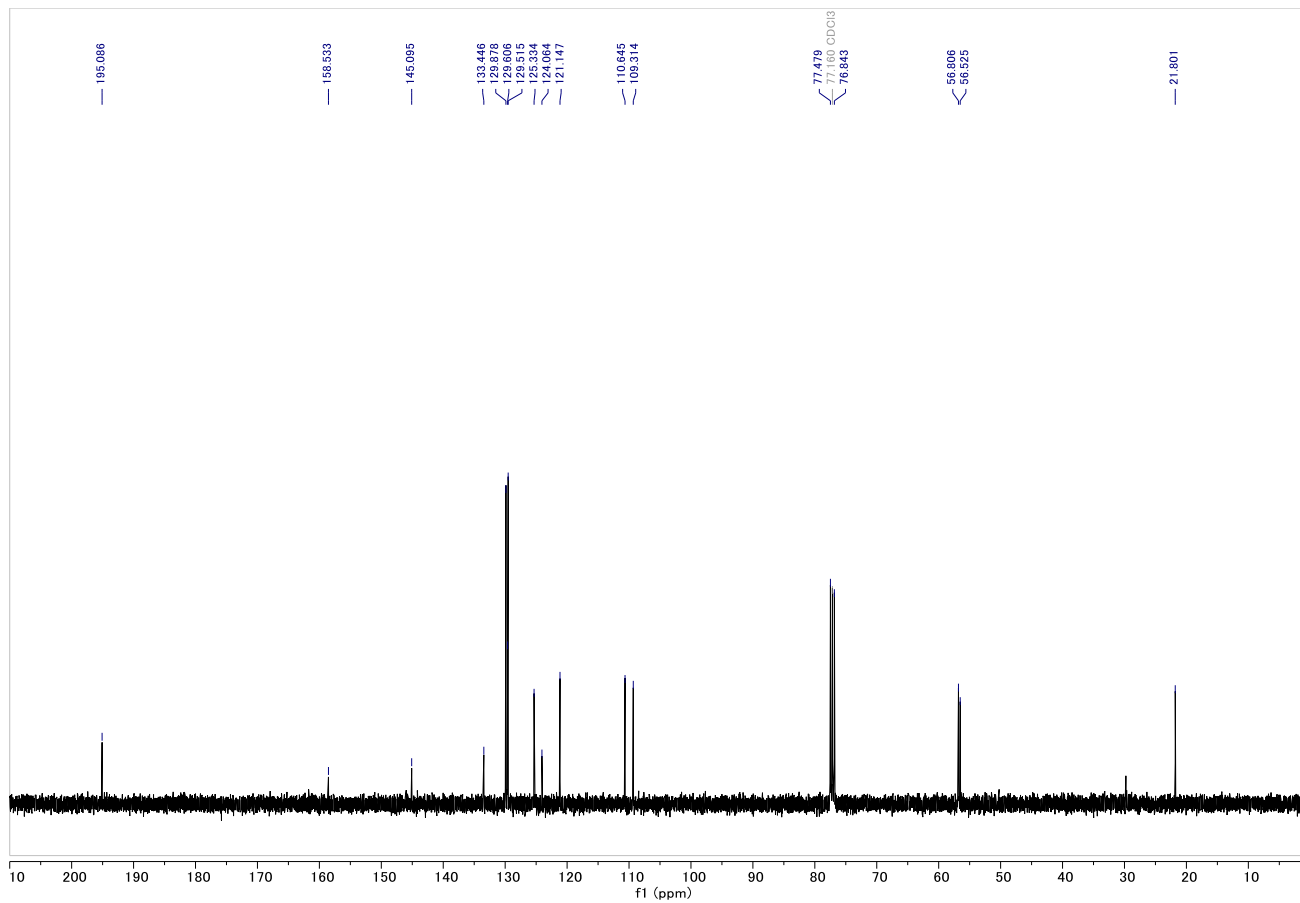

### <sup>1</sup>H NMR 3c

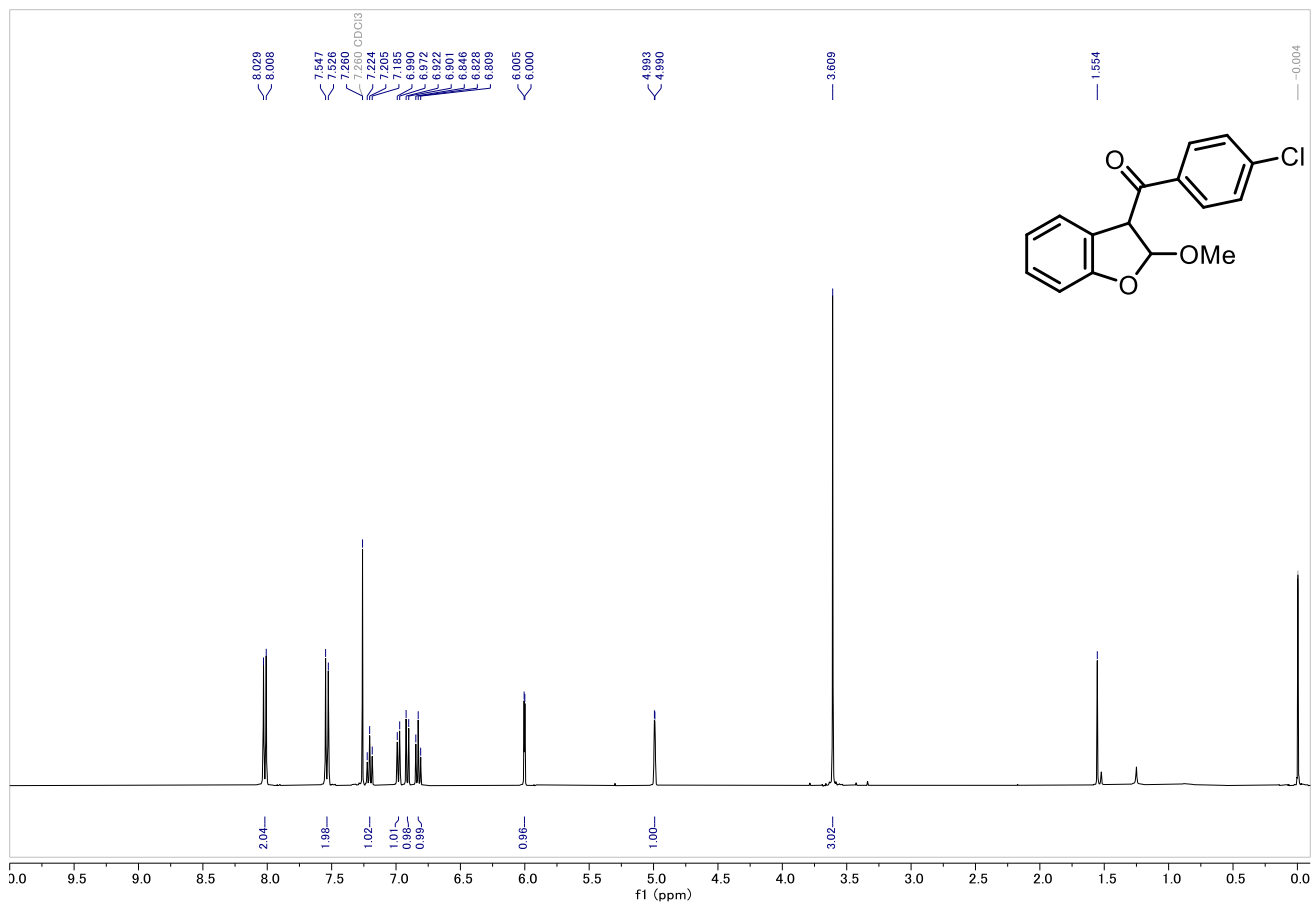

### <sup>13</sup>C NMR 3c

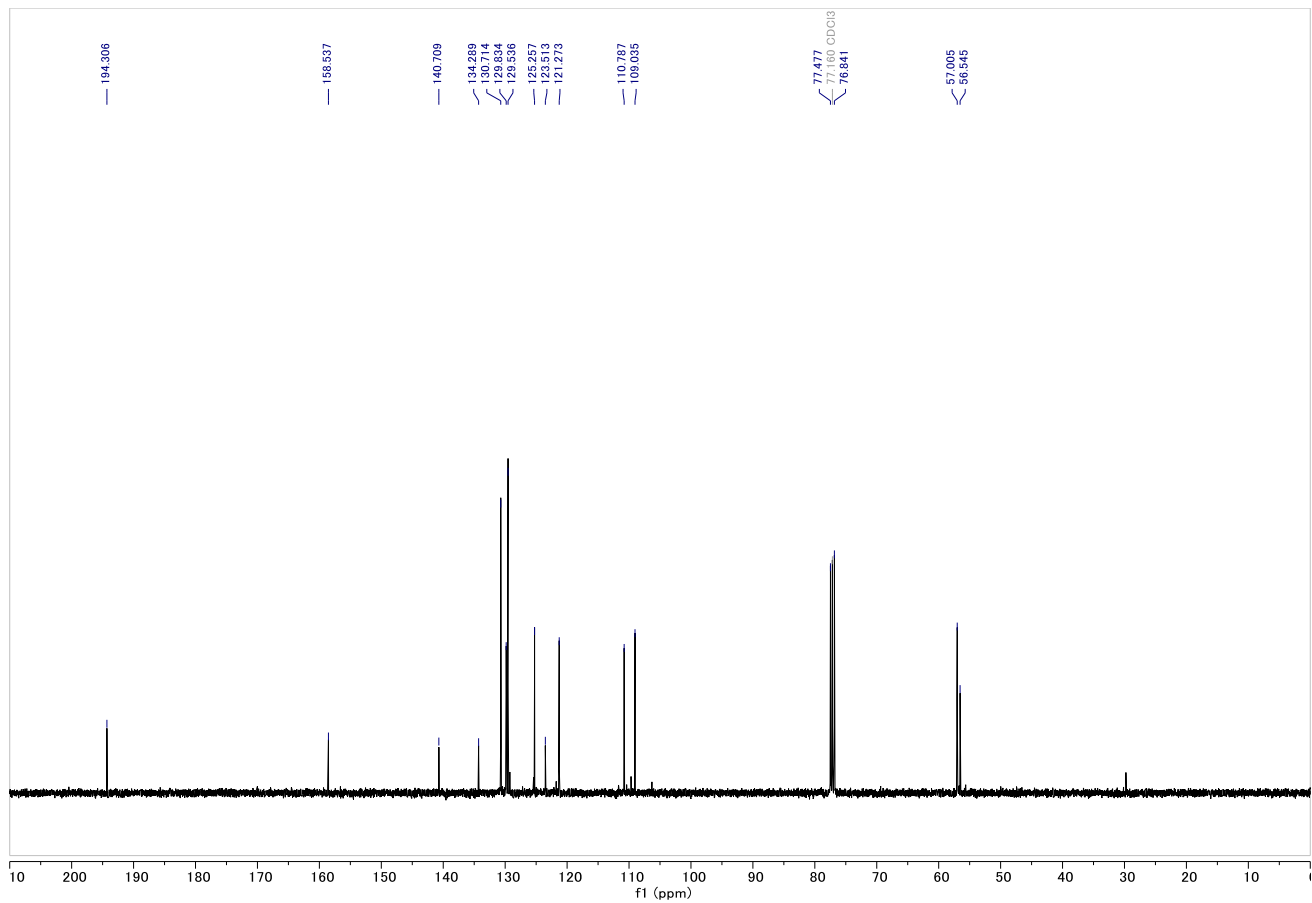

# <sup>1</sup>H NMR 3d

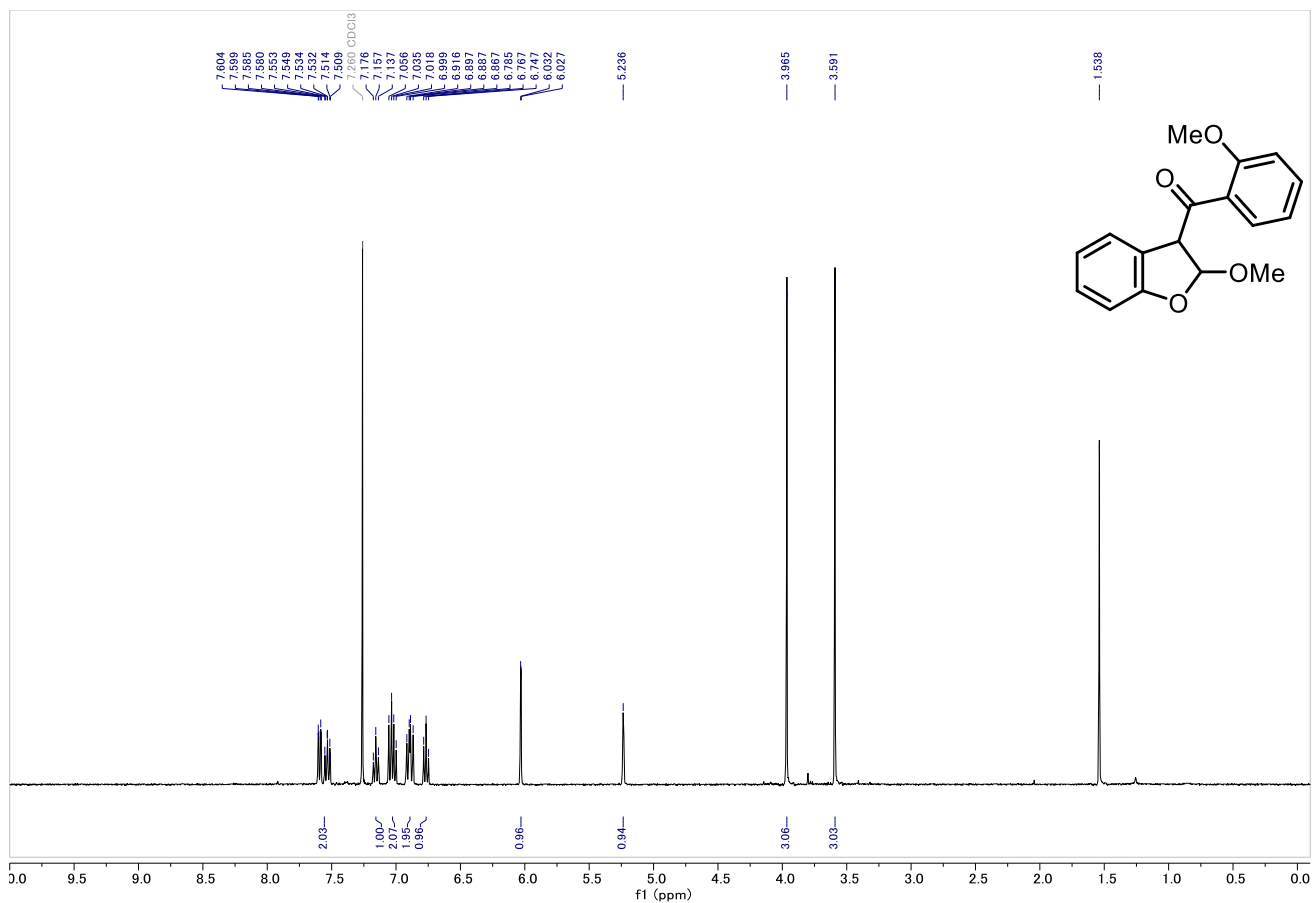

# <sup>13</sup>C NMR 3d

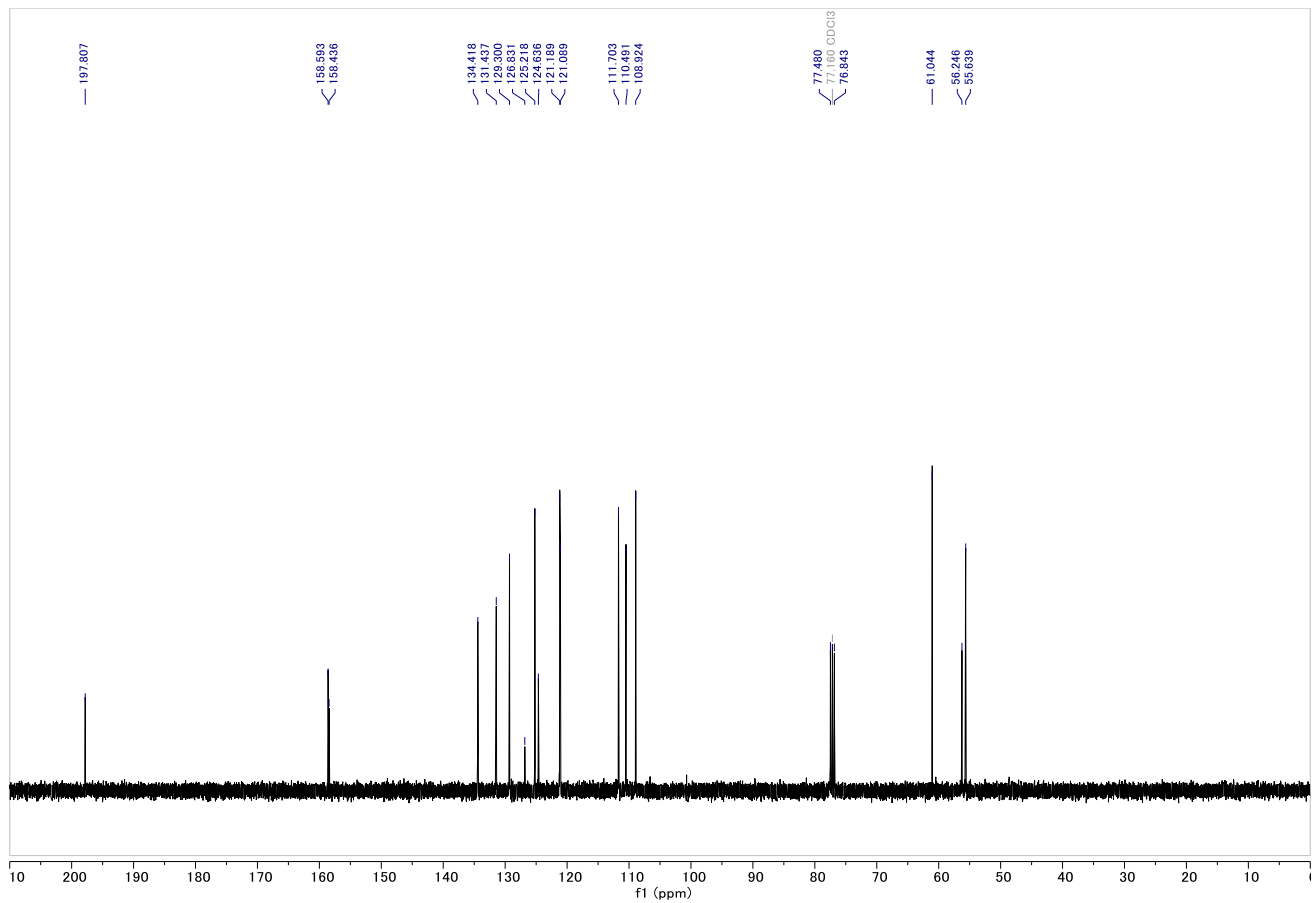

# <sup>1</sup>H NMR 3e

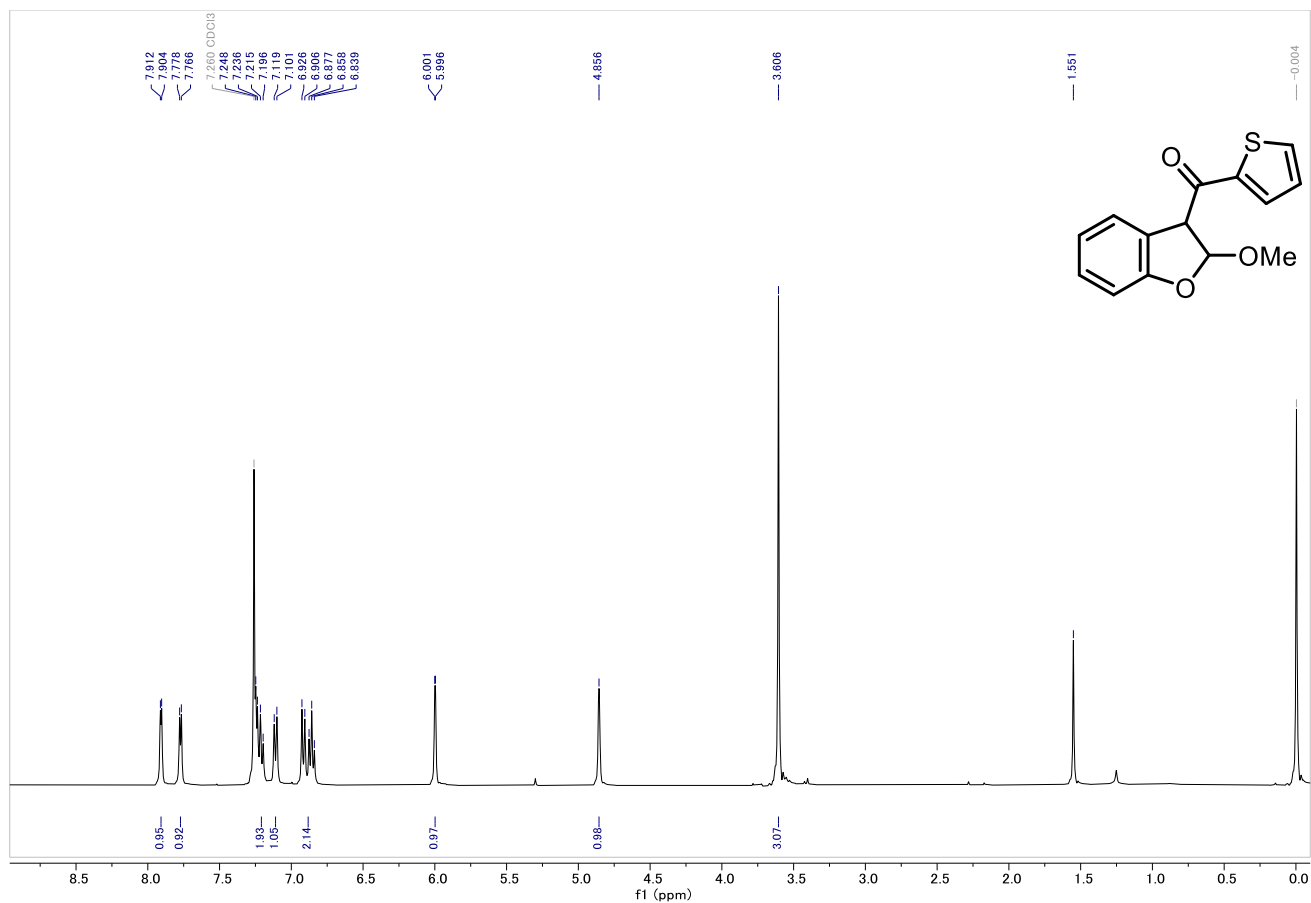

# <sup>13</sup>C NMR 3e

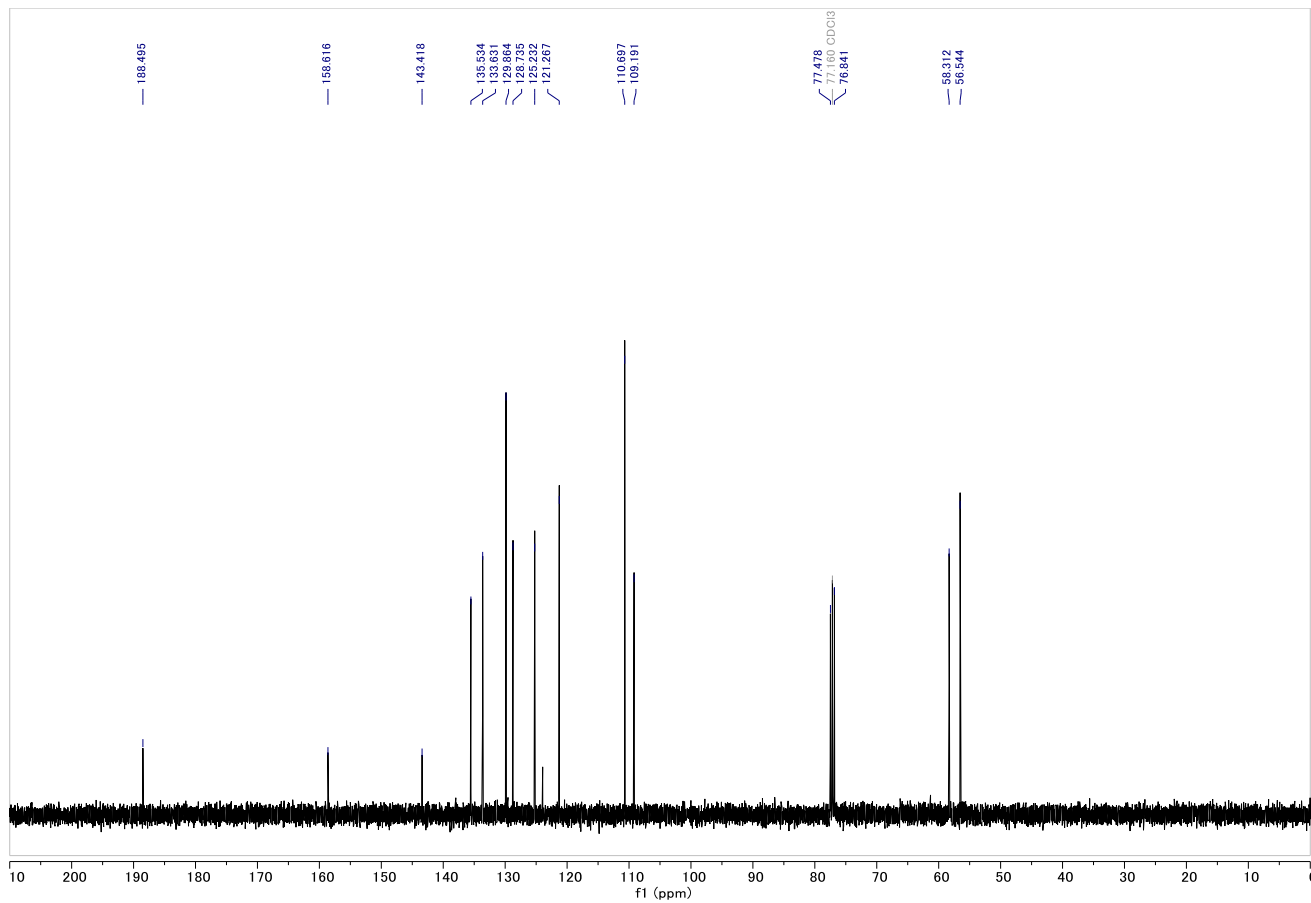



# <sup>1</sup>H NMR 3f

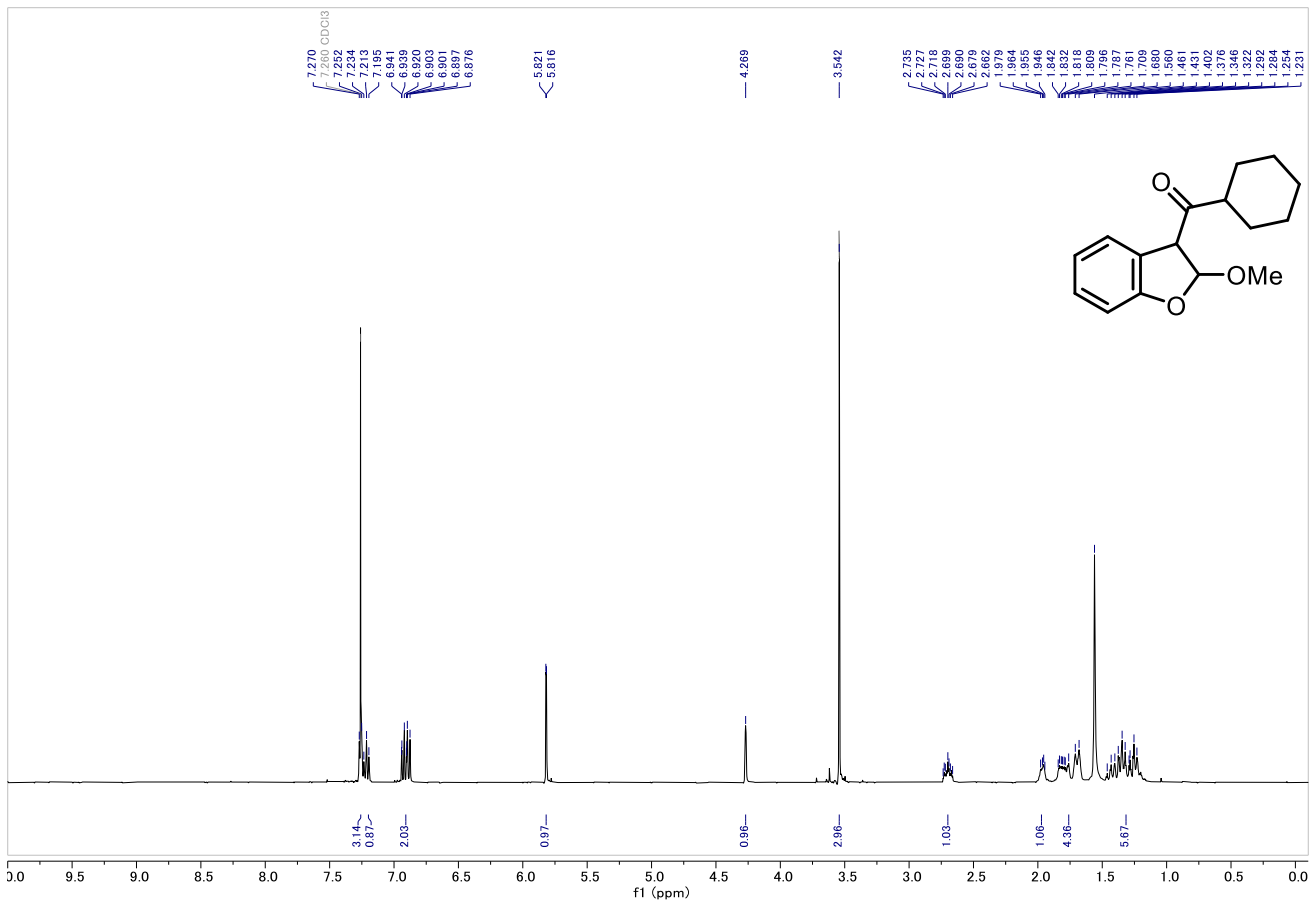

# <sup>13</sup>C NMR 3f

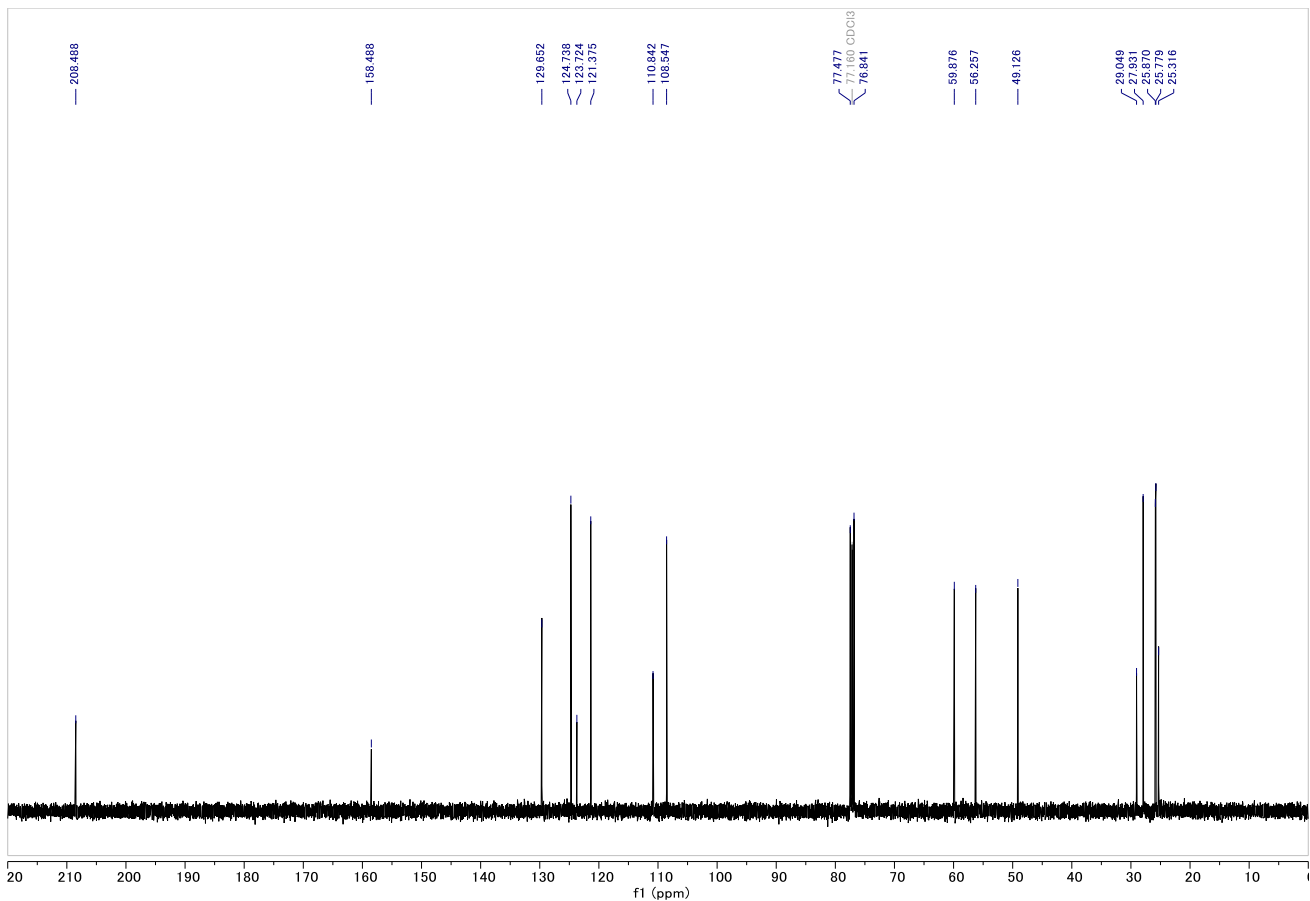

# <sup>1</sup>H NMR 3g

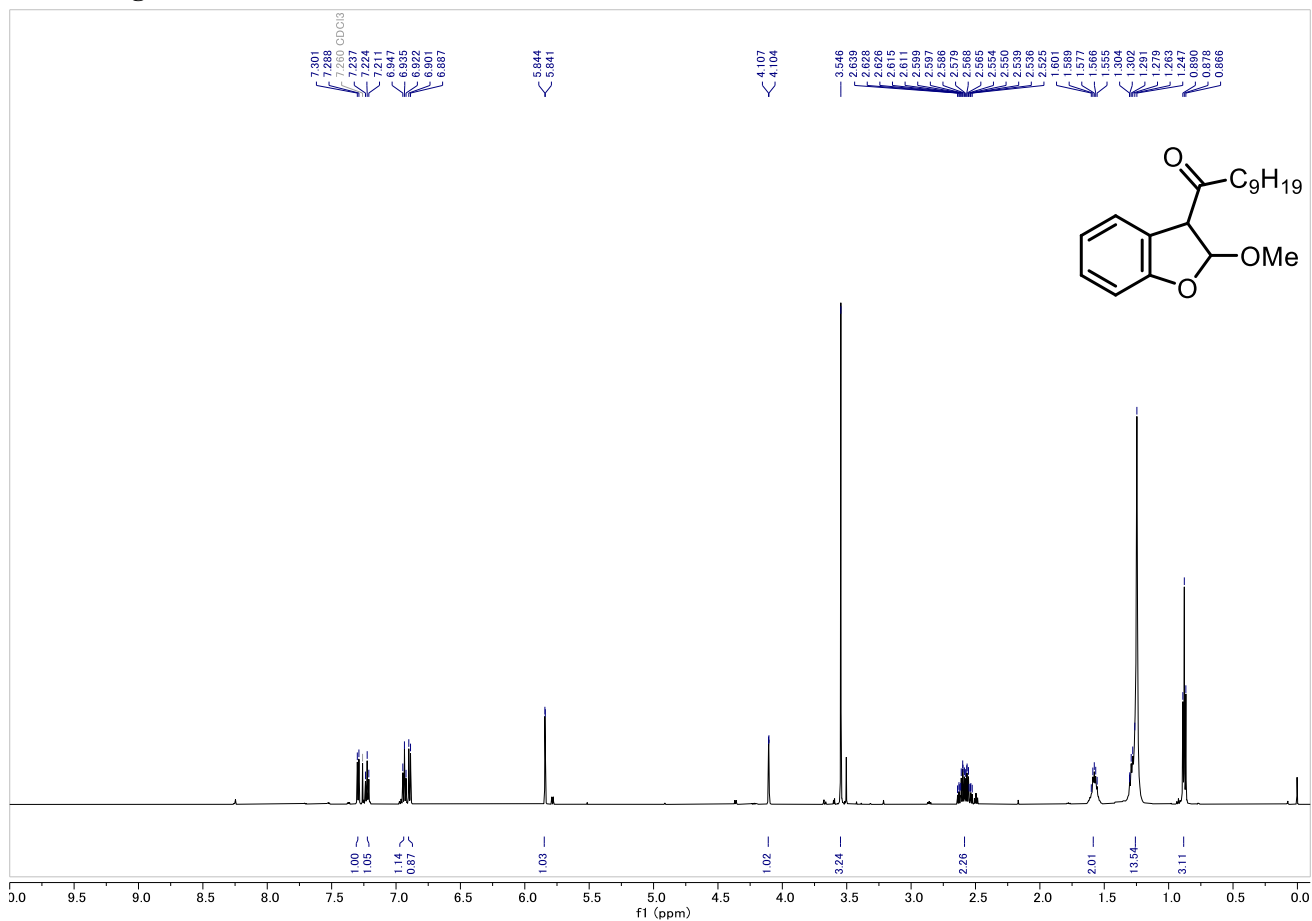

# <sup>13</sup>C NMR 3g

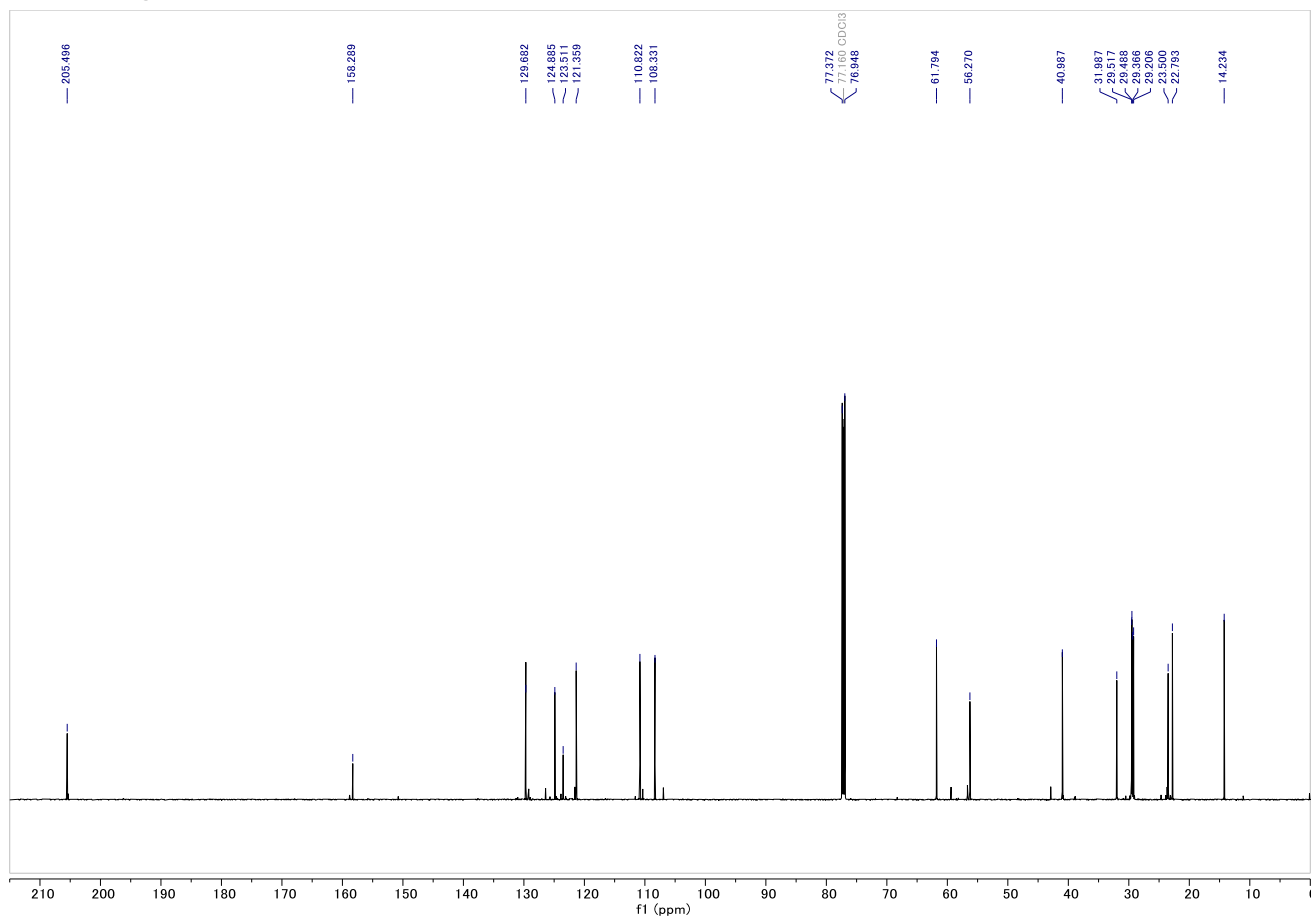

# <sup>1</sup>H NMR 4a

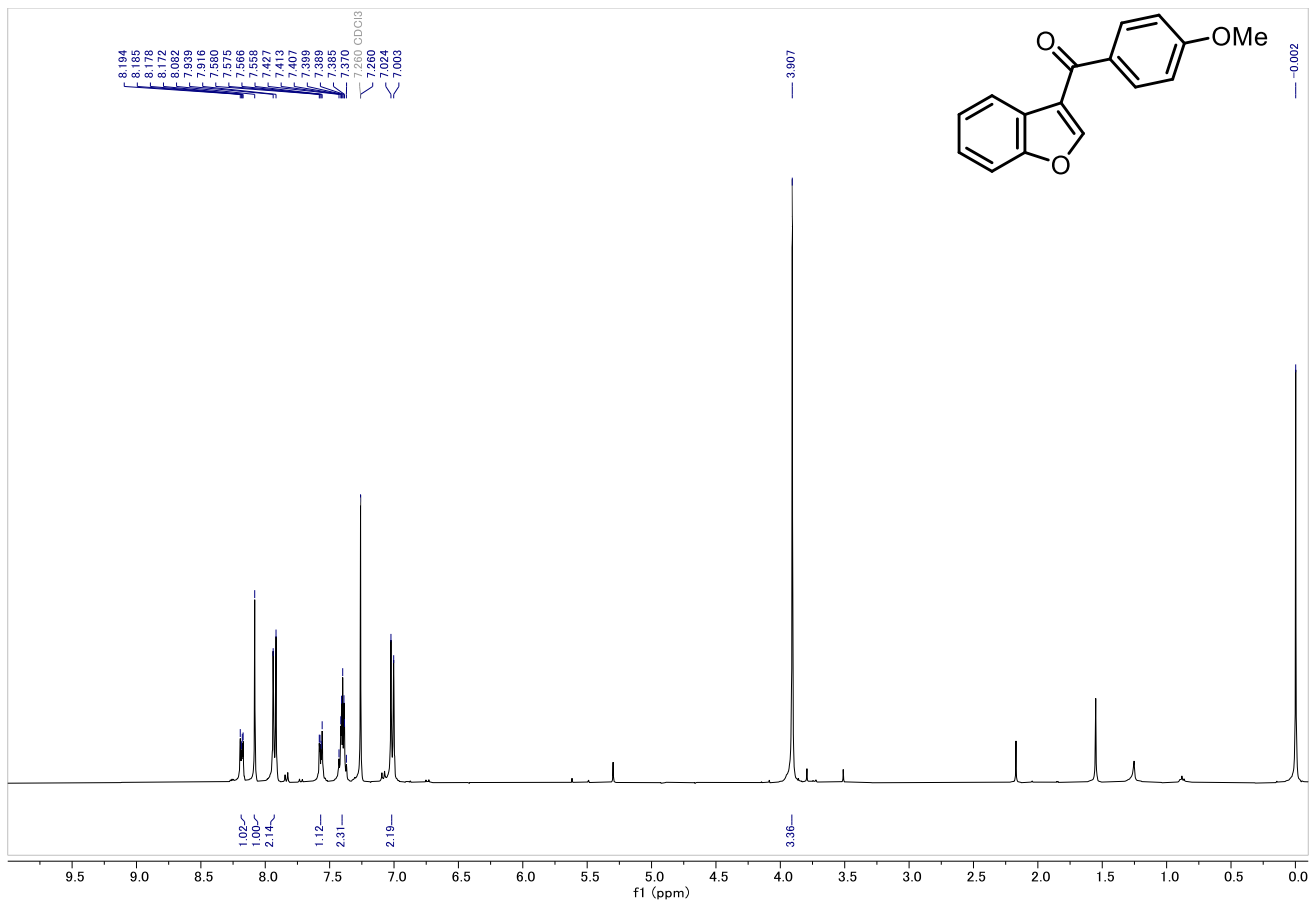

# <sup>13</sup>C NMR 4a

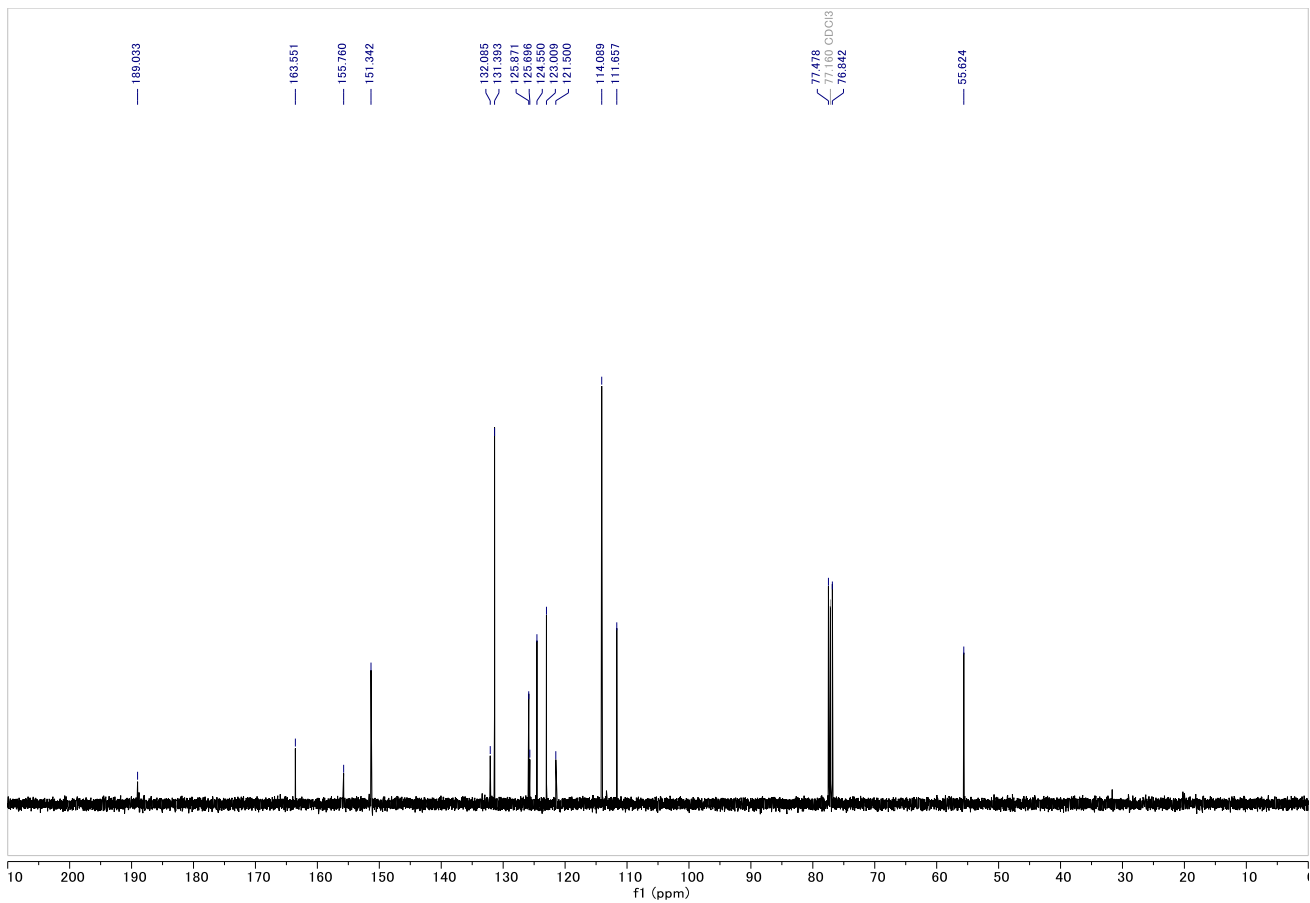

# <sup>1</sup>H NMR 4b

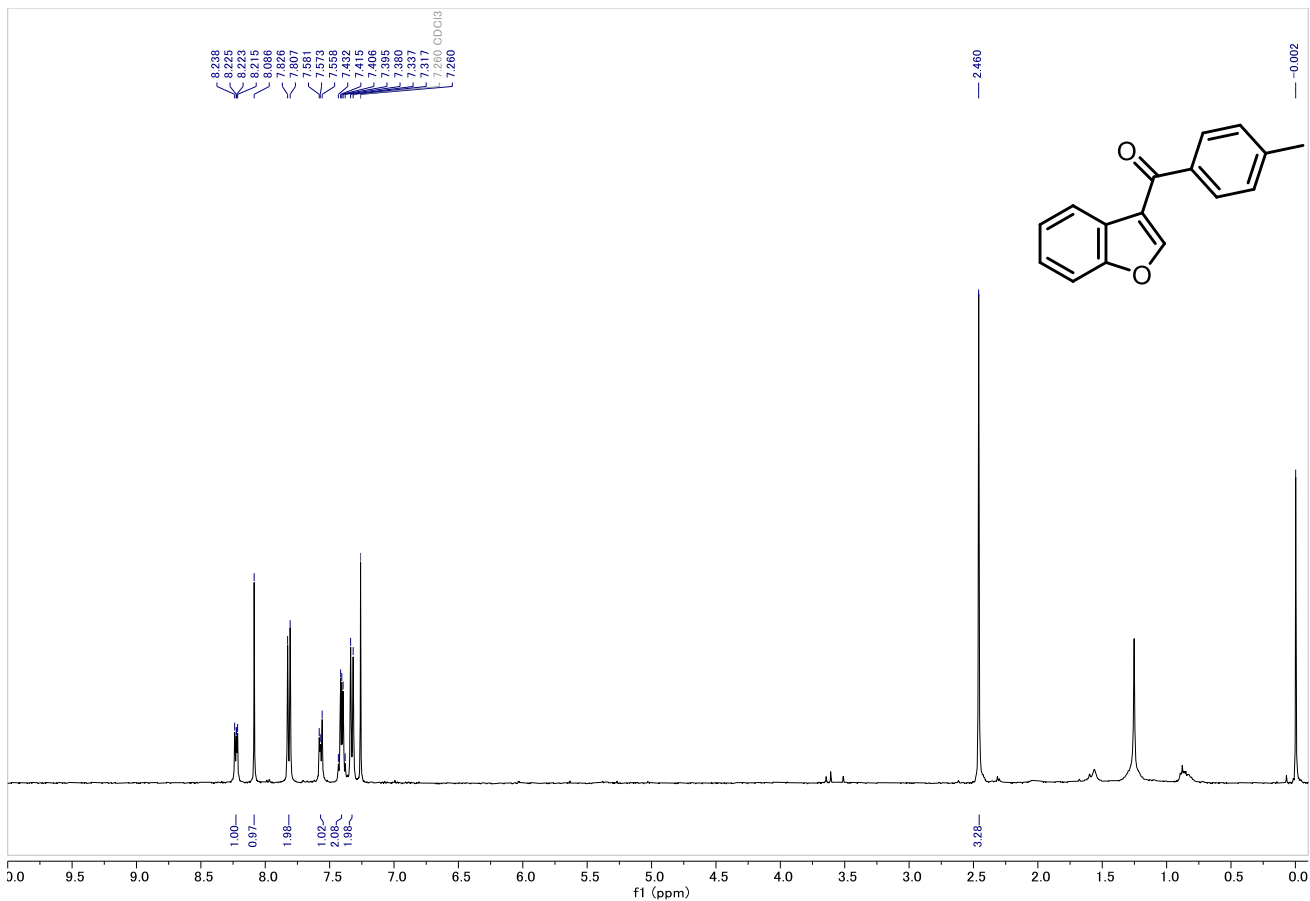

# <sup>13</sup>C NMR 4b

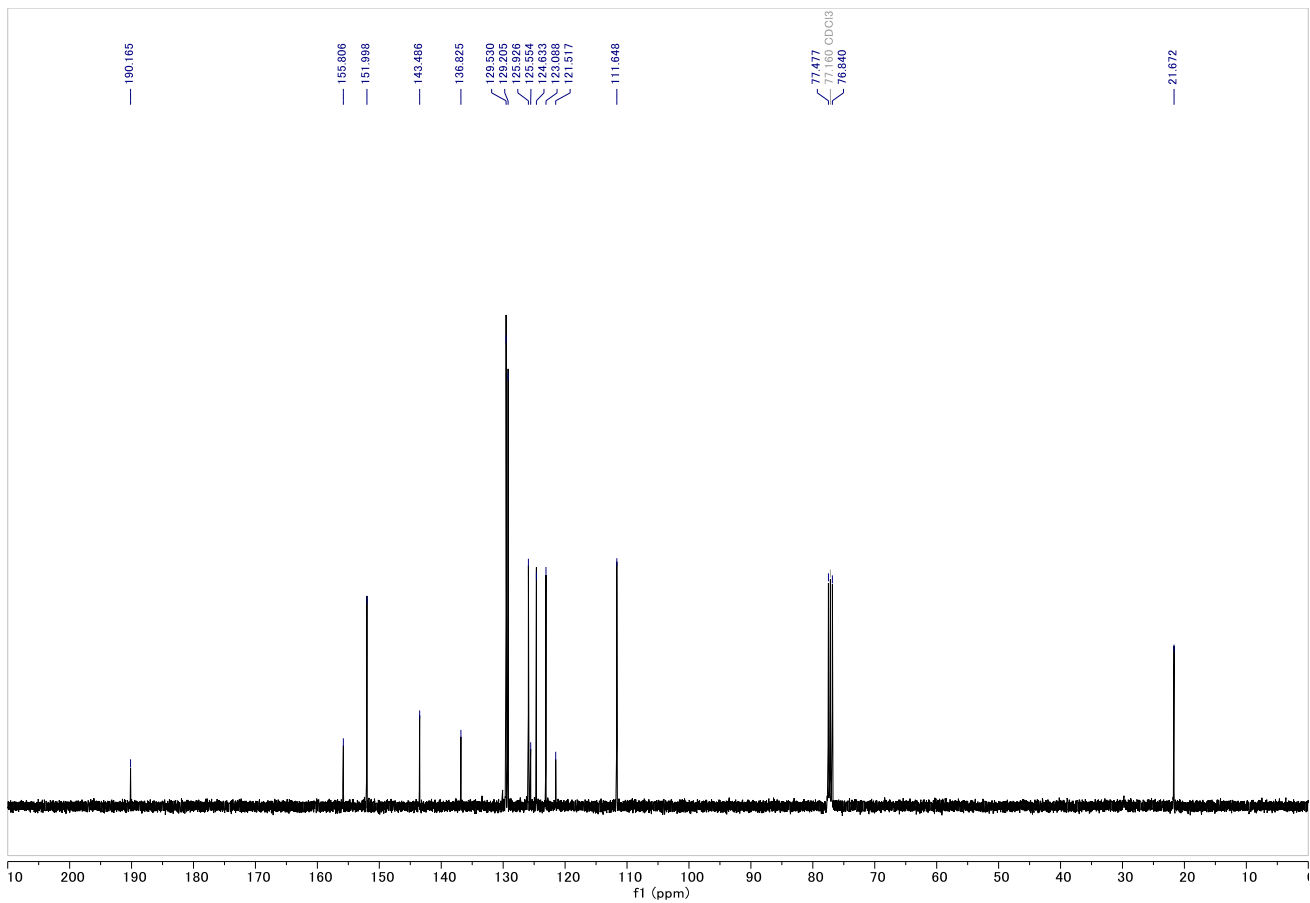

# <sup>1</sup>H NMR 4c

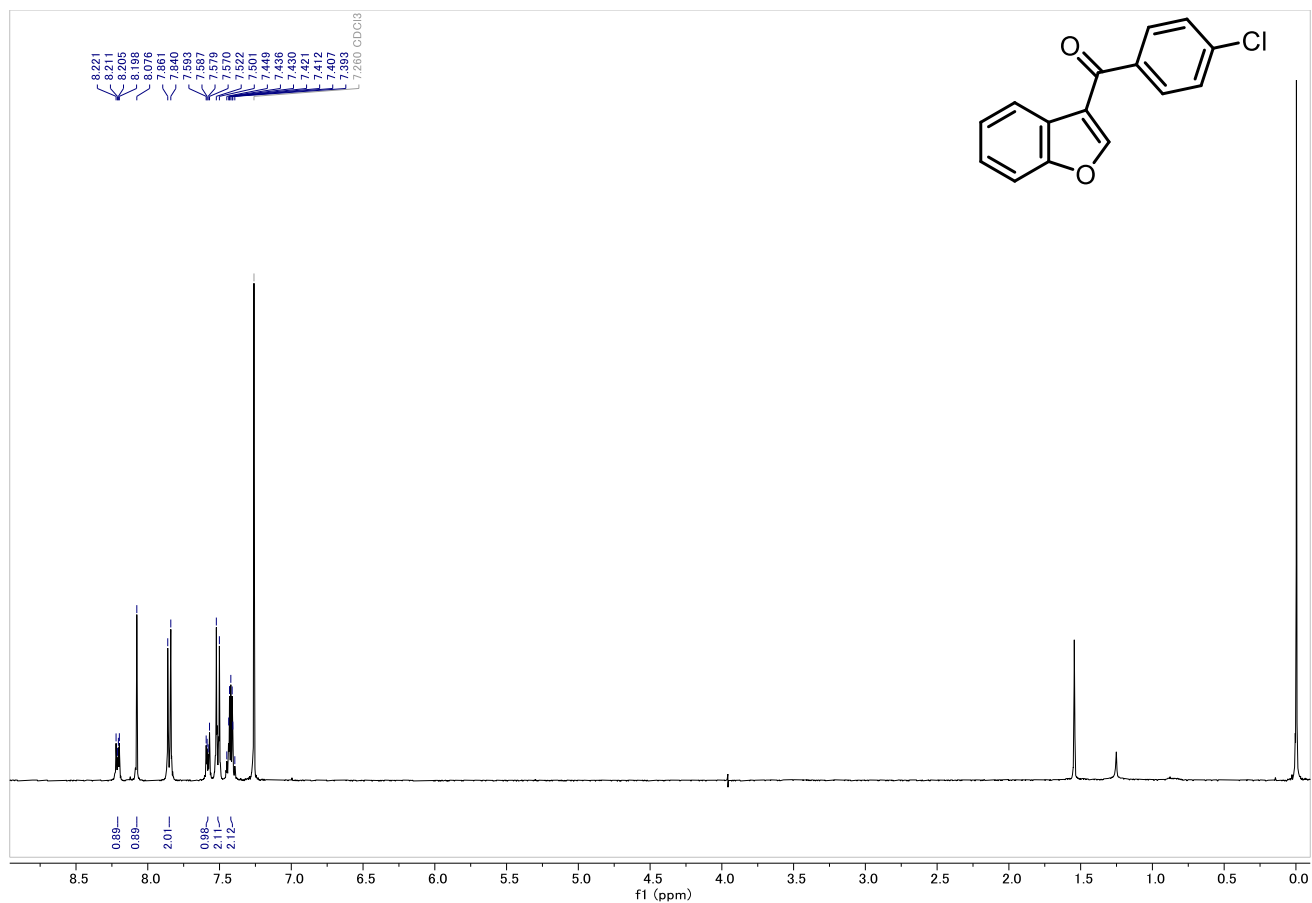

# <sup>13</sup>C NMR 4c

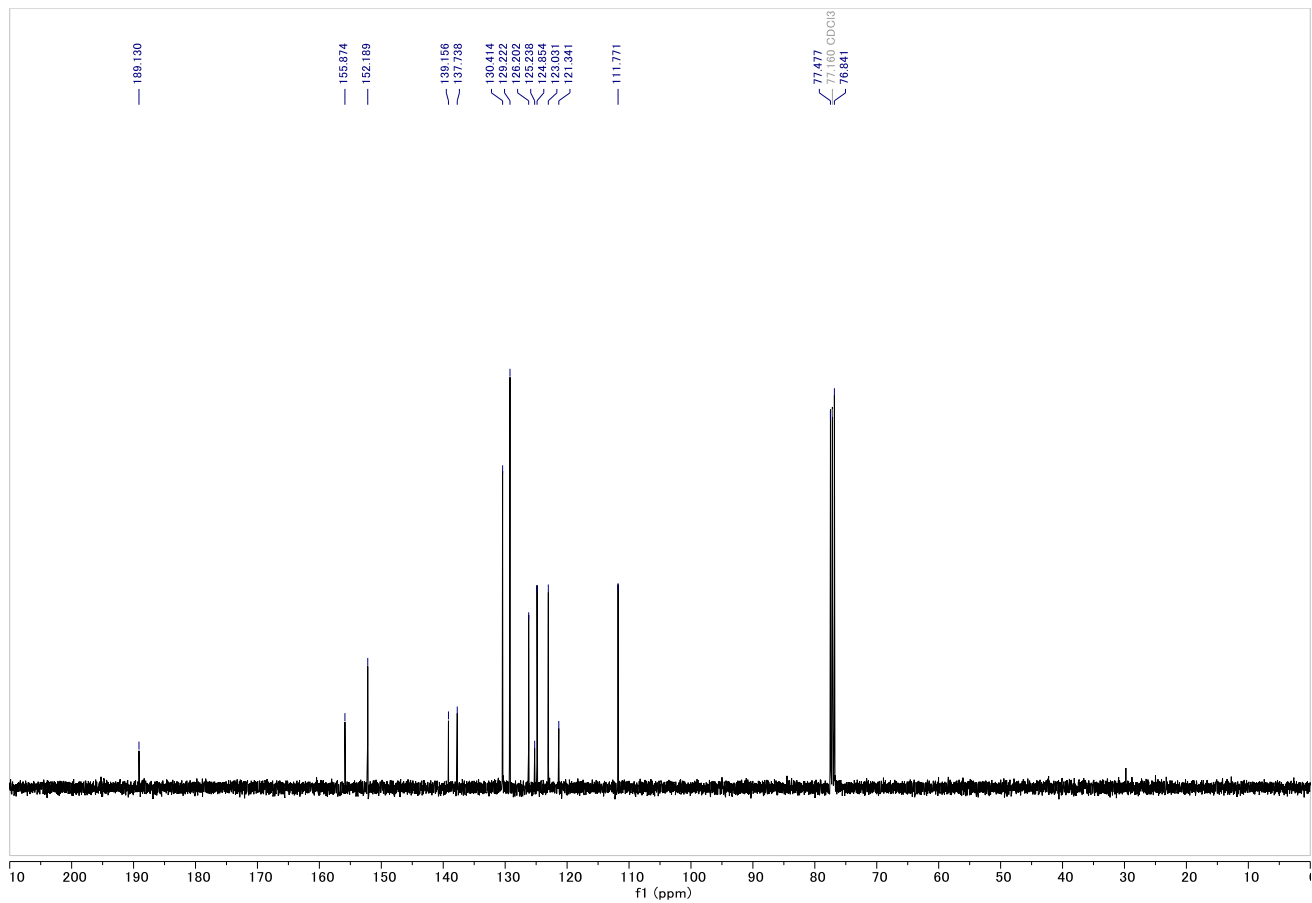

# <sup>1</sup>H NMR 4d

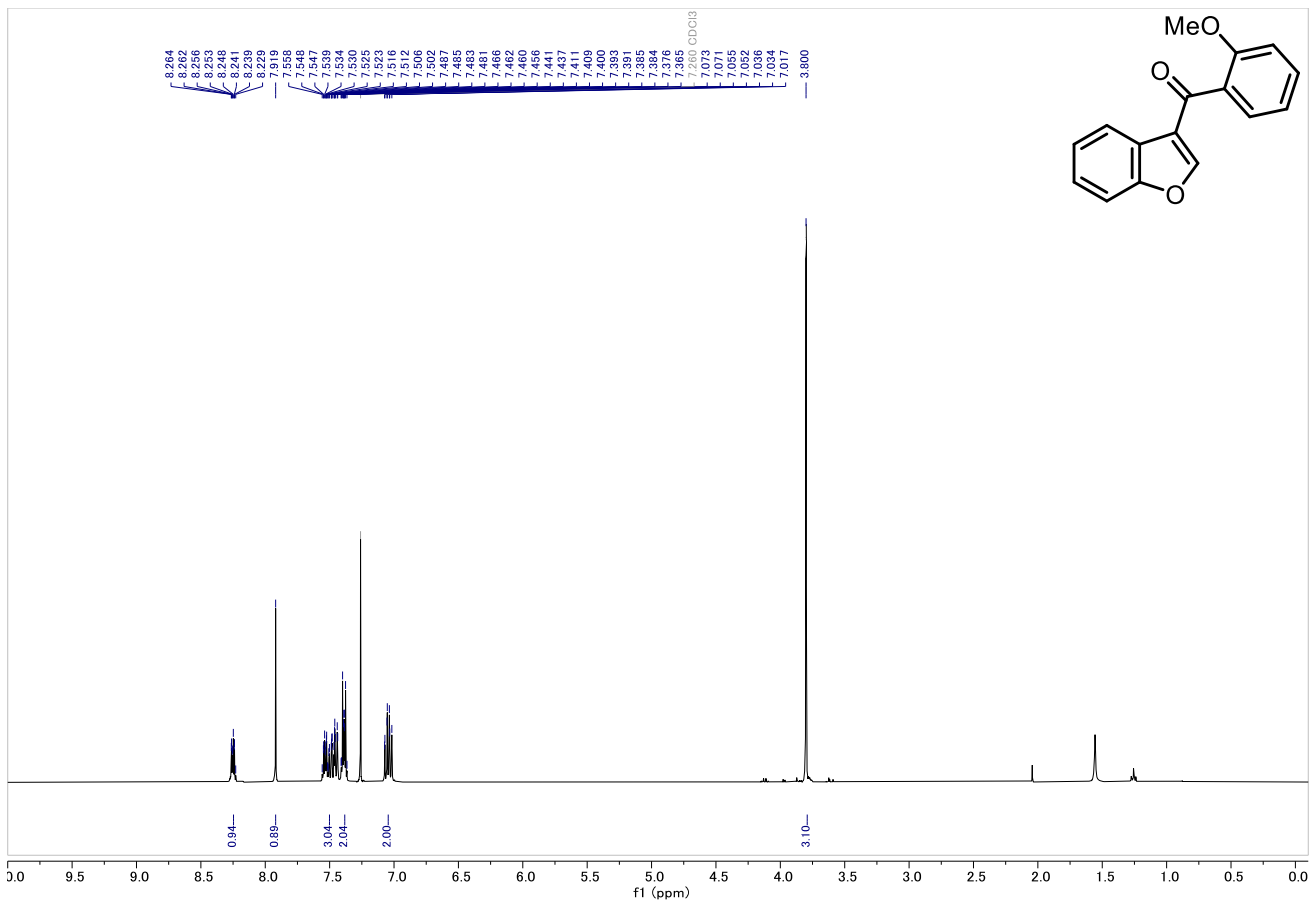

# <sup>13</sup>C NMR 4d

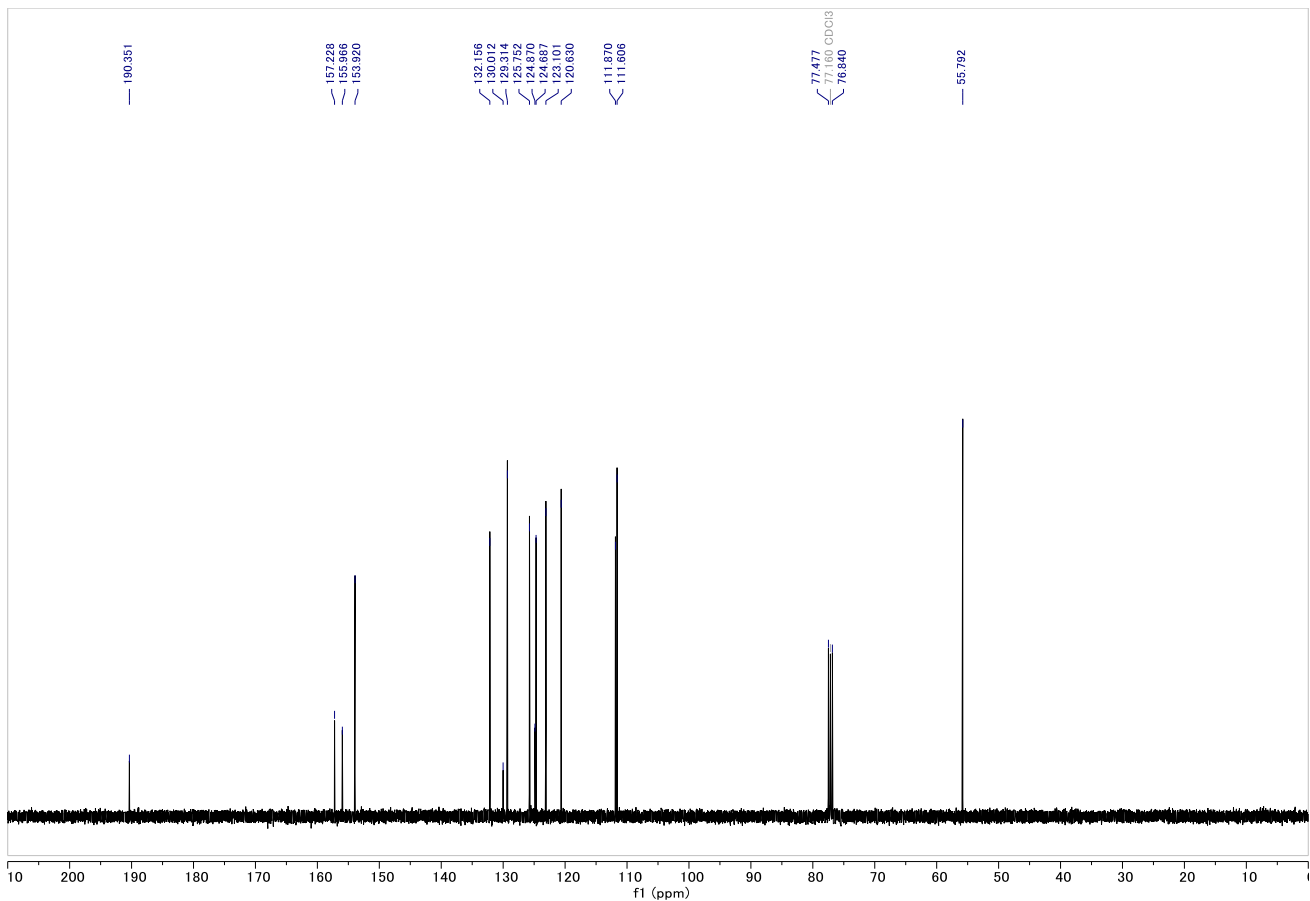

<sup>1</sup>H NMR 4e

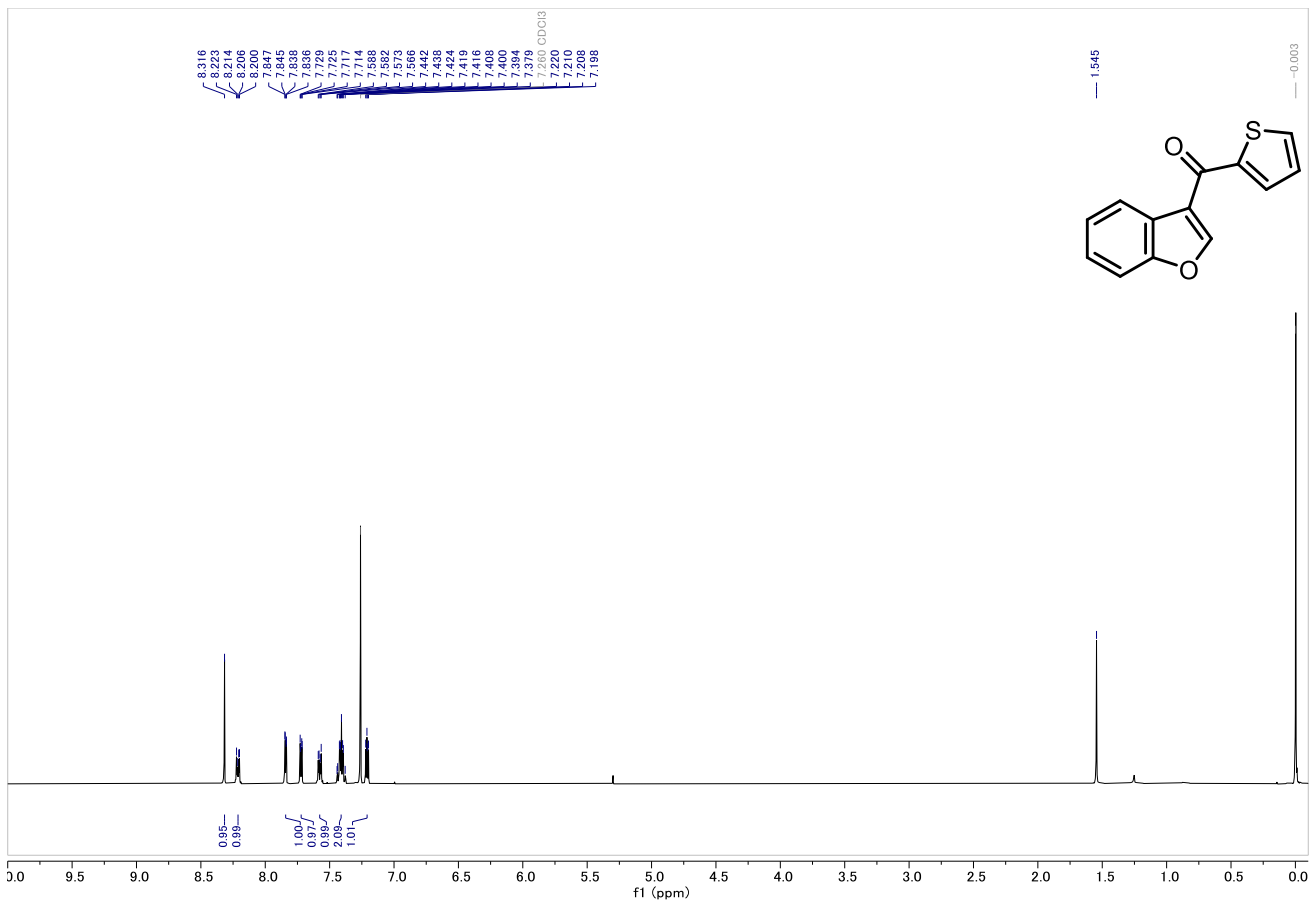

<sup>13</sup>C NMR 4e

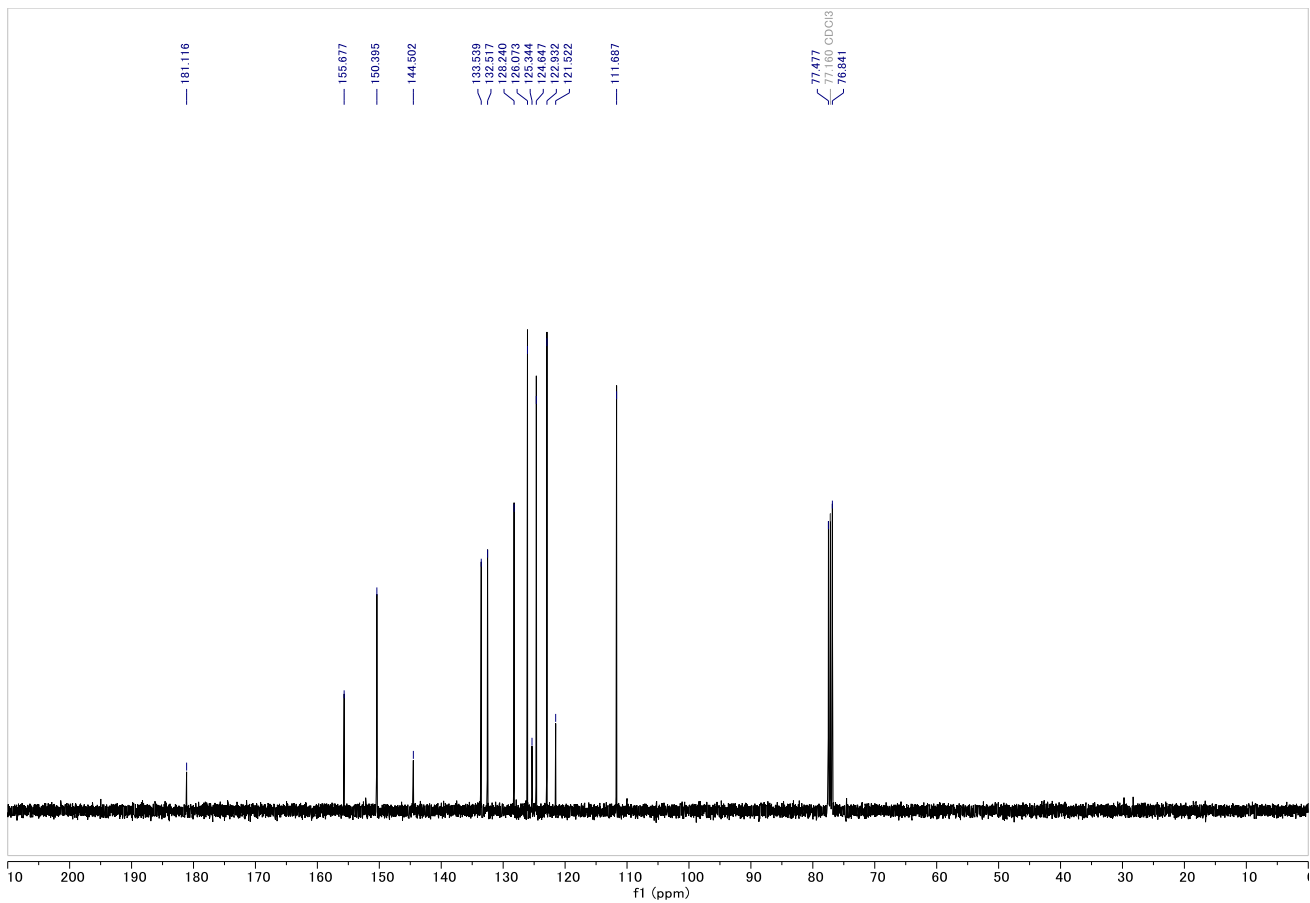

# <sup>1</sup>H NMR 4f

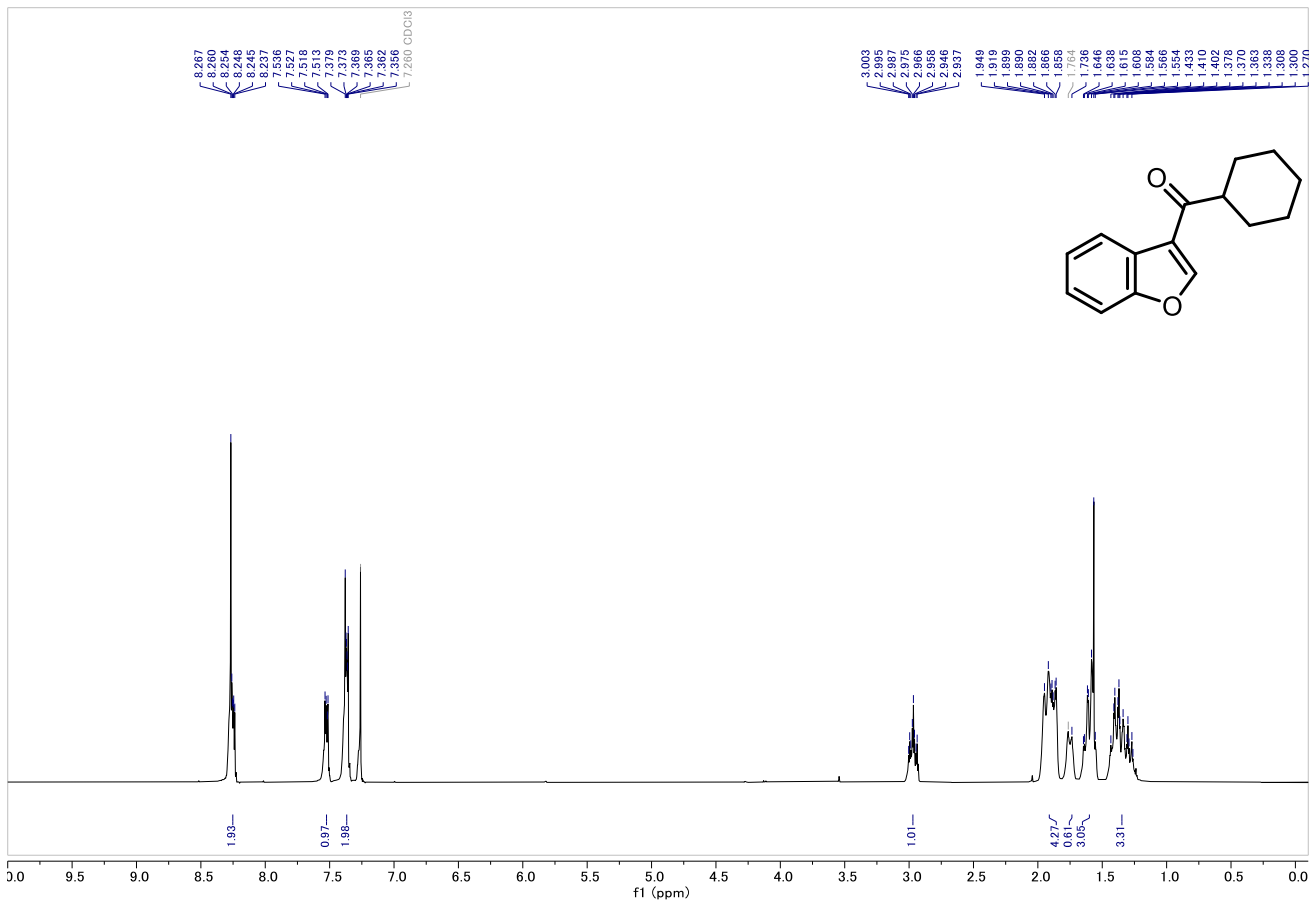

# <sup>13</sup>C NMR 4f

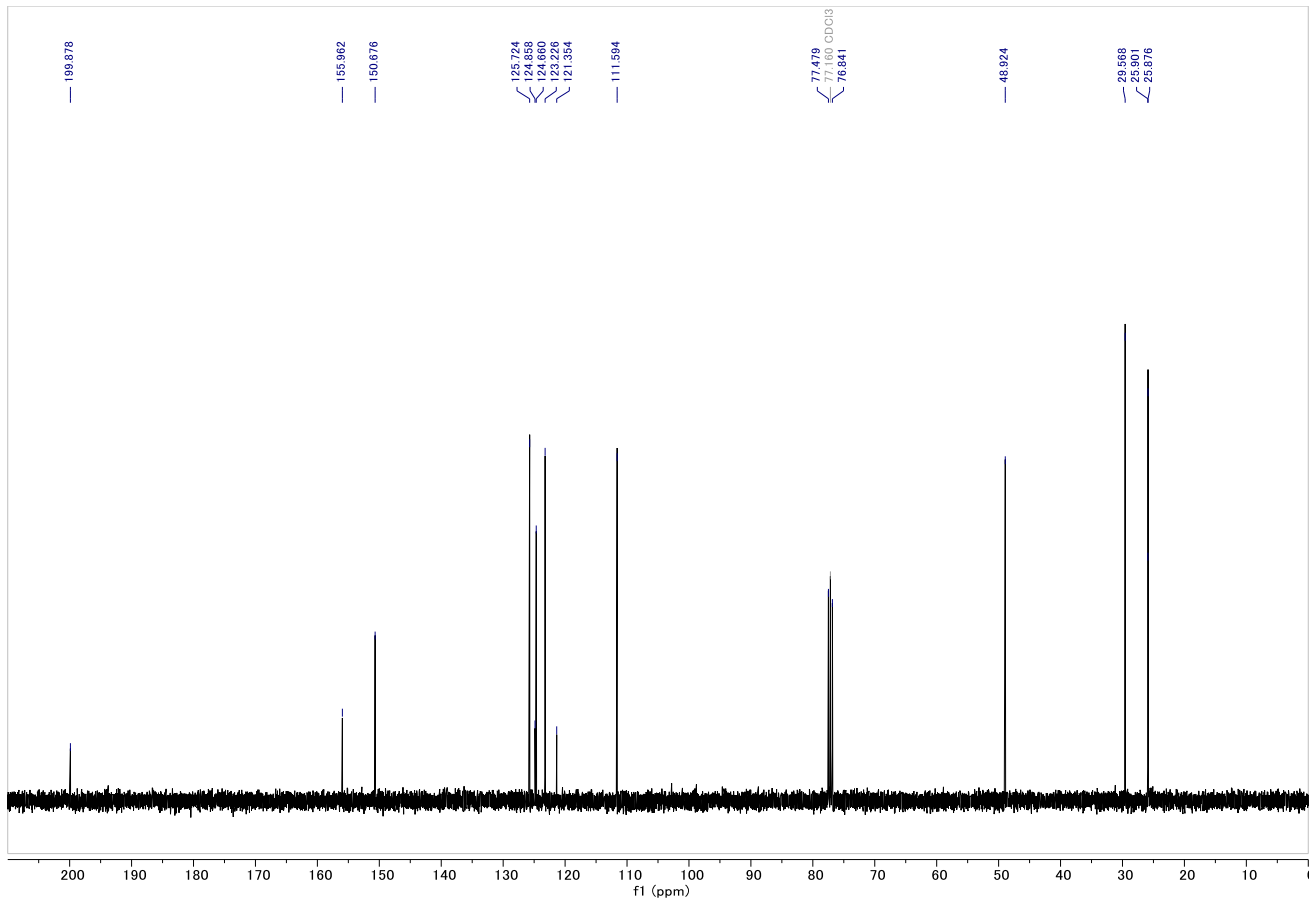



# <sup>1</sup>H NMR 4g

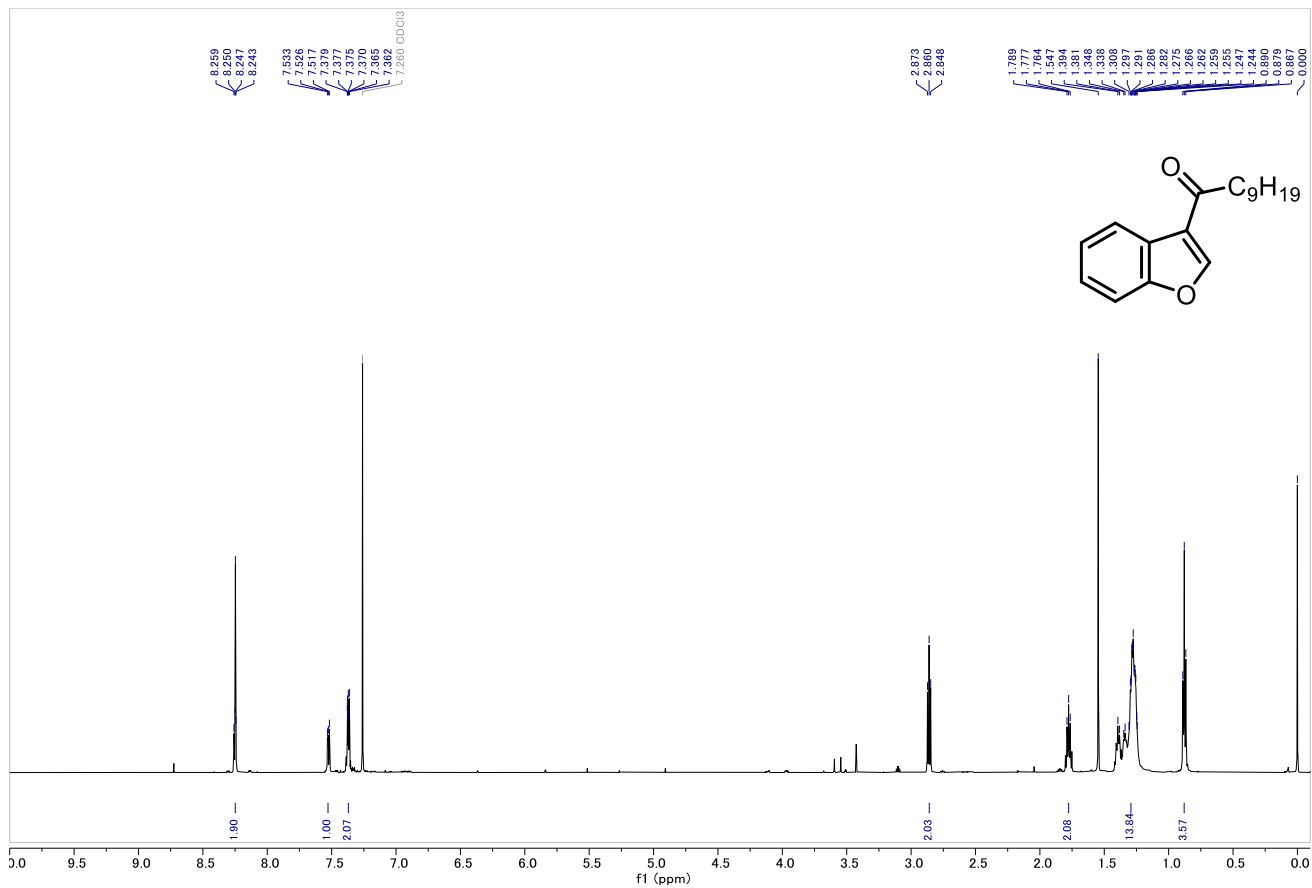

# <sup>13</sup>C NMR 4g

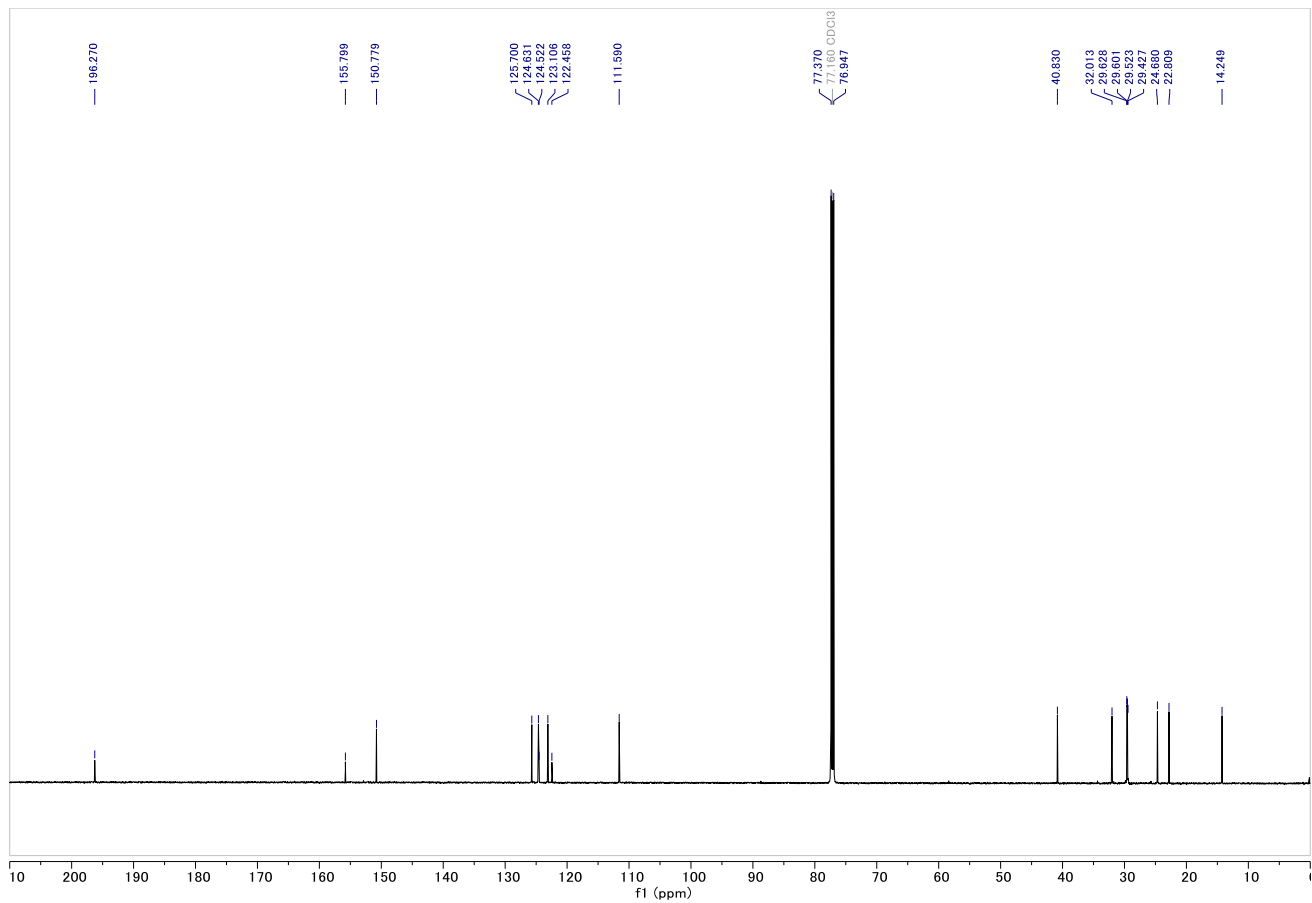



# <sup>1</sup>H NMR 5b

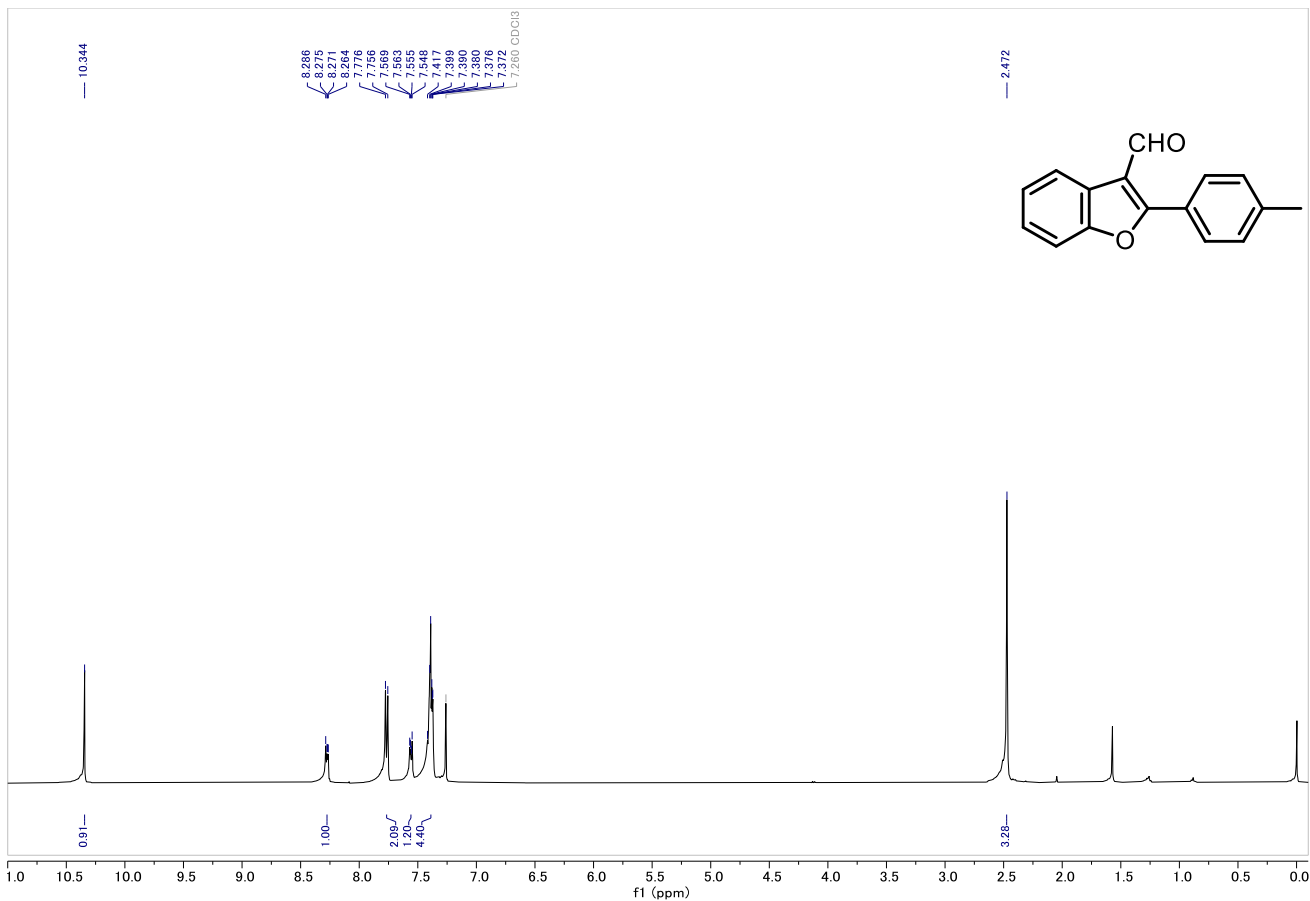

# <sup>13</sup>C NMR 5b

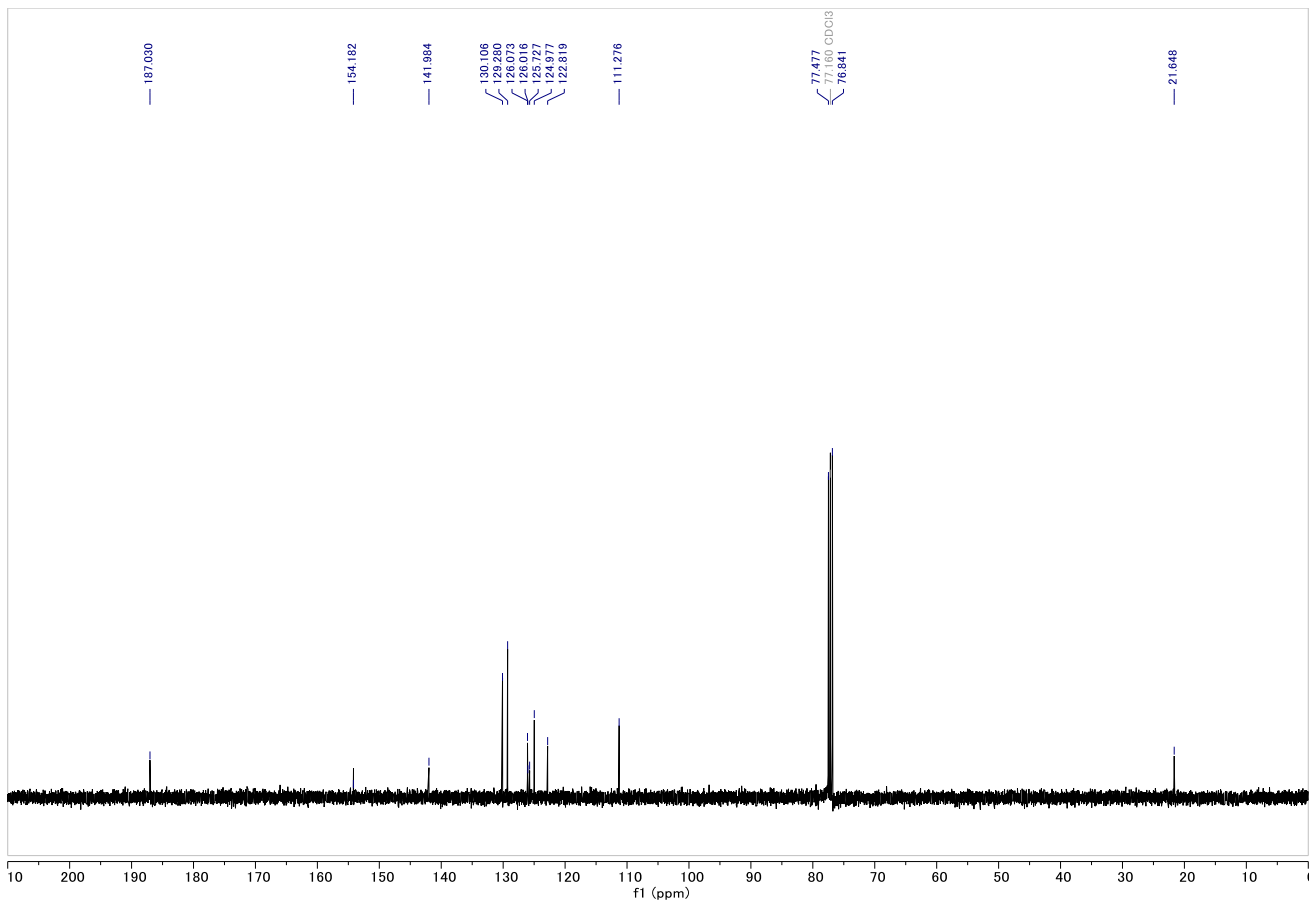

# <sup>1</sup>H NMR 5c

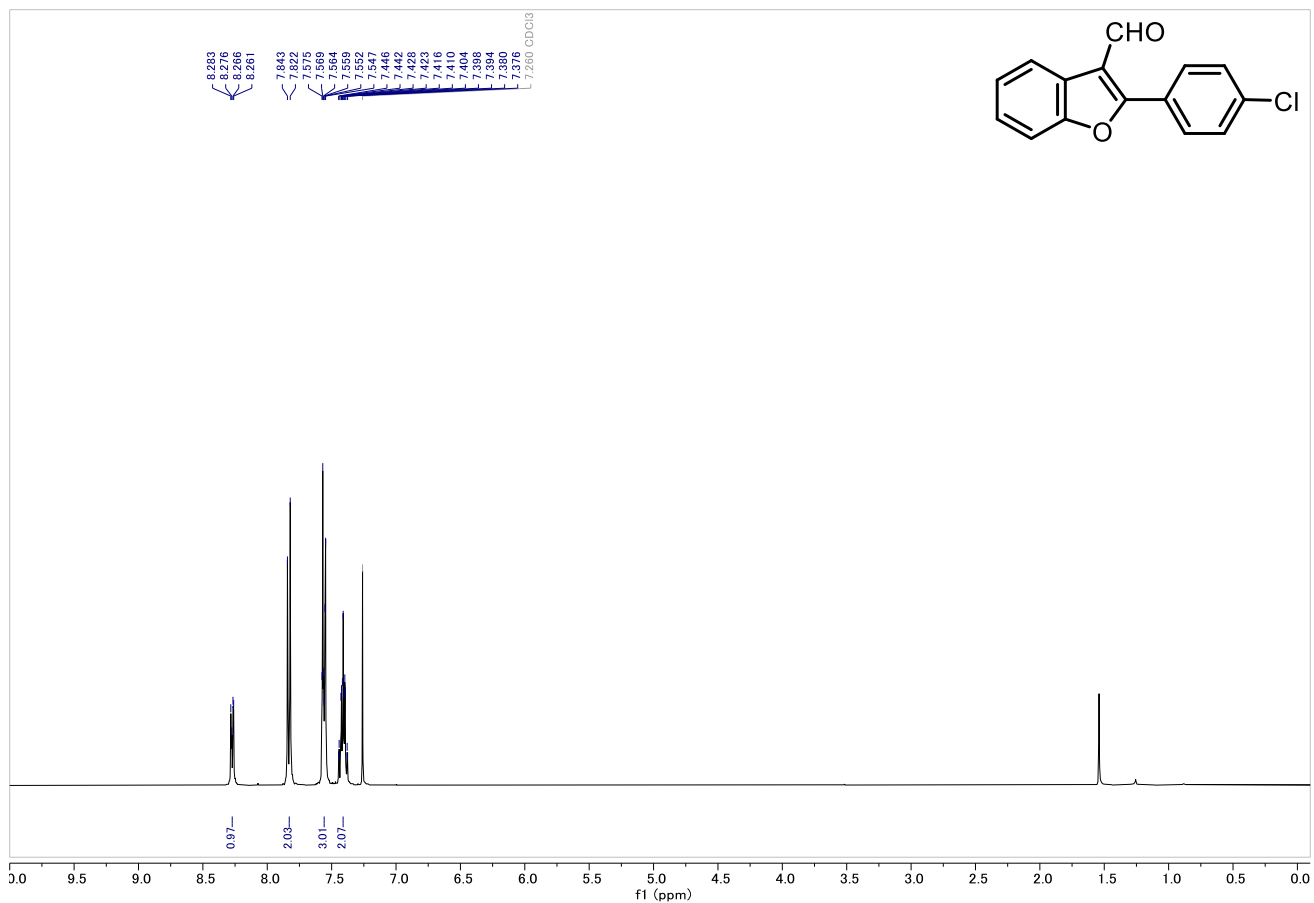

# <sup>13</sup>C NMR 5c

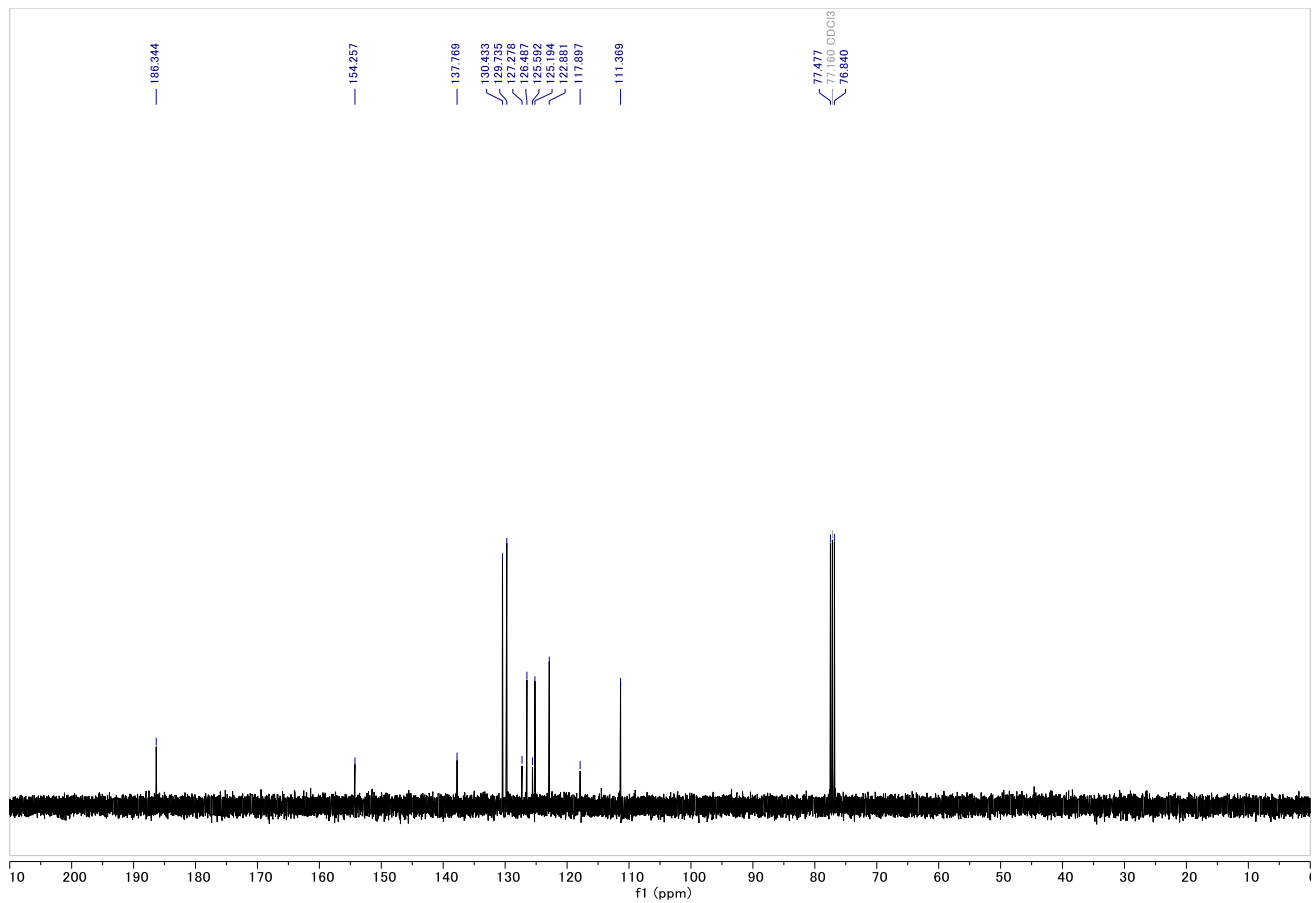

# <sup>1</sup>H NMR 5d

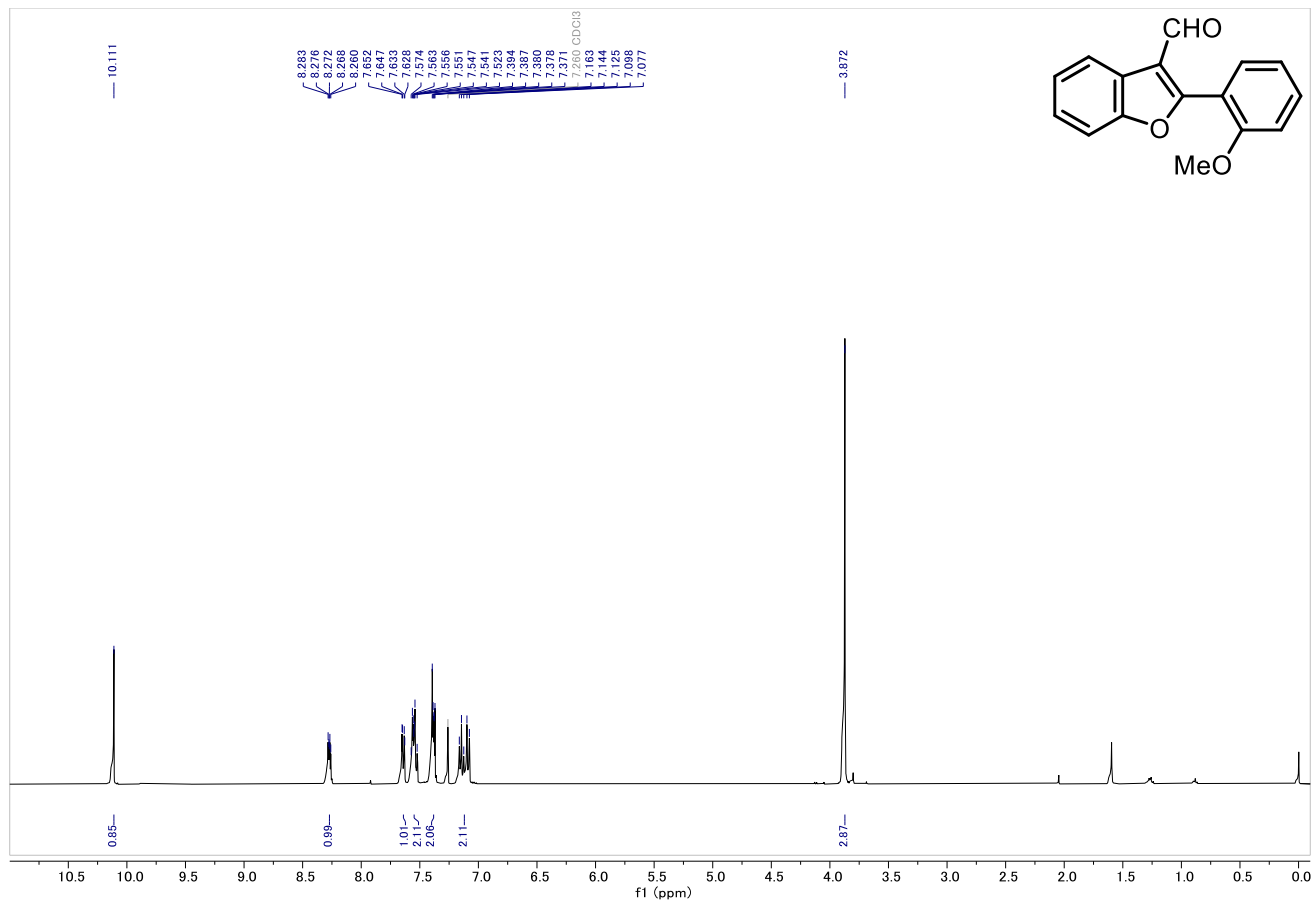

# <sup>13</sup>C NMR 5d

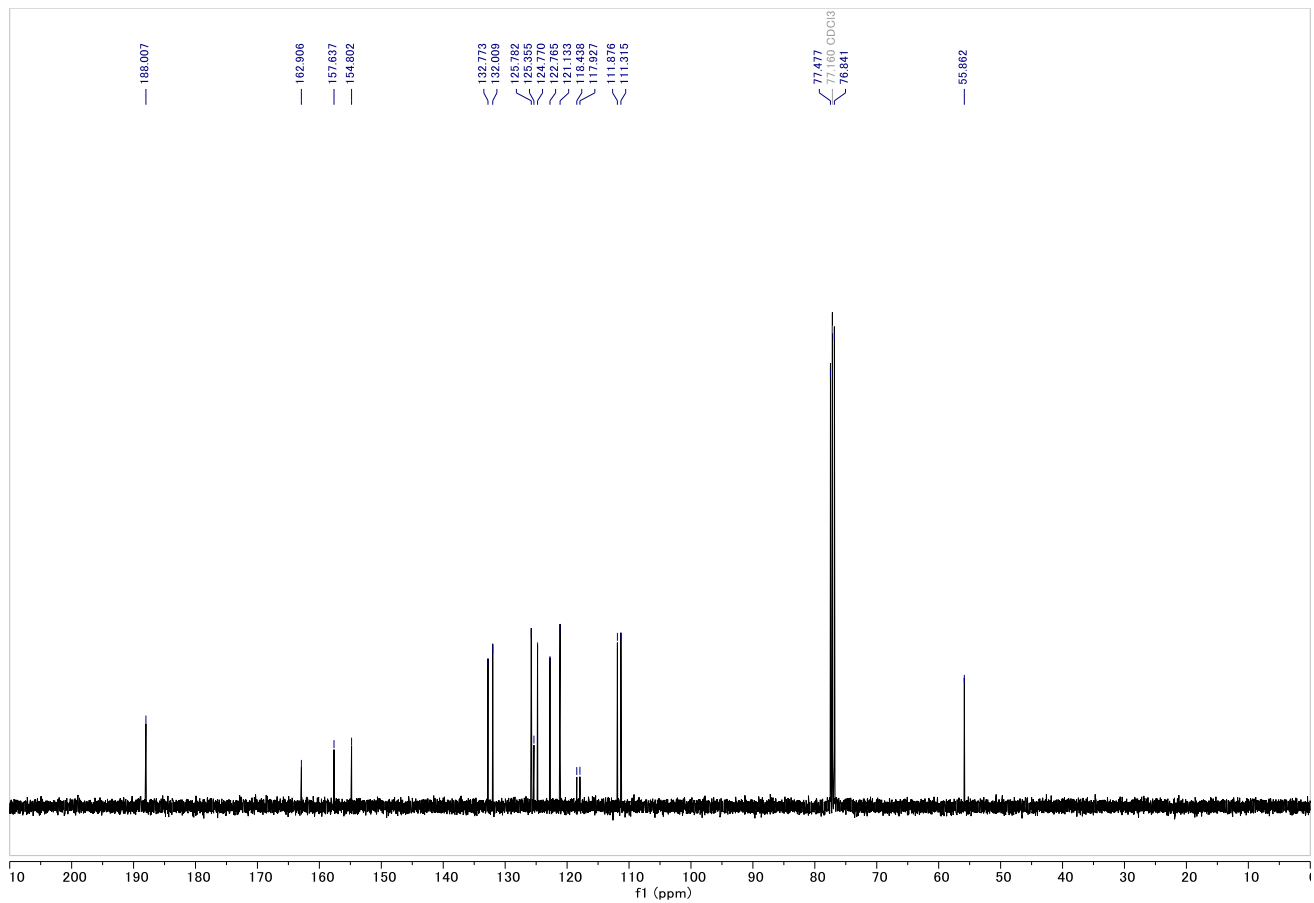

# <sup>1</sup>H NMR 5e

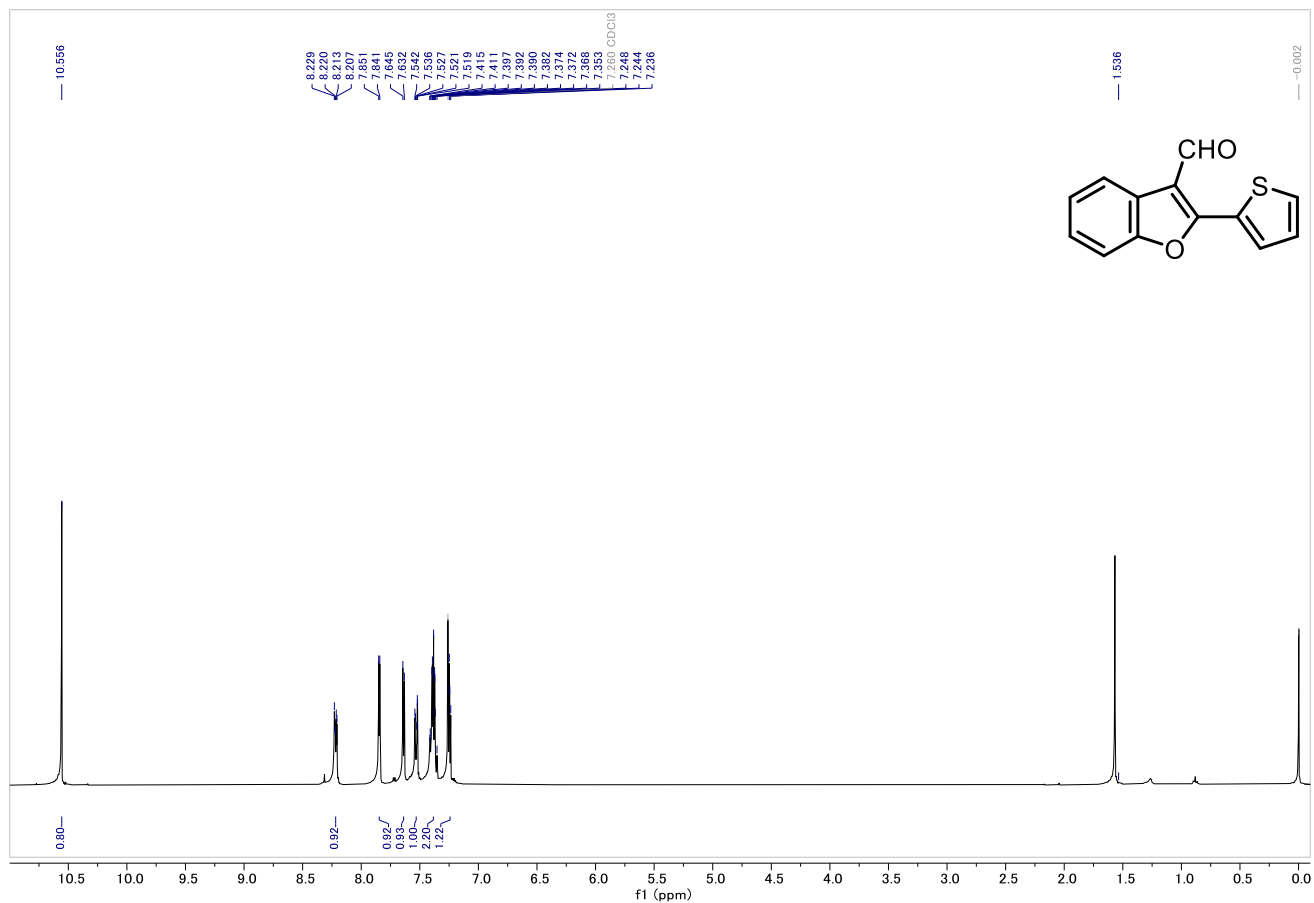

# <sup>13</sup>C NMR 5e

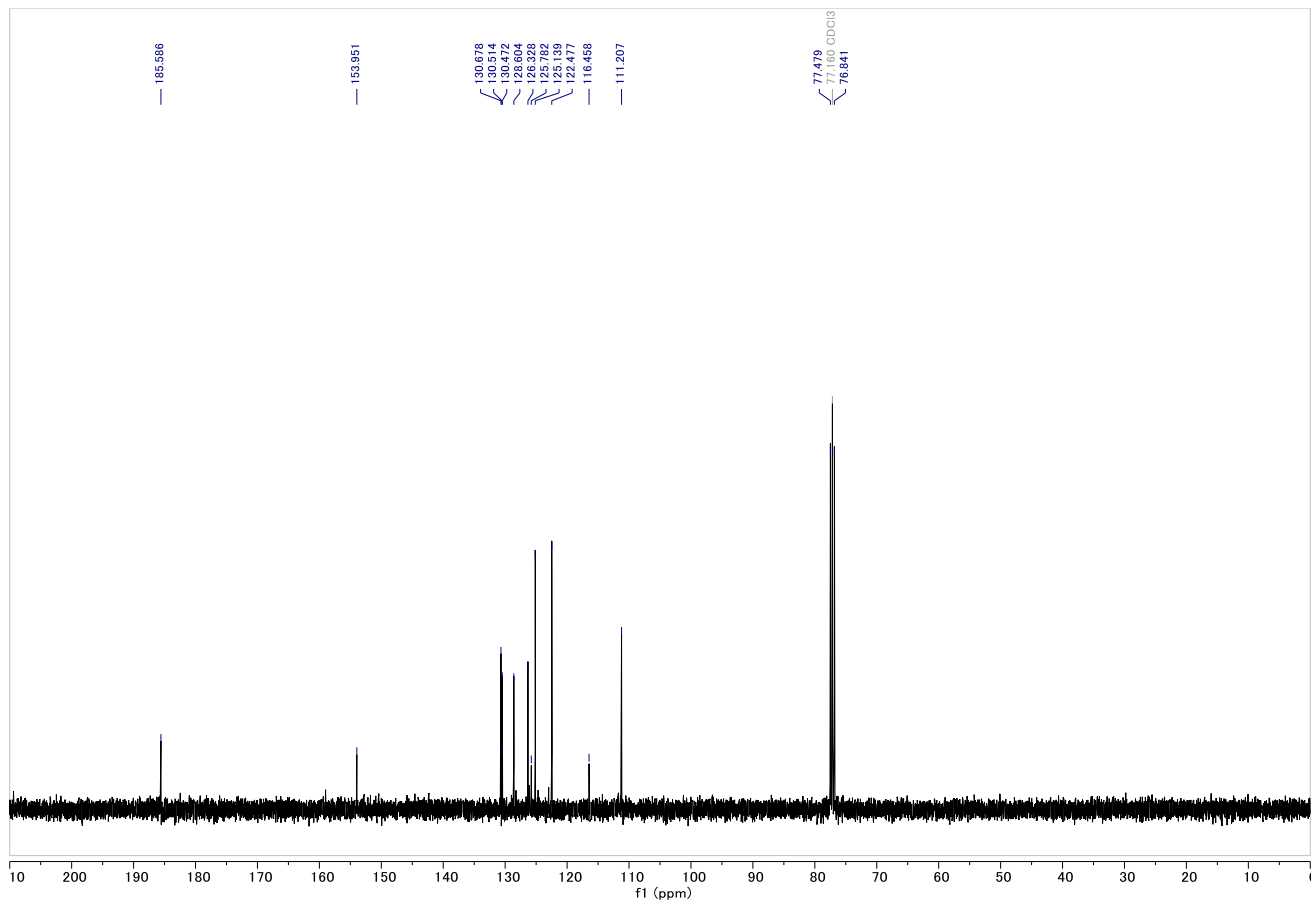

# <sup>1</sup>H NMR 5f

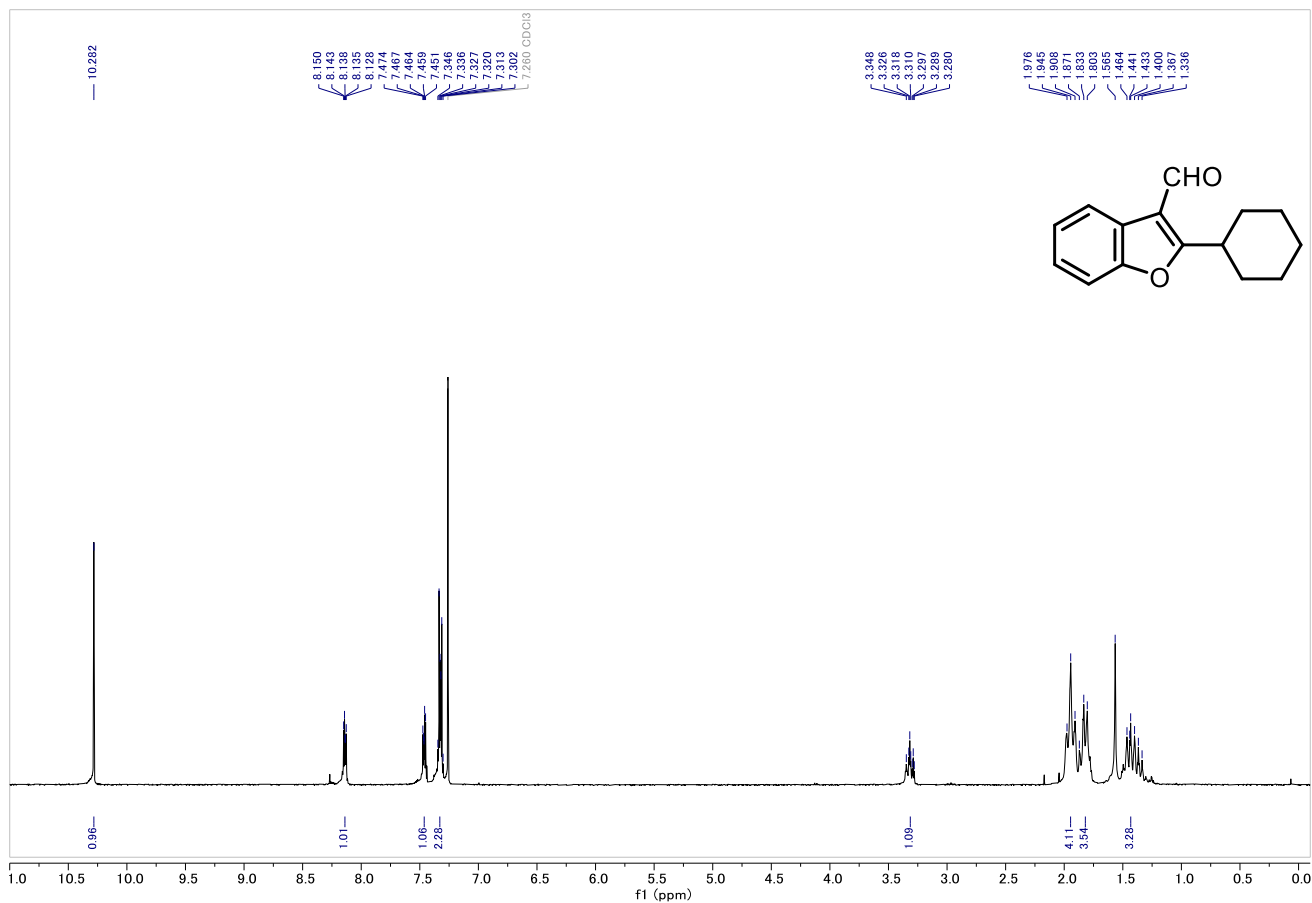

# <sup>13</sup>C NMR 5f

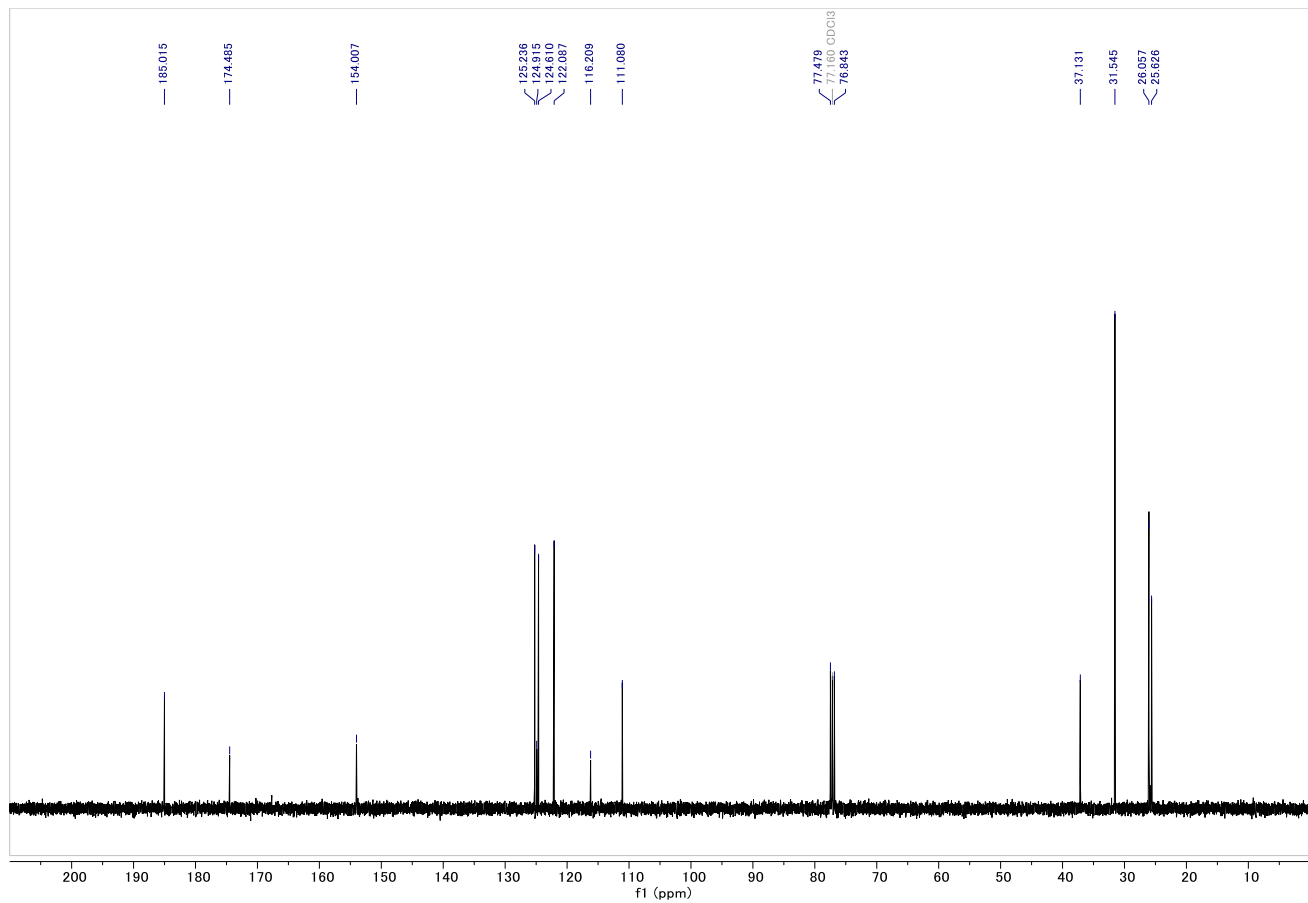

# <sup>1</sup>H NMR 5g

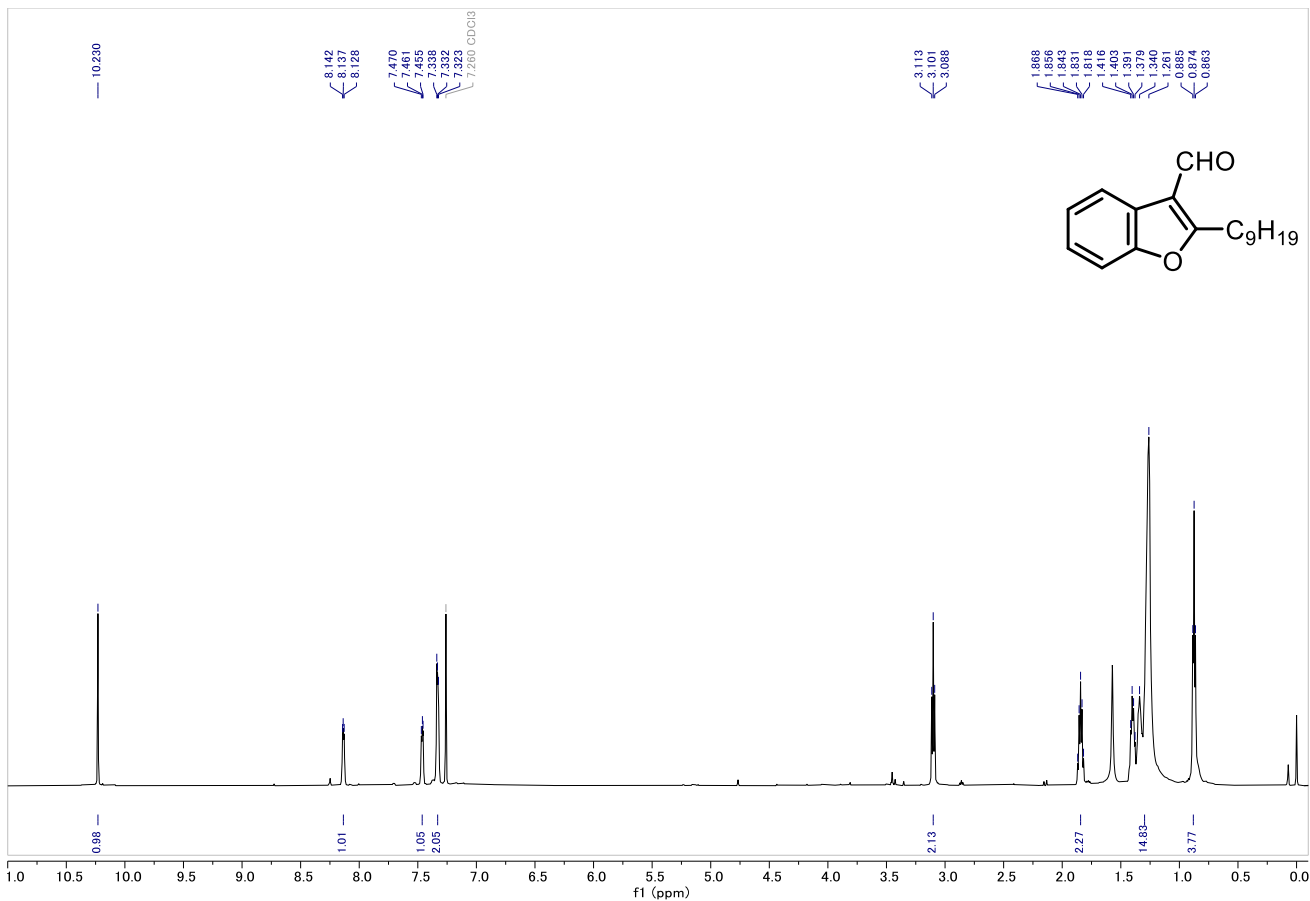

# <sup>13</sup>C NMR 5g

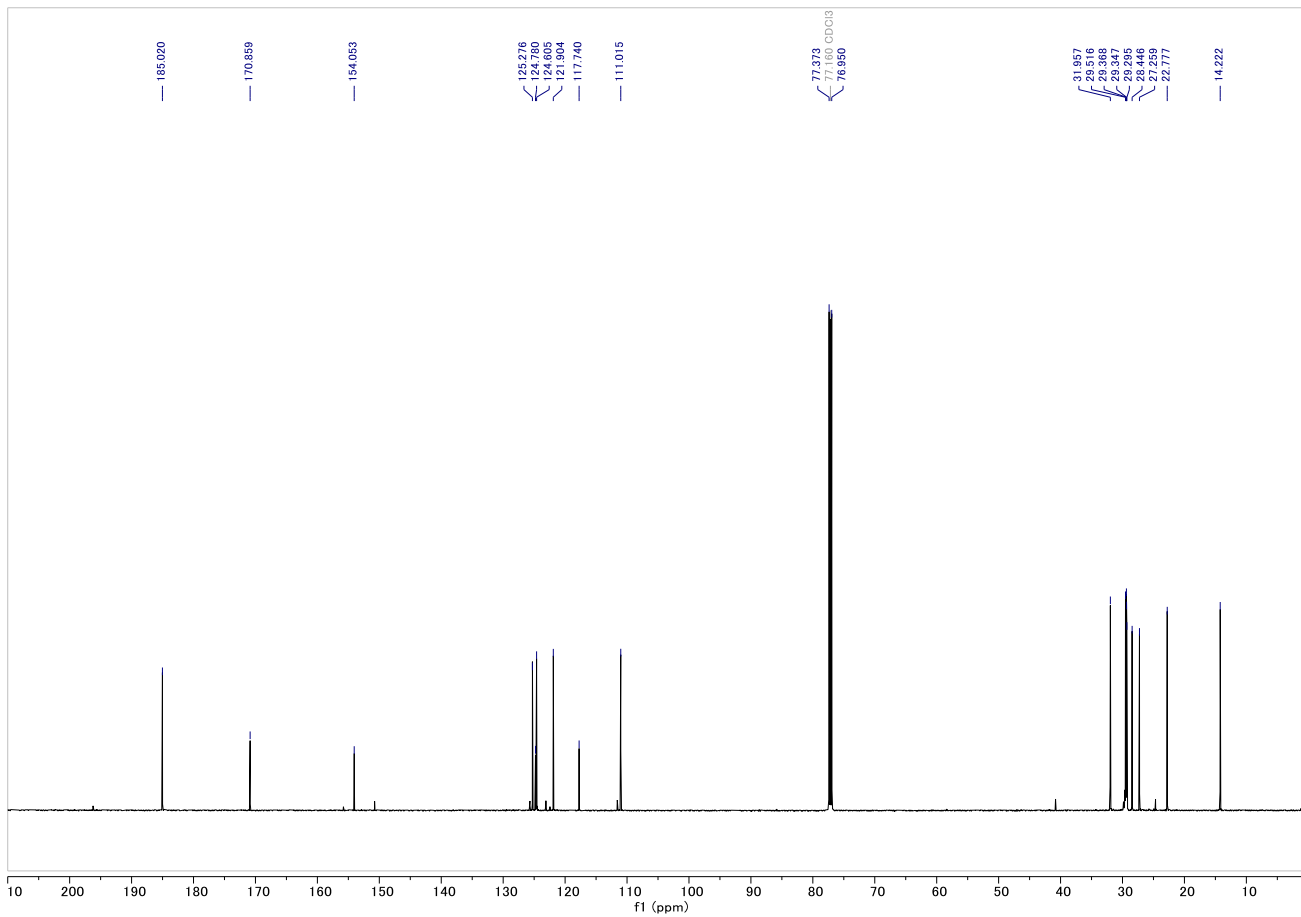



<sup>1</sup>H NMR 6

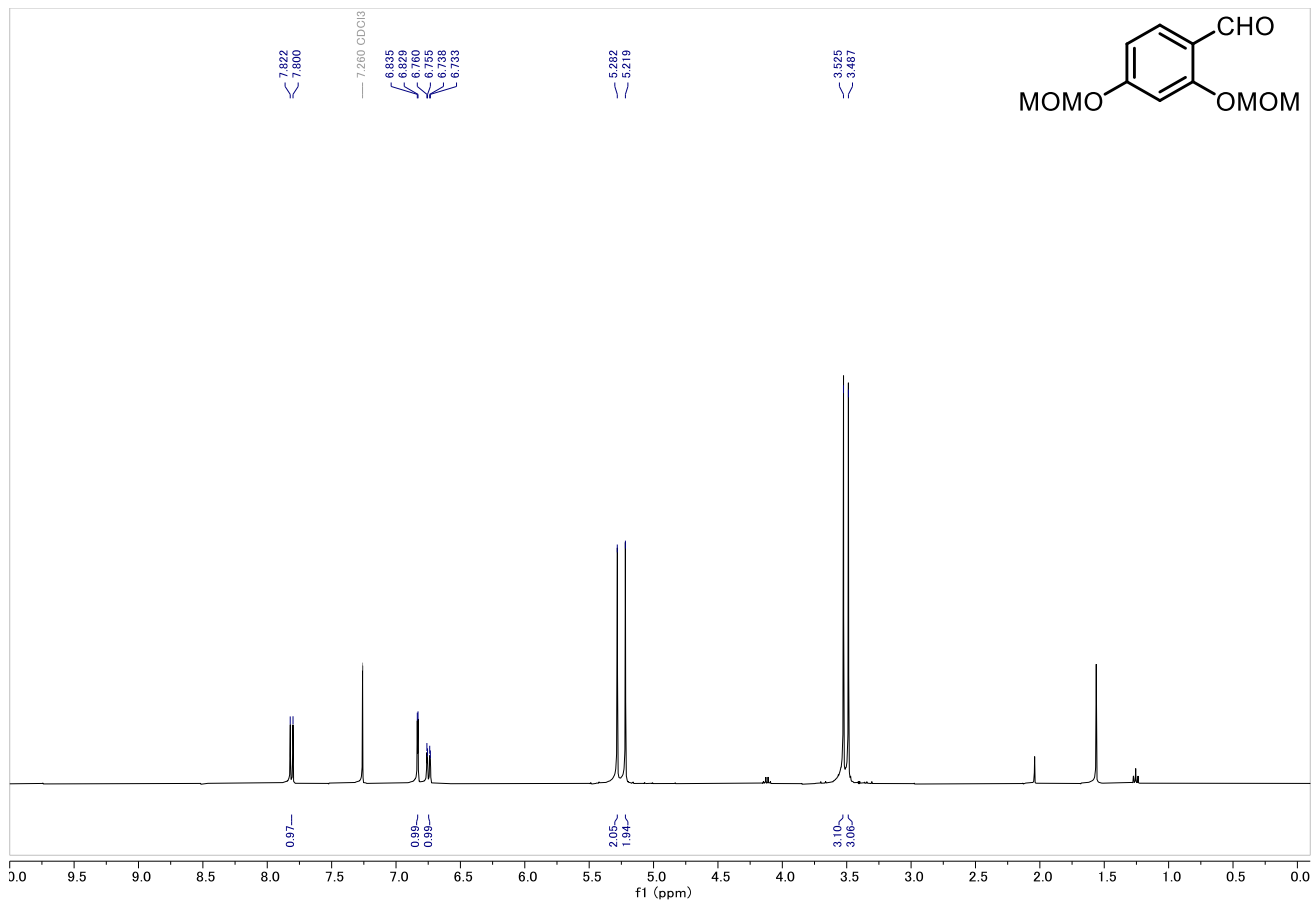

# <sup>1</sup>H NMR 7

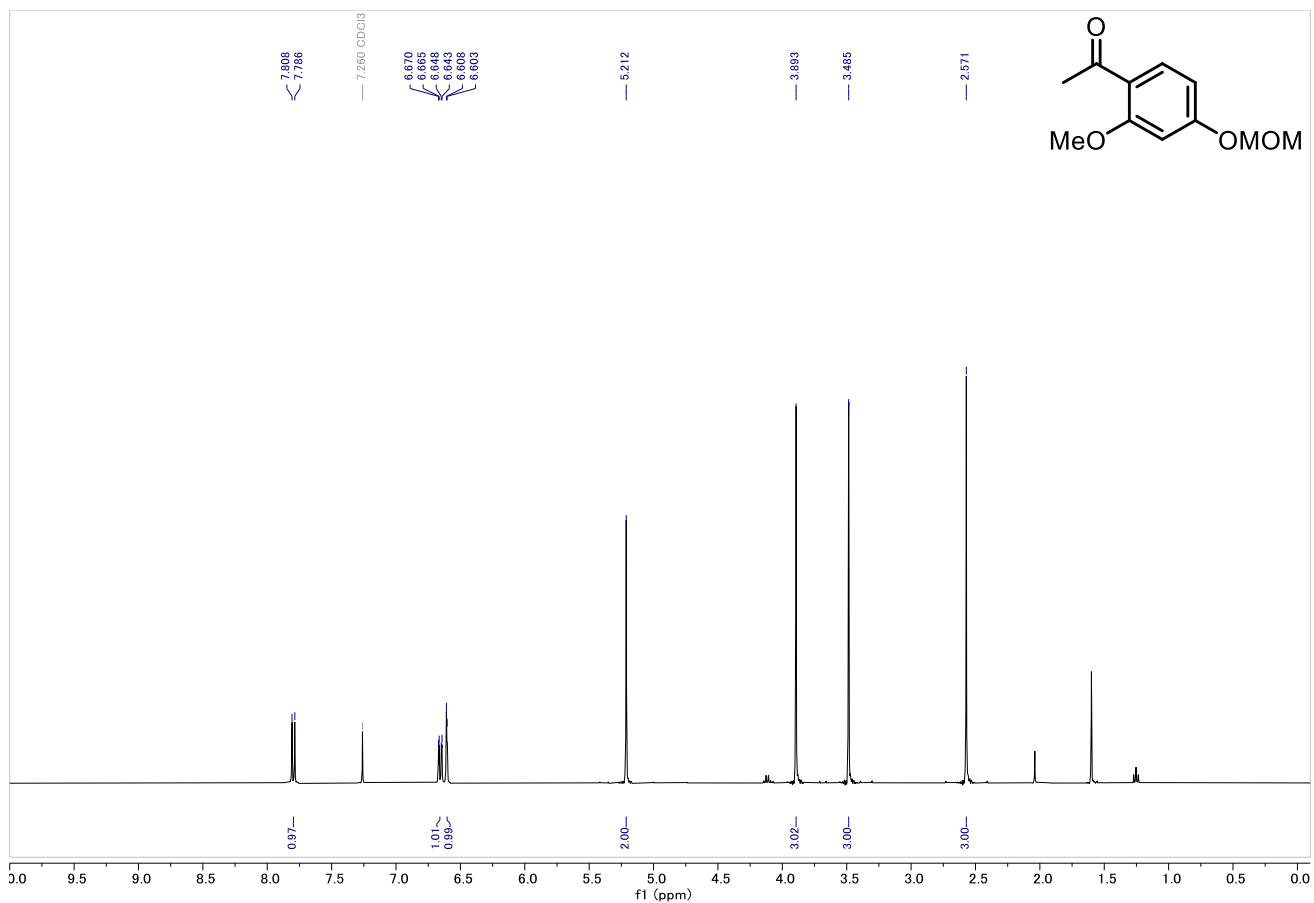

# <sup>13</sup>C NMR 7

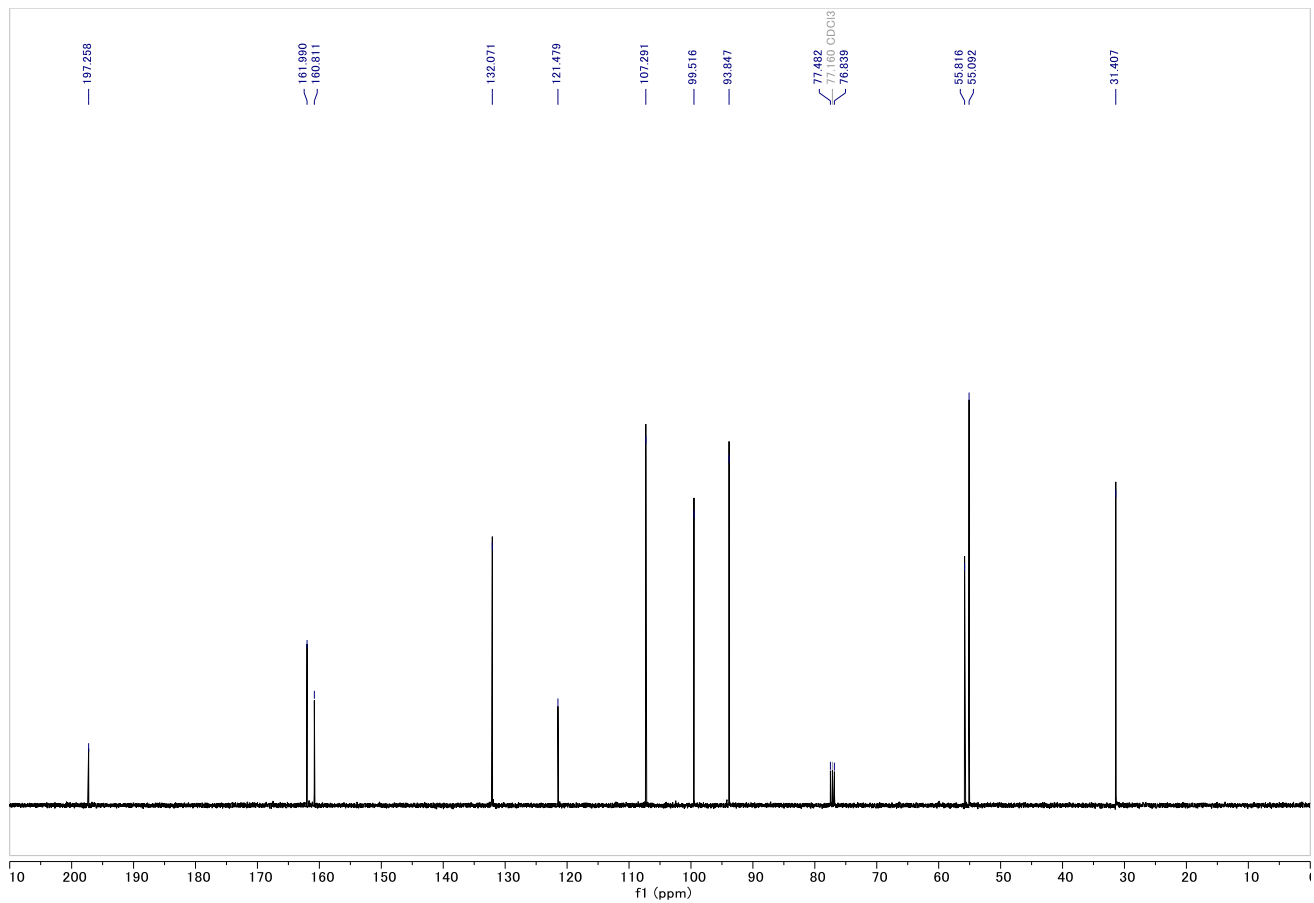

# <sup>1</sup>H NMR 8

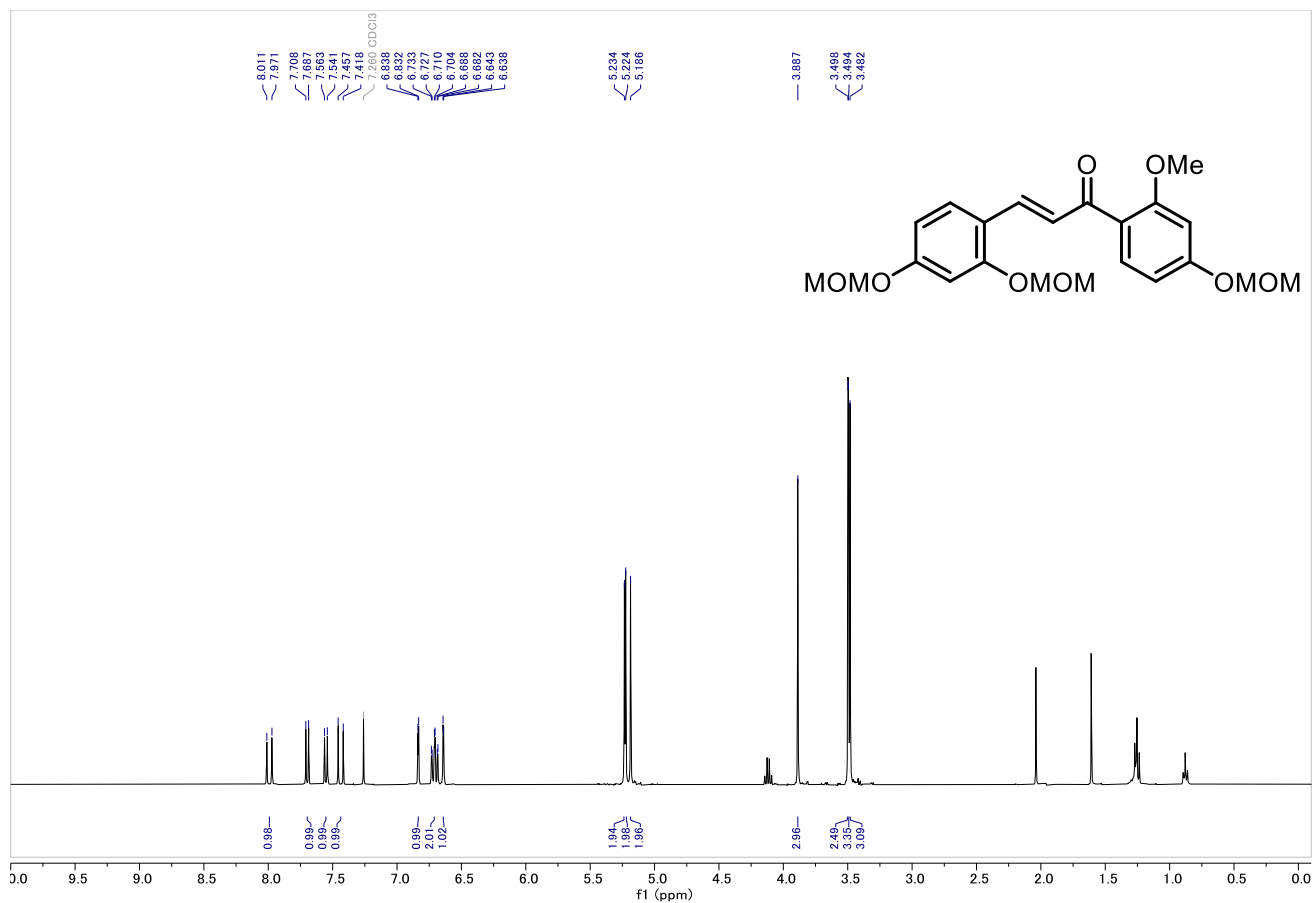

# <sup>13</sup>C NMR 8

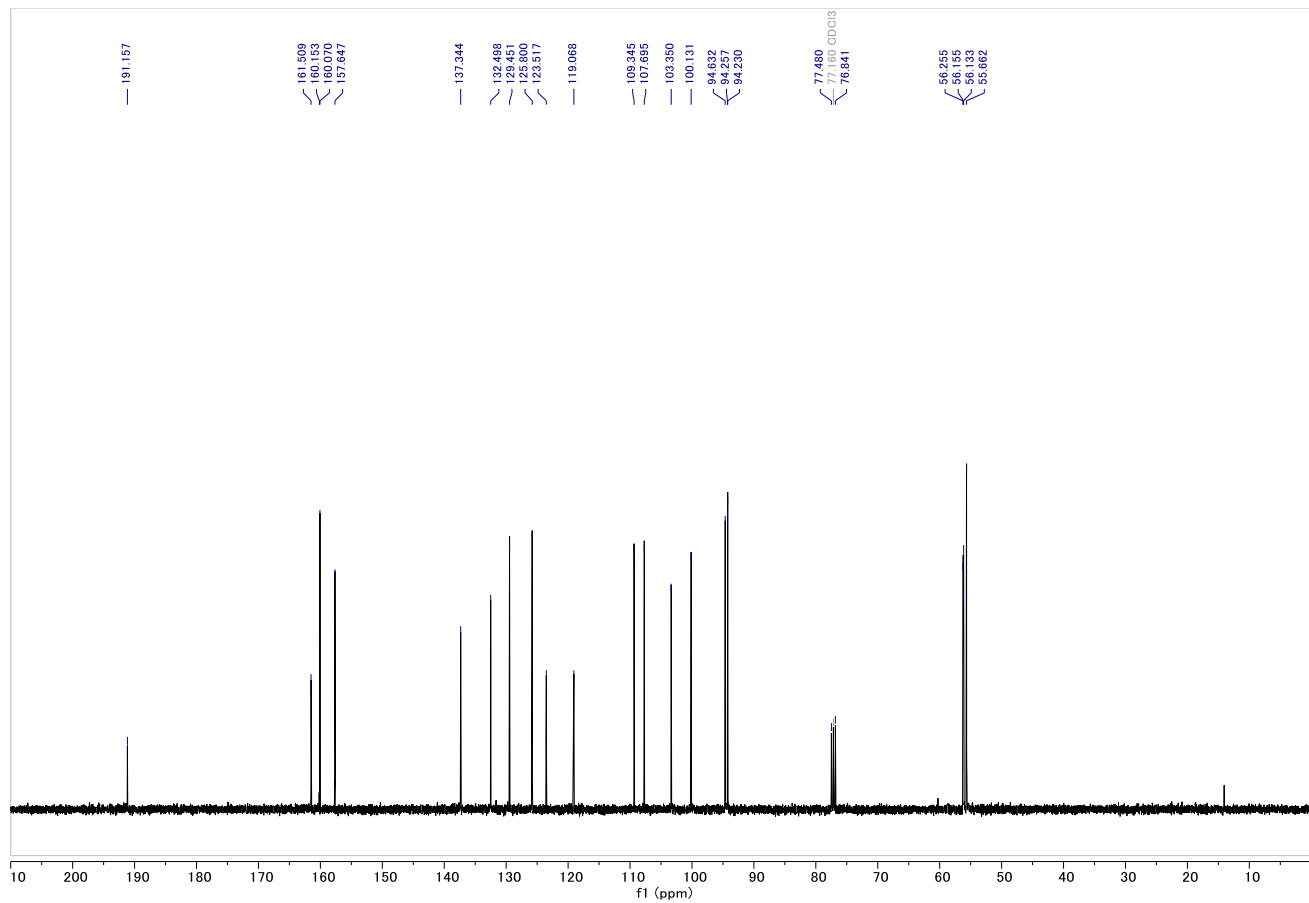

# <sup>1</sup>H NMR 9

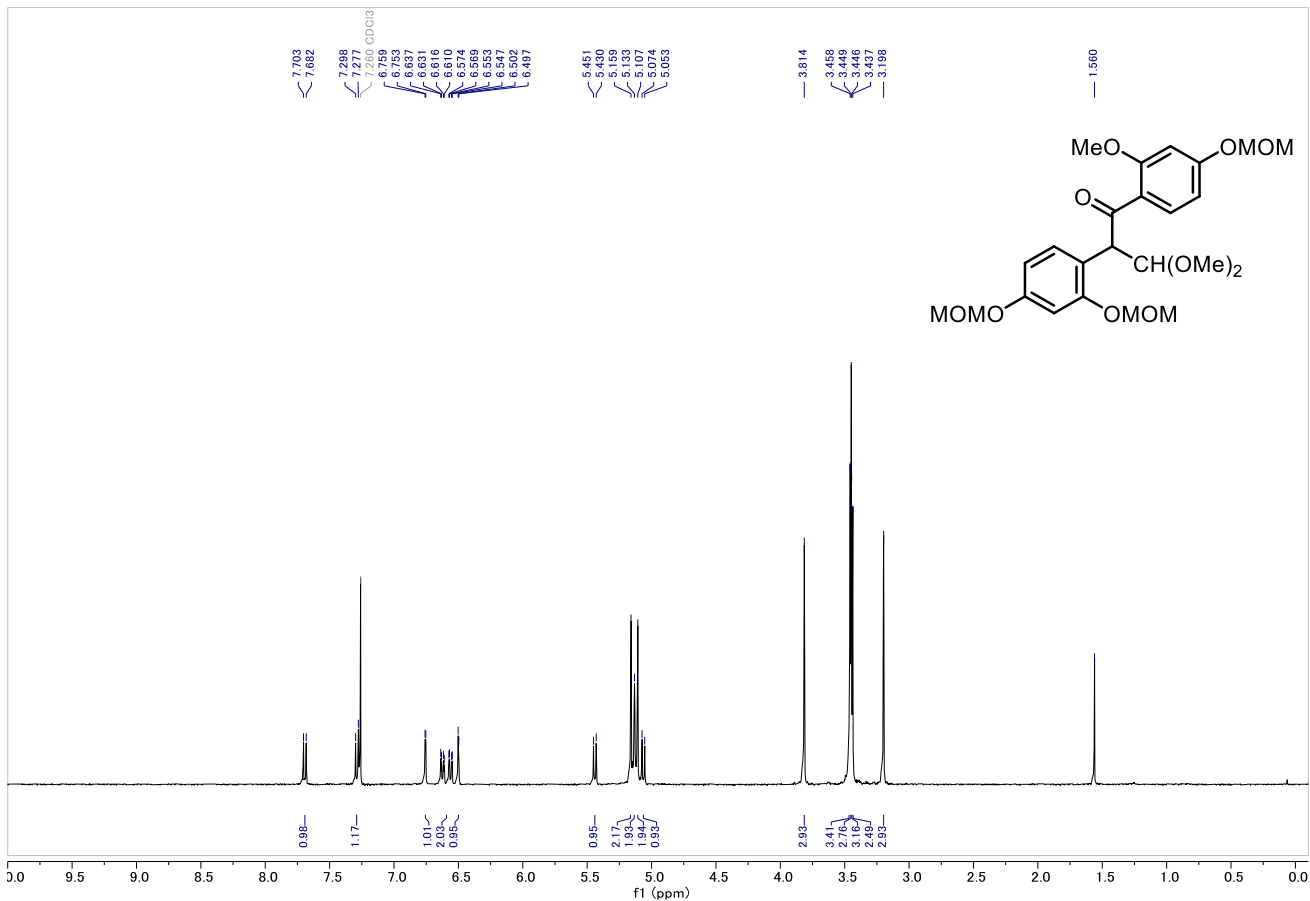

# <sup>13</sup>C NMR 9

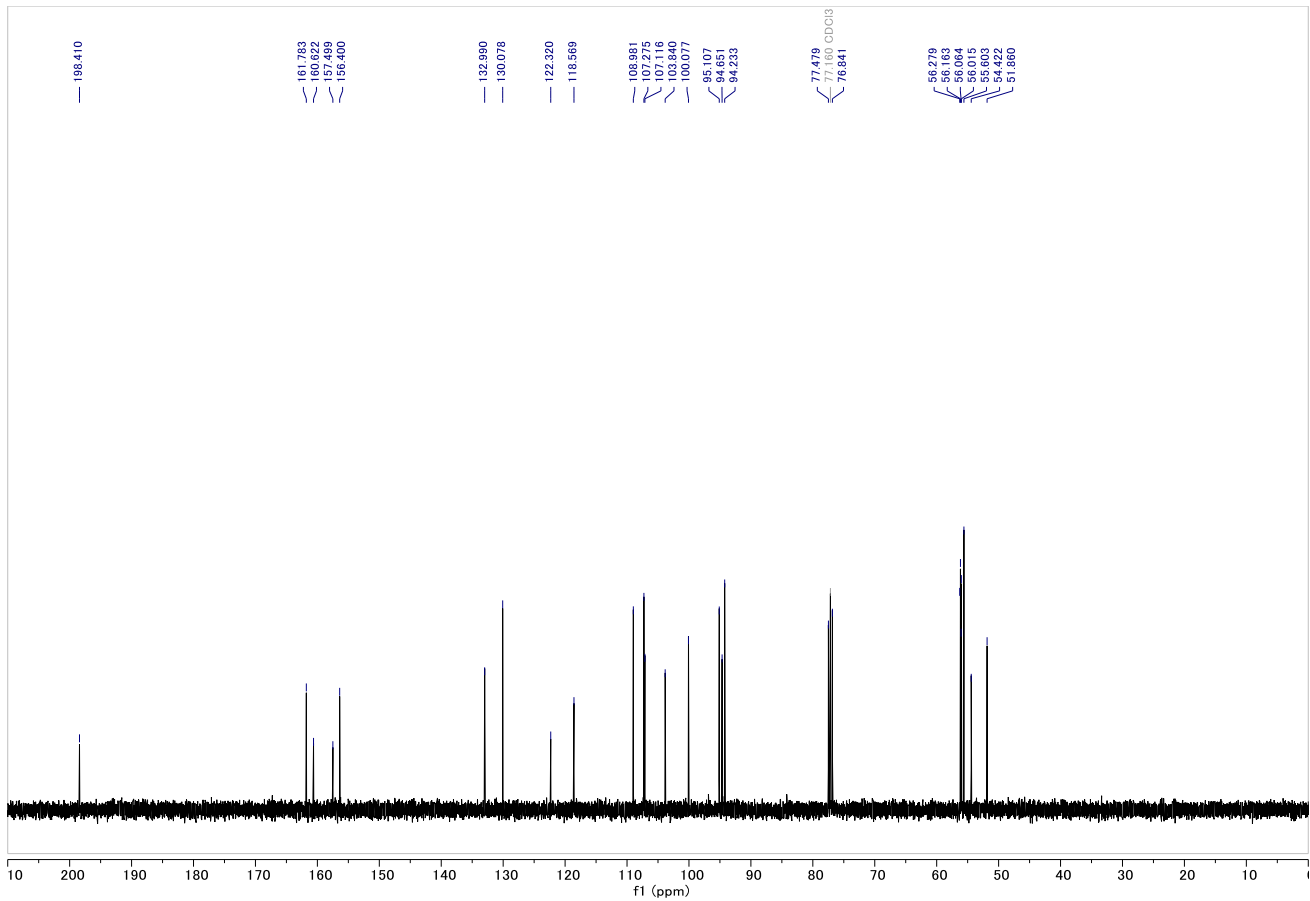

# <sup>1</sup>H NMR 10

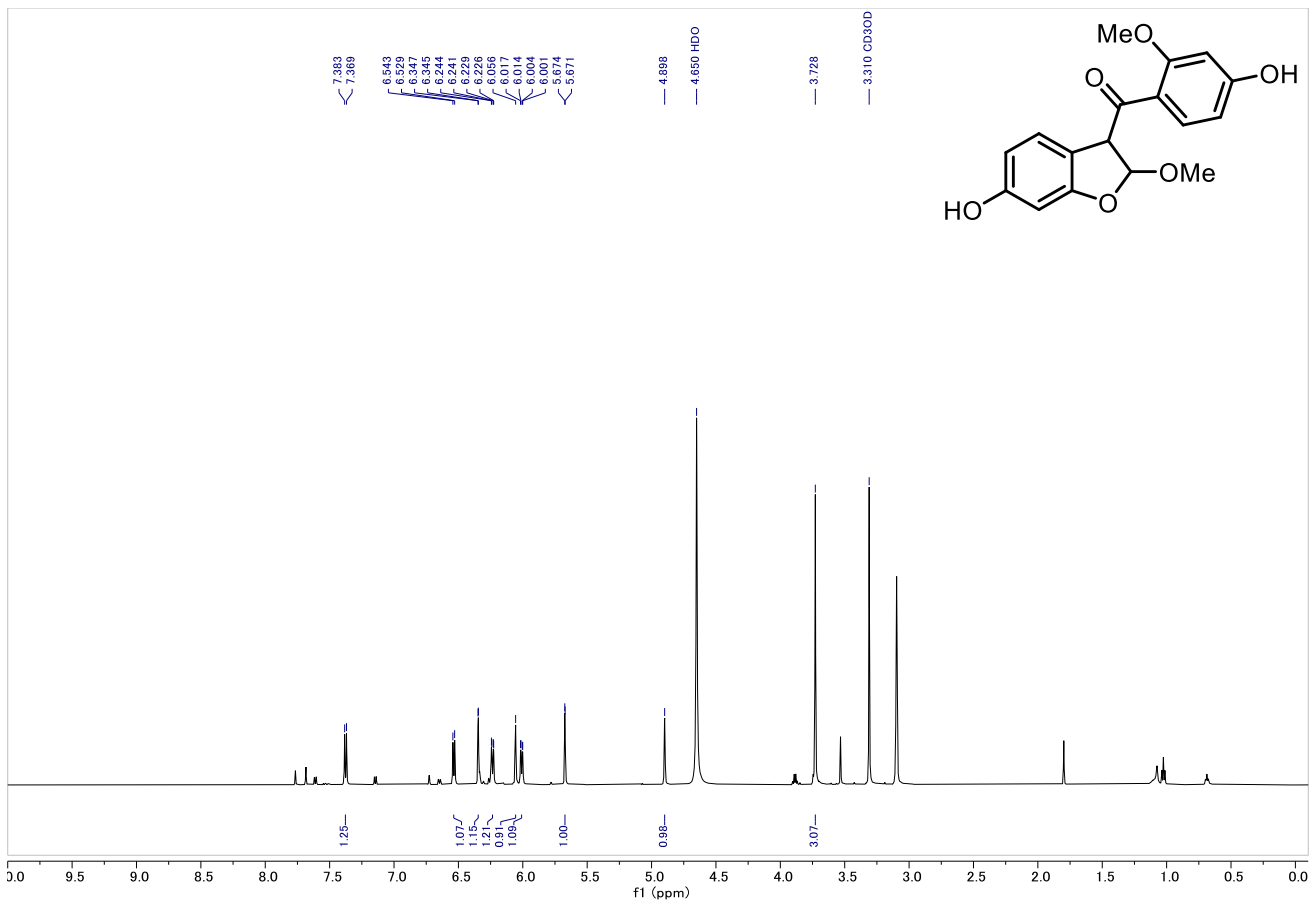

# <sup>13</sup>C NMR 10

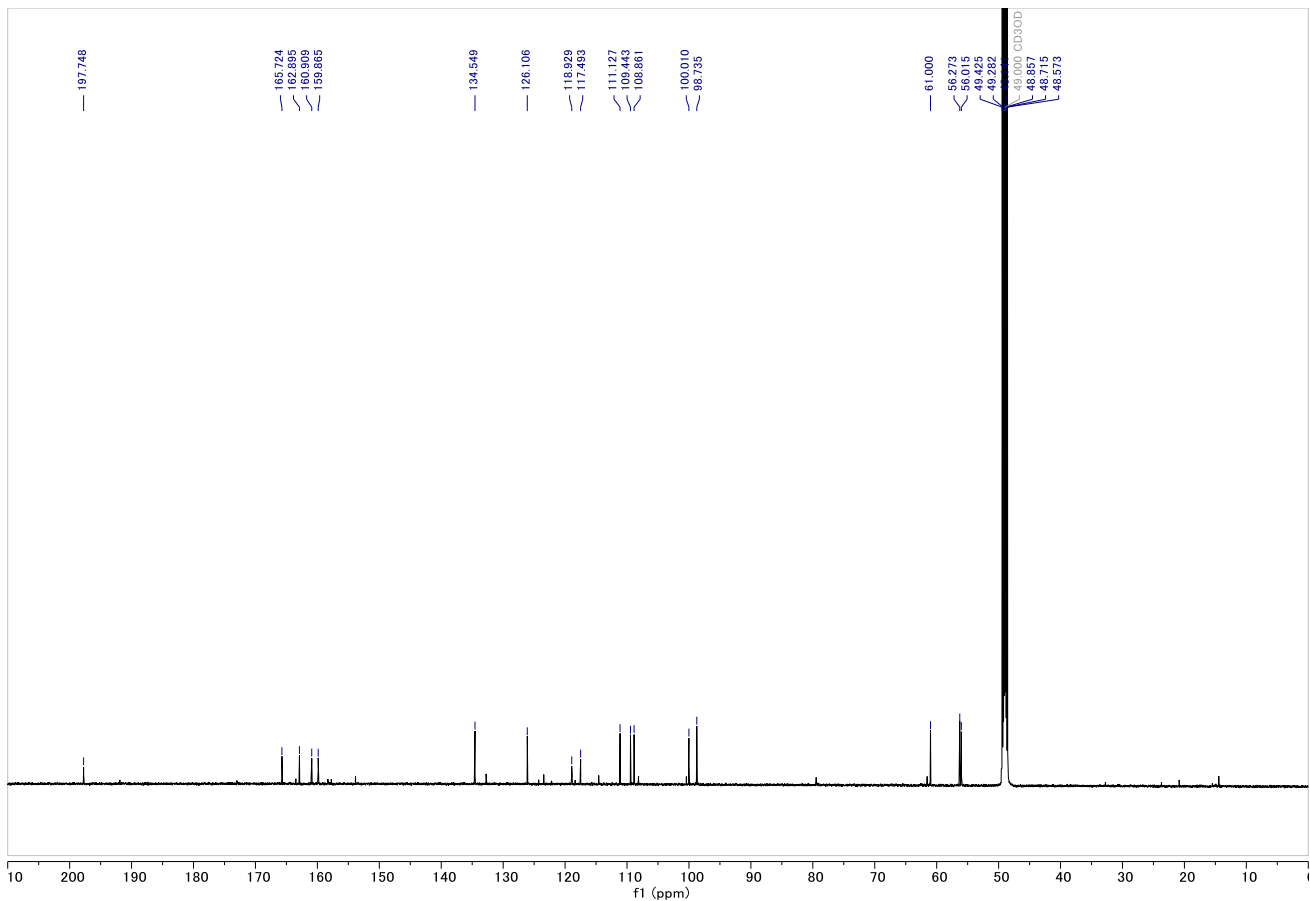

# <sup>1</sup>H NMR Puerariafuran

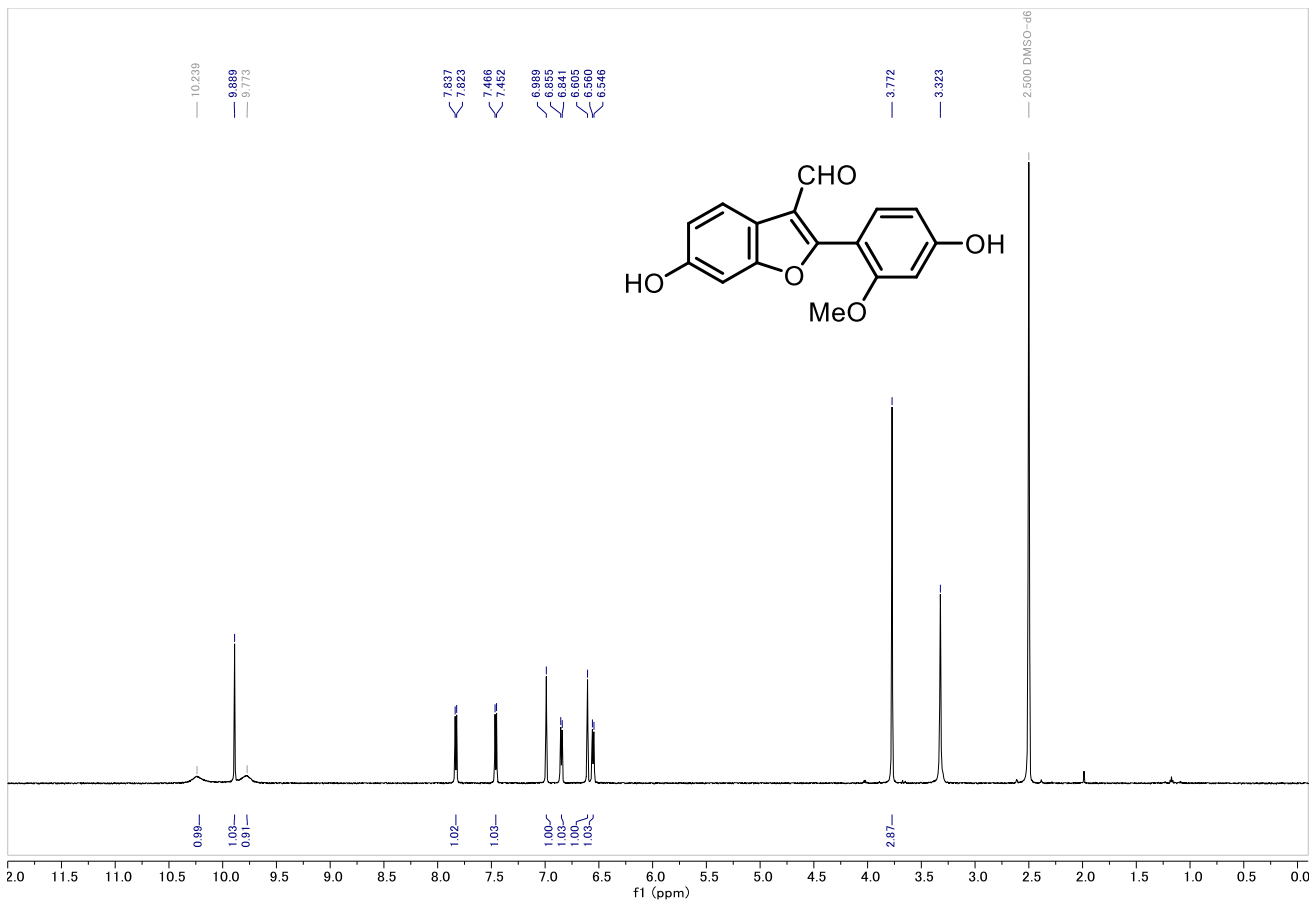

# <sup>13</sup>C NMR Puerariafuran

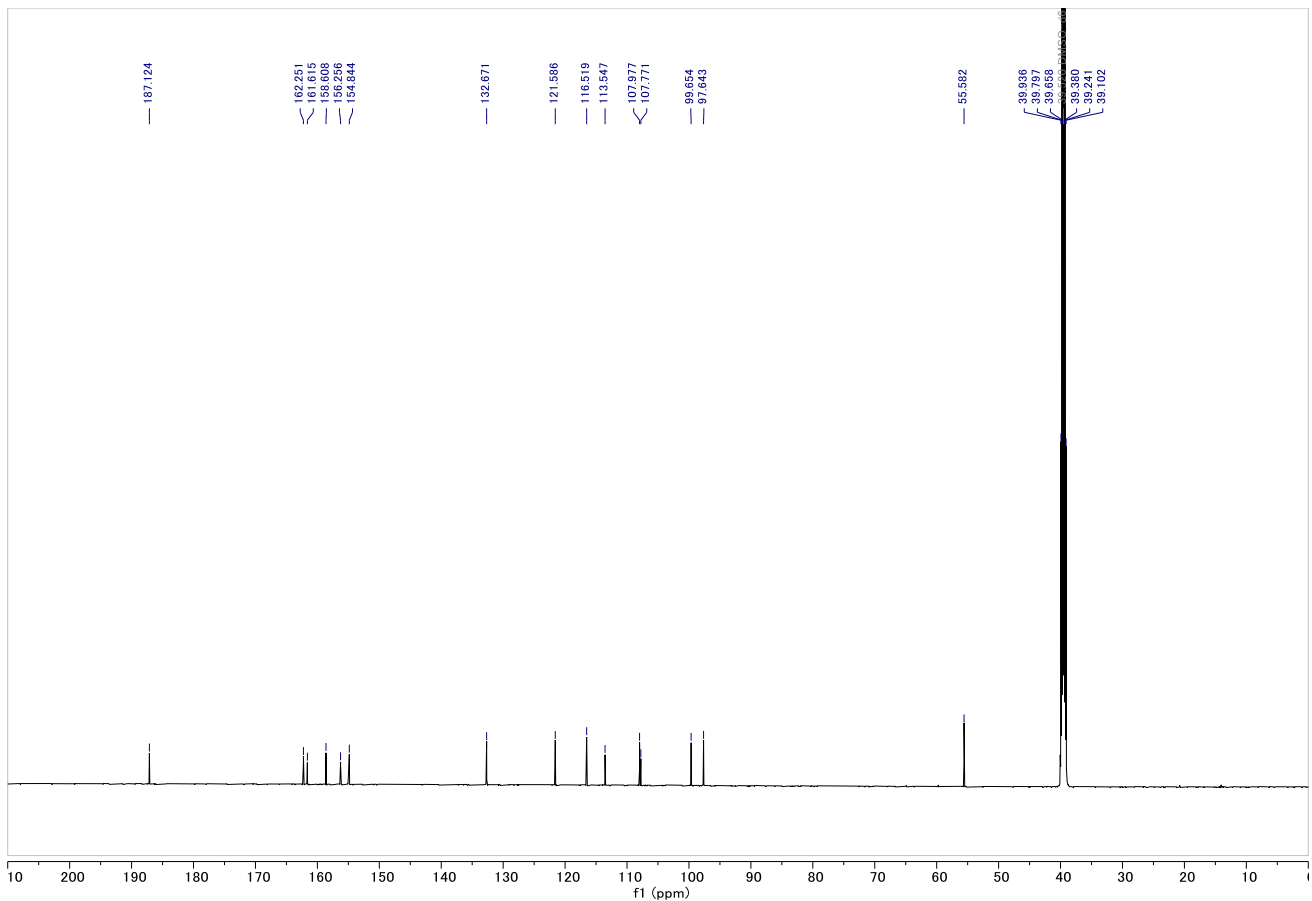

## HRMS (FAB) 1a

OMe Chalcone

Page: 1

[ Elemental Composition ]  
 Data : K.Sakaida-12-1-001  
 Sample: -  
 Note : -  
 Inlet : Direct  
 RT : 0.60 min  
 Elements : C 20/0, H 20/0, O 5/0  
 Mass Tolerance : 5mmu  
 Unsaturation (U.S.) : -0.5 - 15.0

Date : 02-May-2017 16:42

Ion Mode : FAB+  
 Scan#: (3,5)

| Observed m/z | Int% | Err [ppm / mmu] | U.S. | Composition   |
|--------------|------|-----------------|------|---------------|
| 298.1212     | 8.1  | +2.3 / +0.7     | 10.0 | C 18 H 18 O 4 |
| 237.0928     | 28.5 | +5.2 / +1.2     | 10.5 | C 16 H 13 O 2 |

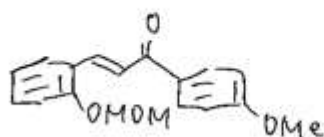

## HRMS (FAB) 1b

Page: 1

[ Elemental Composition ]  
 Data : K.Sakaida-9-2-001  
 Sample: -  
 Note : -  
 Inlet : Direct  
 RT : 0.40 min  
 Elements : C 20/0, H 20/0, O 5/0  
 Mass Tolerance : 5mmu  
 Unsaturation (U.S.) : -0.5 - 10.0

Date : 02-May-2017 15:42

Ion Mode : FAB+  
 Scan#: (2,4)

| Observed m/z | Int%  | Err [ppm / mmu] | U.S. | Composition   |
|--------------|-------|-----------------|------|---------------|
| 282.1255     | 12.1  | -0.4 / -0.1     | 10.0 | C 18 H 18 O 3 |
| 283.1357     | 100.0 | +7.9 / +2.2     | 9.5  | C 18 H 19 O 3 |
| 284.1396     | 20.7  | -5.6 / -1.6     | 9.0  | C 18 H 20 O 3 |

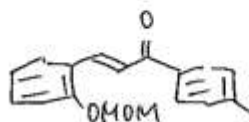

HRMS (FAB) 1c

[ Elemental Composition ]

Data : Cl-chalcone006

Date : 11-Apr-2017 18:14

Sample: sakaida

Note : -

Inlet : Direct

Ion Mode : FAB+

RT : 0.59 min

Scan#: (3,6)

Elements : C 20/10, H 20/10, O 5/0, Cl 1/0(35Cl 1/0, 37Cl 1/0)

Mass Tolerance : 1000ppm, 3mmu if m/z < 3, 50mmu if m/z > 50

Unsaturation (U.S.) : -0.5 - 15.0

Page: 1

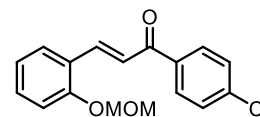

| Observed m/z   | Int%  | Err [ppm / mmu] | U.S. | Composition        |      |               |
|----------------|-------|-----------------|------|--------------------|------|---------------|
| 303.0813       | 100.0 | -68.7 / -20.8   | 13.5 | C 20 H 15 O 3      |      |               |
|                |       | +51.4 / +15.6   | 14.5 | C 19 H 11 O 4      |      |               |
|                |       | -138.4 / -42.0  | 8.5  | C 17 H 19 O 5      |      |               |
|                |       | +78.0 / +23.6   | 14.5 | C 20 H 12 O 35Cl   |      |               |
|                |       | -111.8 / -33.9  | 8.5  | C 18 H 20 O 2 35Cl |      |               |
|                |       | +8.3 / +2.5     | 9.5  | C 17 H 16 O 3 35Cl |      |               |
|                |       | +128.3 / +38.9  | 10.5 | C 16 H 12 O 4 35Cl |      |               |
|                |       | -61.5 / -18.6   | 4.5  | C 14 H 20 O 5 35Cl |      |               |
|                |       | -50.4 / -15.3   | 9.5  | C 18 H 18 O 2 37Cl |      |               |
|                |       | +69.6 / +21.1   | 10.5 | C 17 H 14 O 3 37Cl |      |               |
|                |       | -0.1 / +0.0     | 5.5  | C 14 H 18 O 5 37Cl |      |               |
|                |       | 302.0735        | 8.8  | -68.9 / -20.8      | 14.0 | C 20 H 14 O 3 |
|                |       |                 |      | +51.6 / +15.6      | 15.0 | C 19 H 10 O 4 |
|                |       |                 |      | -138.8 / -41.9     | 9.0  | C 17 H 18 O 5 |
| +78.3 / +23.6  | 15.0  |                 |      | C 20 H 11 O 35Cl   |      |               |
| -112.1 / -33.9 | 9.0   |                 |      | C 18 H 19 O 2 35Cl |      |               |
| +8.3 / +2.5    | 10.0  |                 |      | C 17 H 15 O 3 35Cl |      |               |
| +128.8 / +38.9 | 11.0  |                 |      | C 16 H 11 O 4 35Cl |      |               |
| -61.6 / -18.6  | 5.0   |                 |      | C 14 H 19 O 5 35Cl |      |               |
| -50.6 / -15.3  | 10.0  |                 |      | C 18 H 17 O 2 37Cl |      |               |
| +69.9 / +21.1  | 11.0  |                 |      | C 17 H 13 O 3 37Cl |      |               |
| -0.1 / +0.0    | 6.0   |                 |      | C 14 H 17 O 5 37Cl |      |               |

HRMS (ESI) 1d

IKGM240 191001105609 #19-32 RT: 0.10-0.16 AV: 14 NL: 1.63E9  
T: FTMS + p ESI Full ms [150.0000-600.0000]

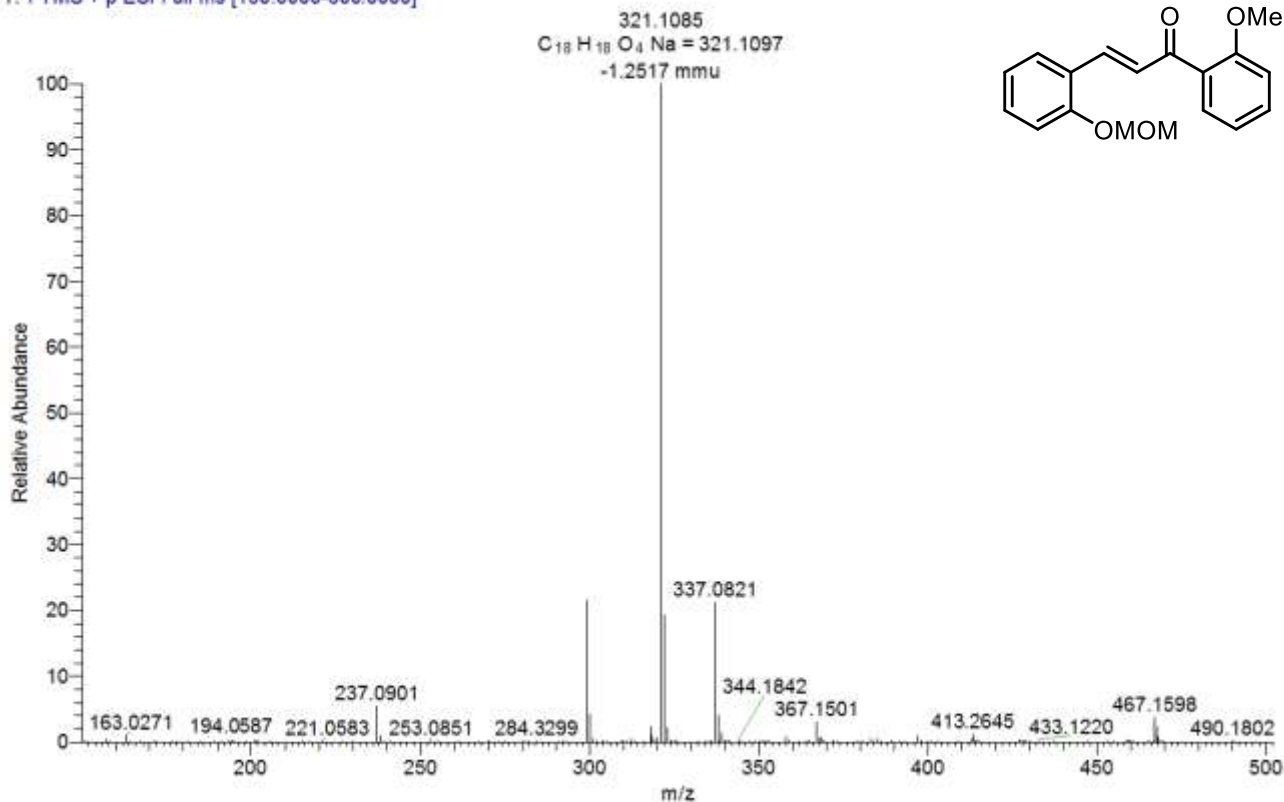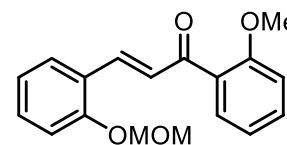



### HRMS (ESI) 1e

IKGM249#16-30 RT: 0.08-0.15 AV: 15 NL: 1.22E9  
T: FTMS + p ESI Full ms [150.0000-600.0000]

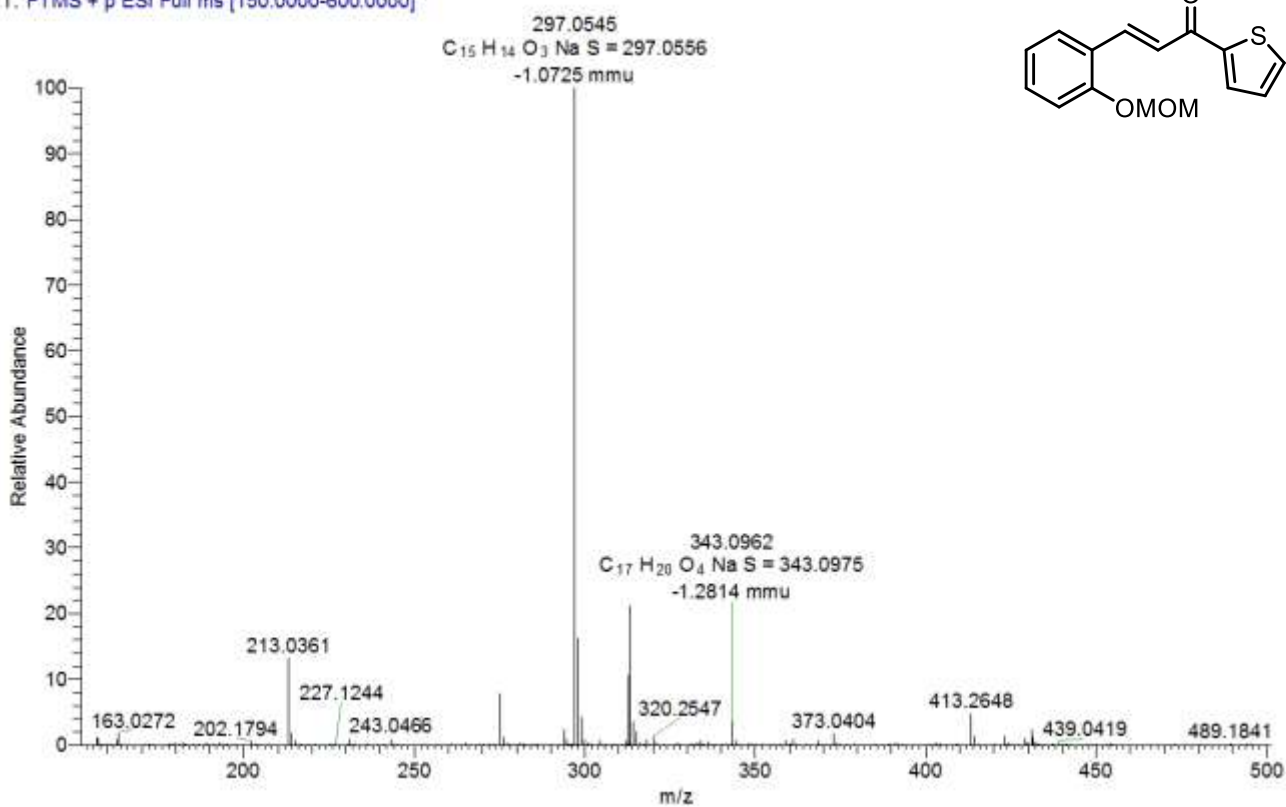

### HRMS (ESI) 1f

IKGM229#15-17 RT: 0.08-0.09 AV: 3 NL: 3.52E9  
T: FTMS + p ESI Full ms [120.0000-1800.0000]

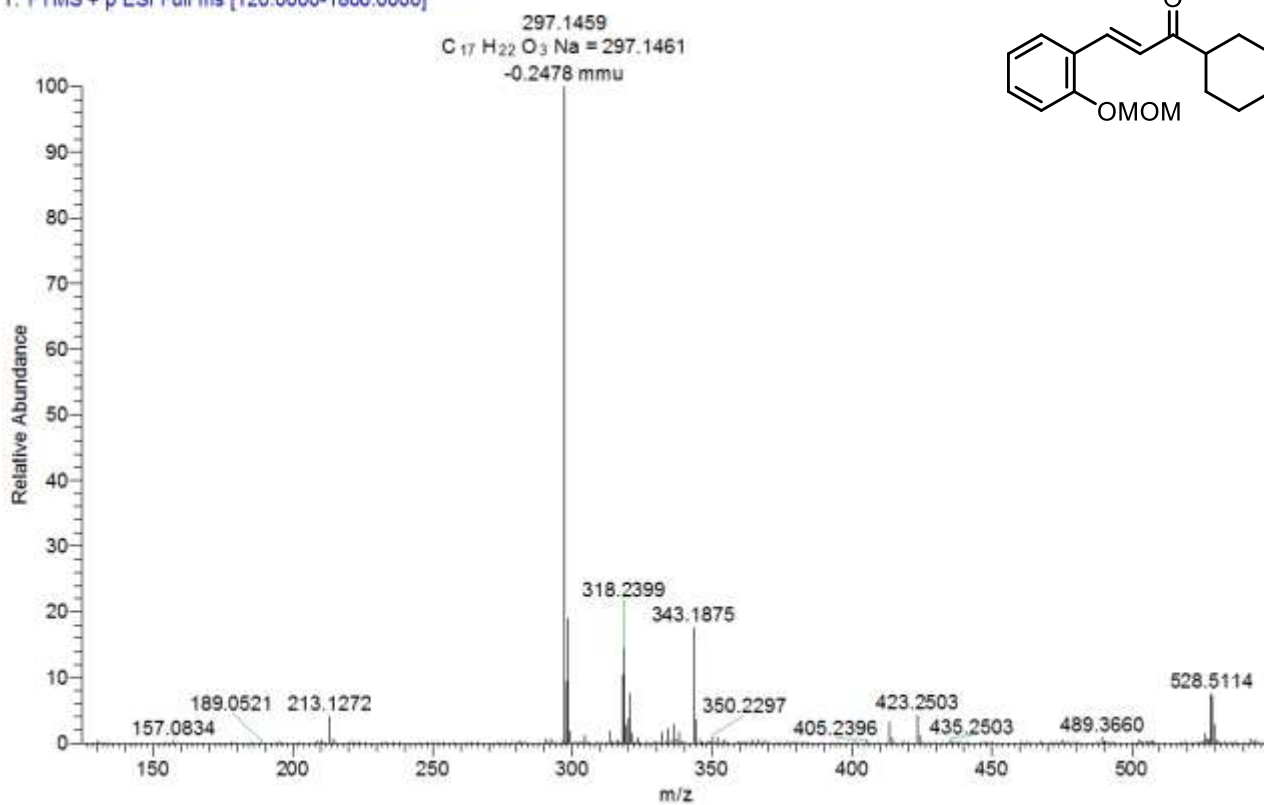

## HRMS (ESI) 1g

YGT\_66 #18 RT: 0.10 AV: 1 NL: 1.15E8  
T: FTMS + p ESI Full ms [150.0000-600.0000]

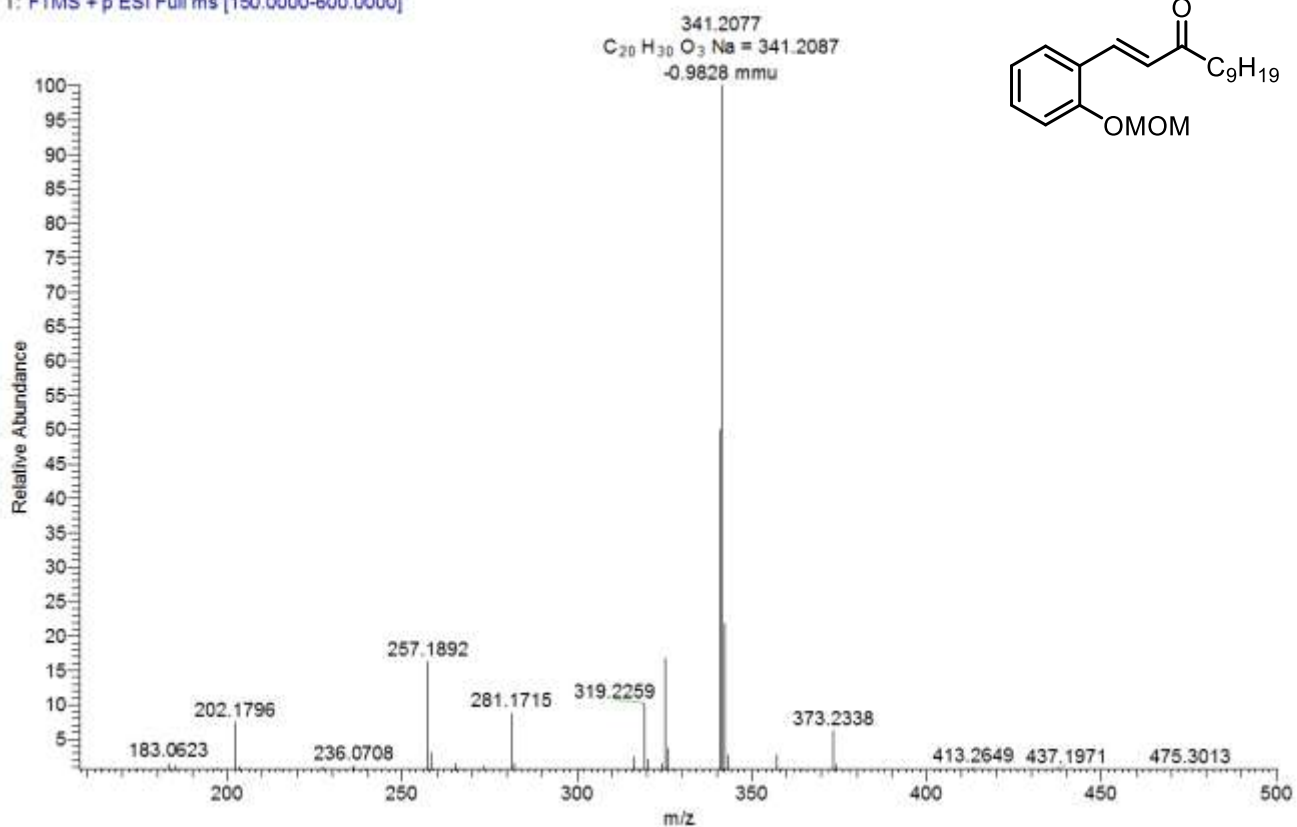

## HRMS (ESI) 2a

IKGM-4OMe-ten1 #29-33 RT: 0.15-0.17 AV: 5 NL: 1.06E9  
T: FTMS + p ESI Full ms [150.0000-600.0000]

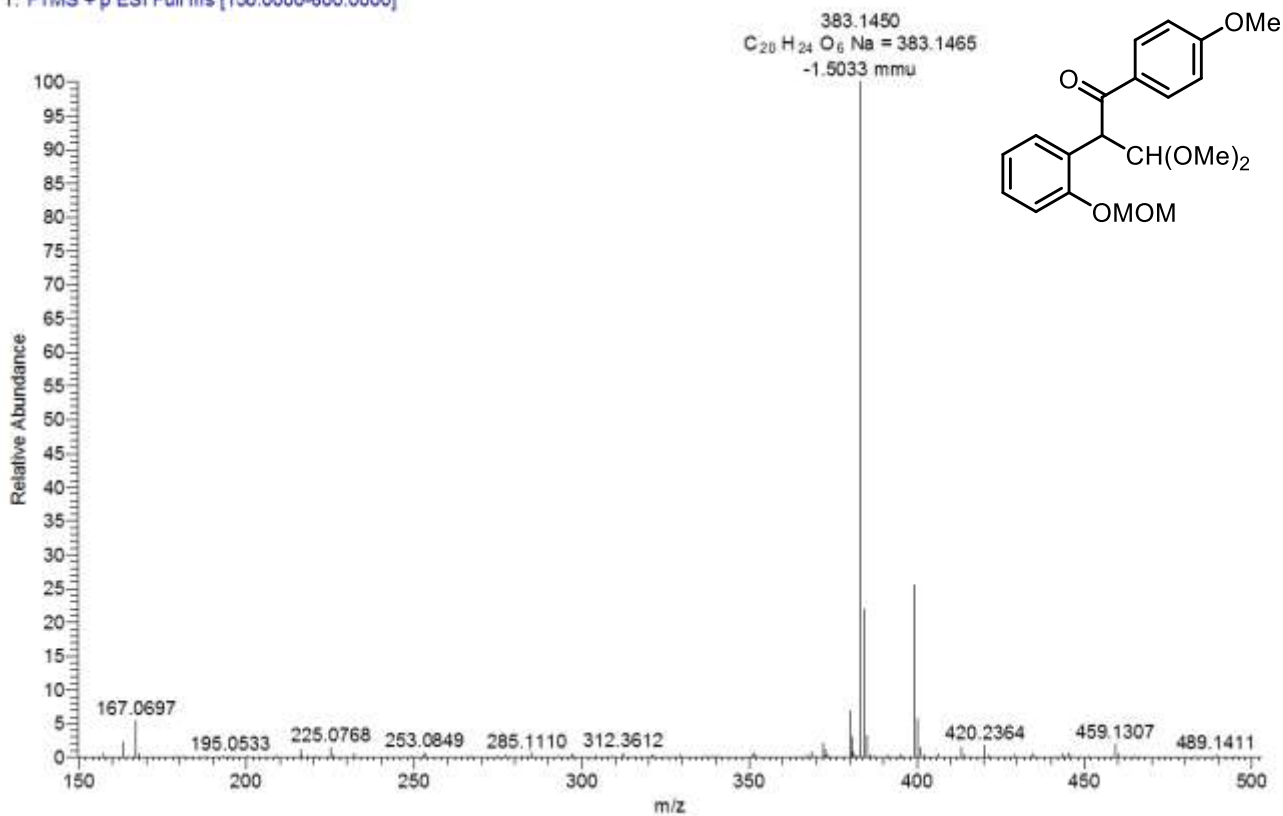

## HRMS (ESI) 2b

[KGM-Me-teni #11-15 RT: 0.08-0.10 AV: 5 NL: 2.68E8  
T: FTMS + p ESI Full ms [150.0000-600.0000]

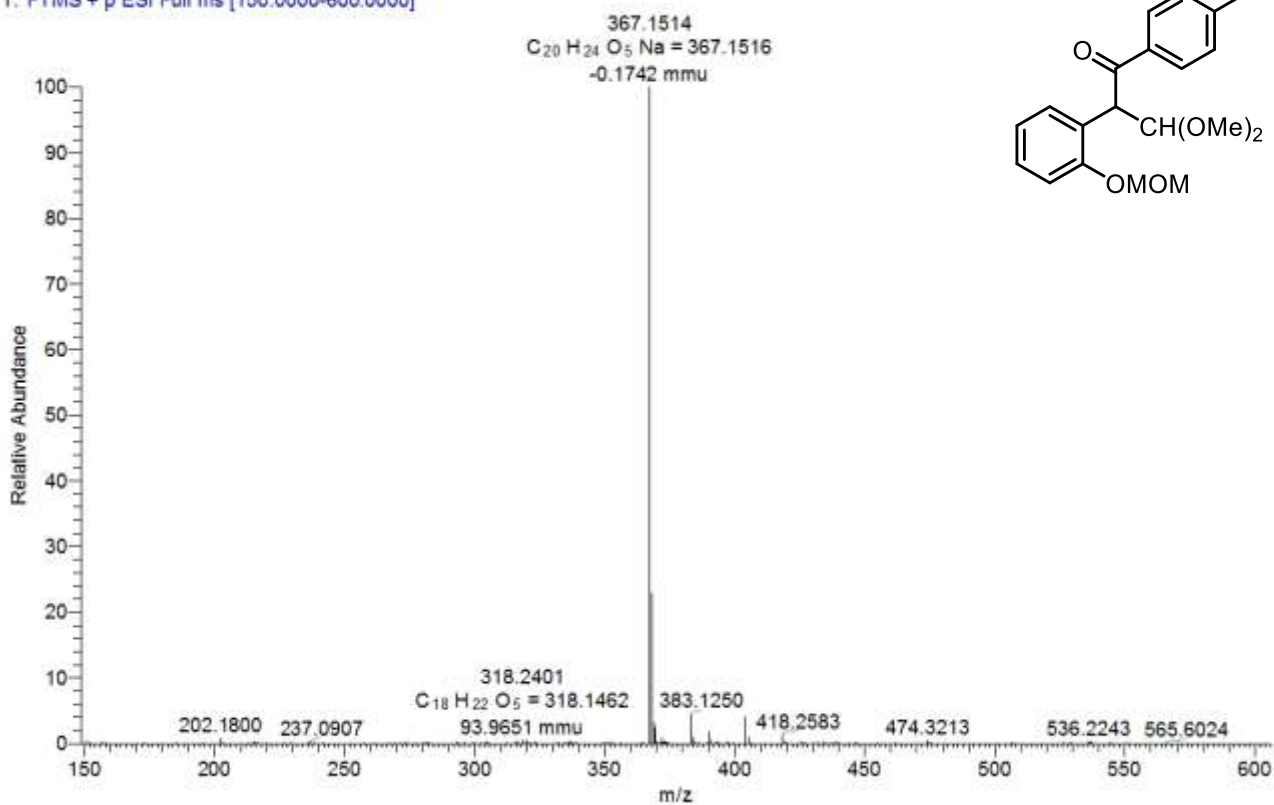

## HRMS (ESI) 2c

[KGM-Cl-teni #15-17 RT: 0.09-0.10 AV: 3 NL: 1.39E9  
T: FTMS + p ESI Full ms [150.0000-600.0000]

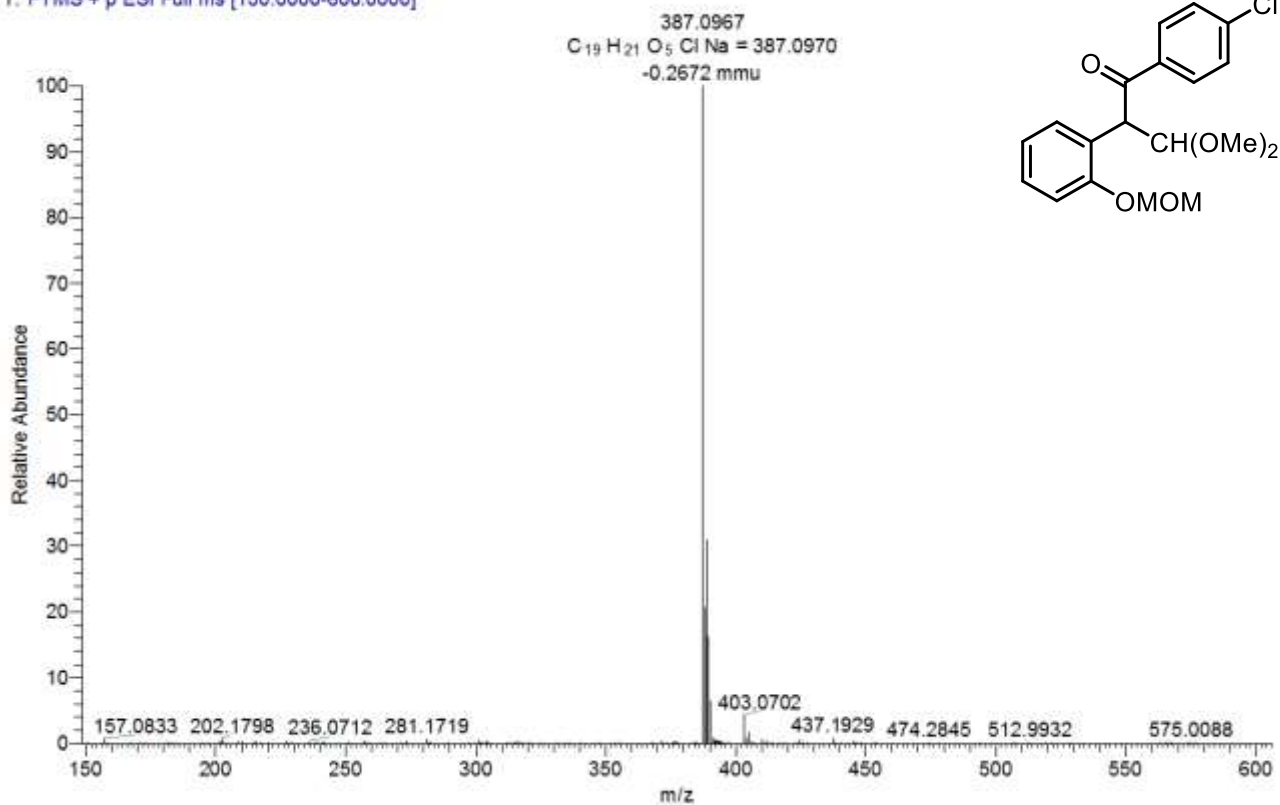

## HRMS (ESI) 2d

IKGM241\_191001105904 #29 RT: 0.15 AV: 1 NL: 1.39E9  
T: FTMS + p ESI Full ms [150.0000-600.0000]

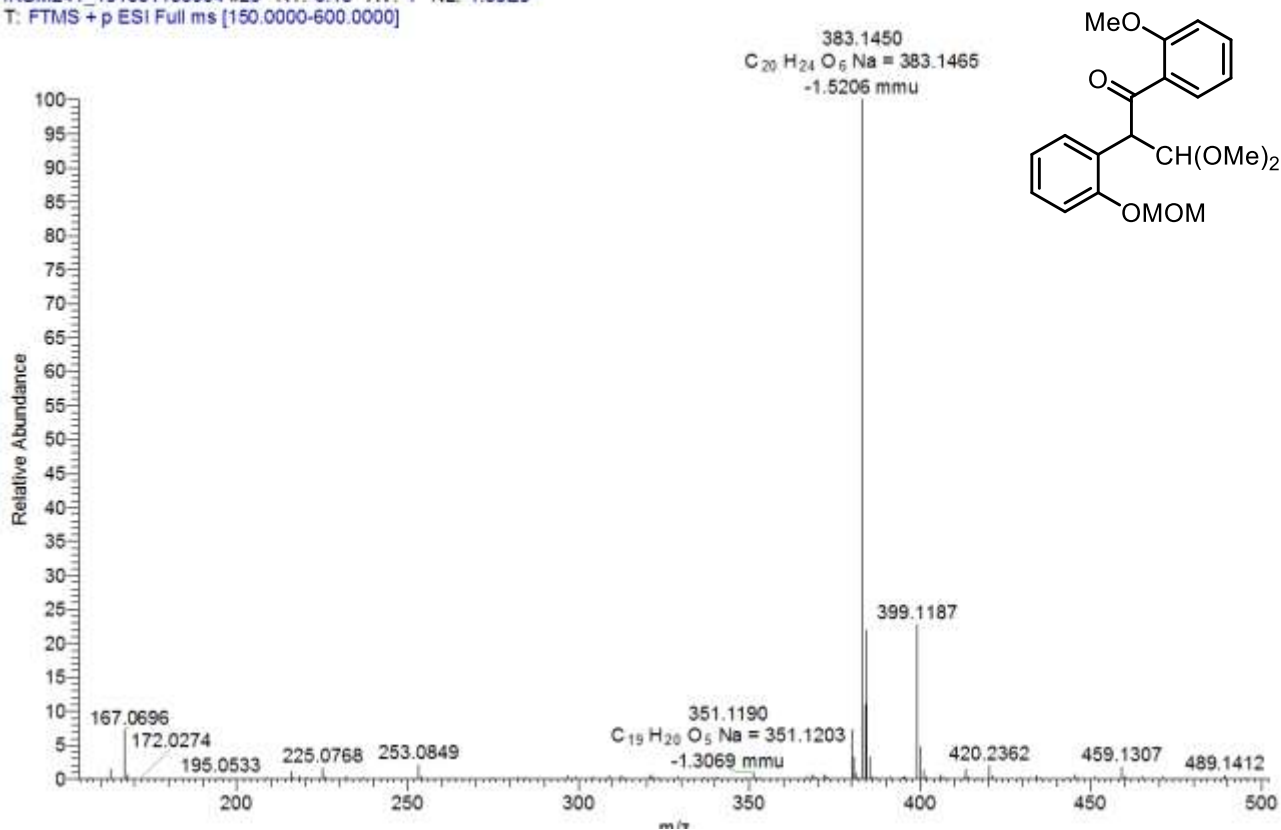

## HRMS (ESI) 2e

IKGM251 #20-26 RT: 0.10-0.13 AV: 7 NL: 1.35E9  
T: FTMS + p ESI Full ms [150.0000-600.0000]

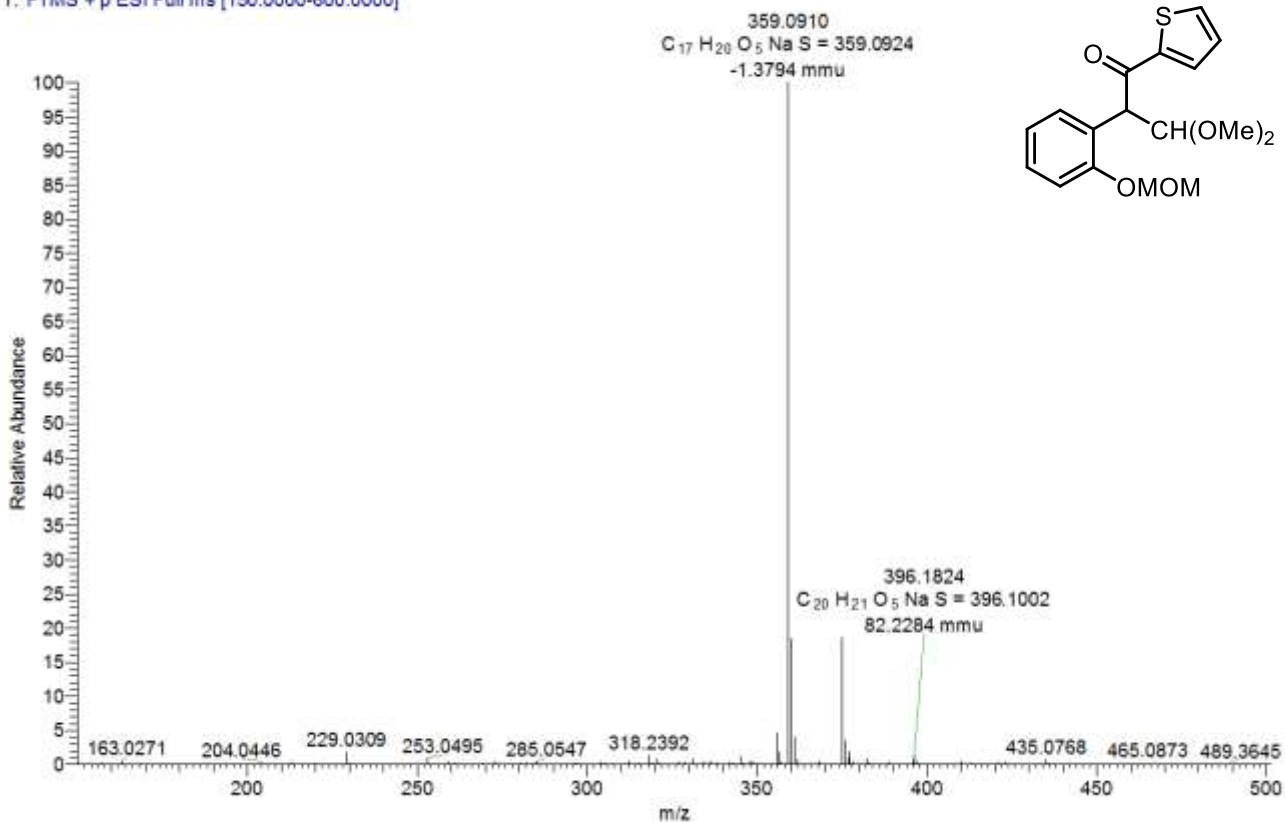

## HRMS (ESI) 2f

IKGM238 190621135456 #18 RT: 0.09 AV: 1 NL: 5.58E9  
T: FTMS + p ESI Full ms [120.0000-1800.0000]

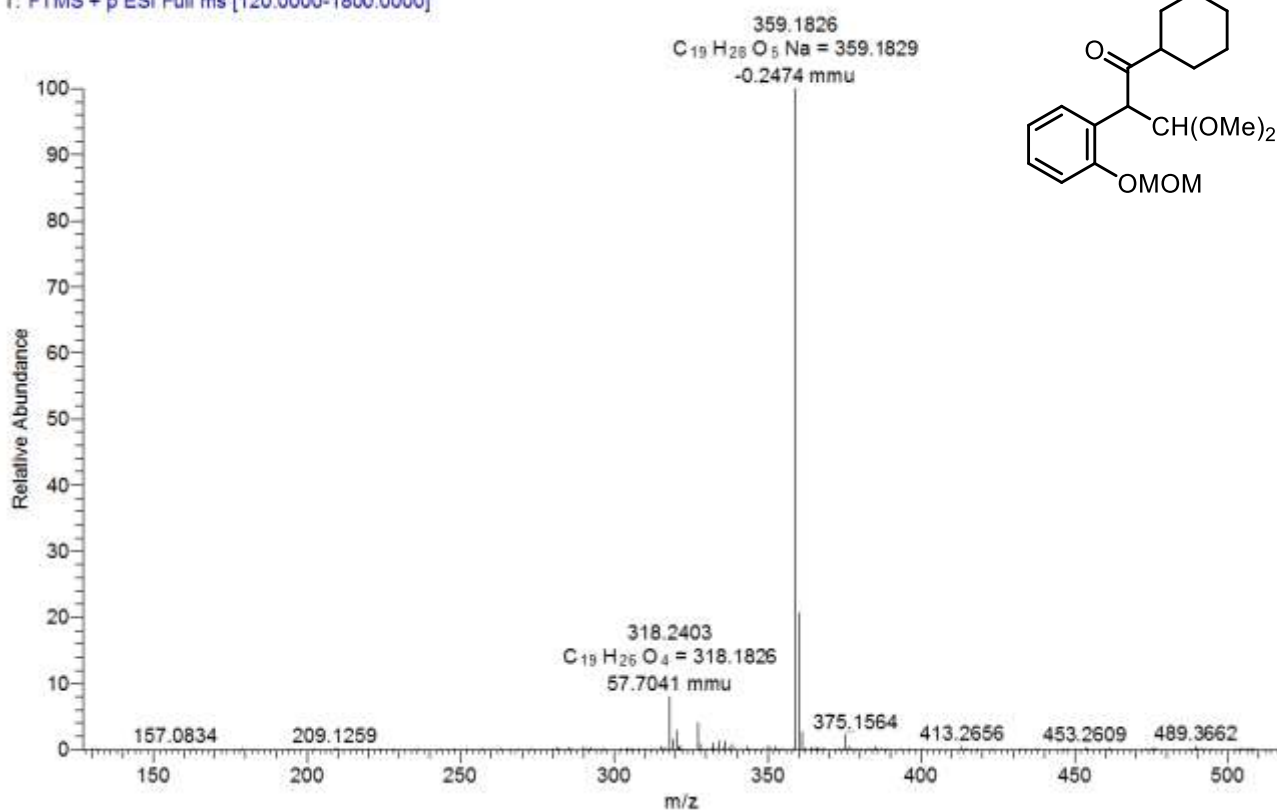

## HRMS (ESI) 2g

YGT\_67 #17 RT: 0.09 AV: 1 NL: 4.13E8  
T: FTMS + p ESI Full ms [150.0000-600.0000]

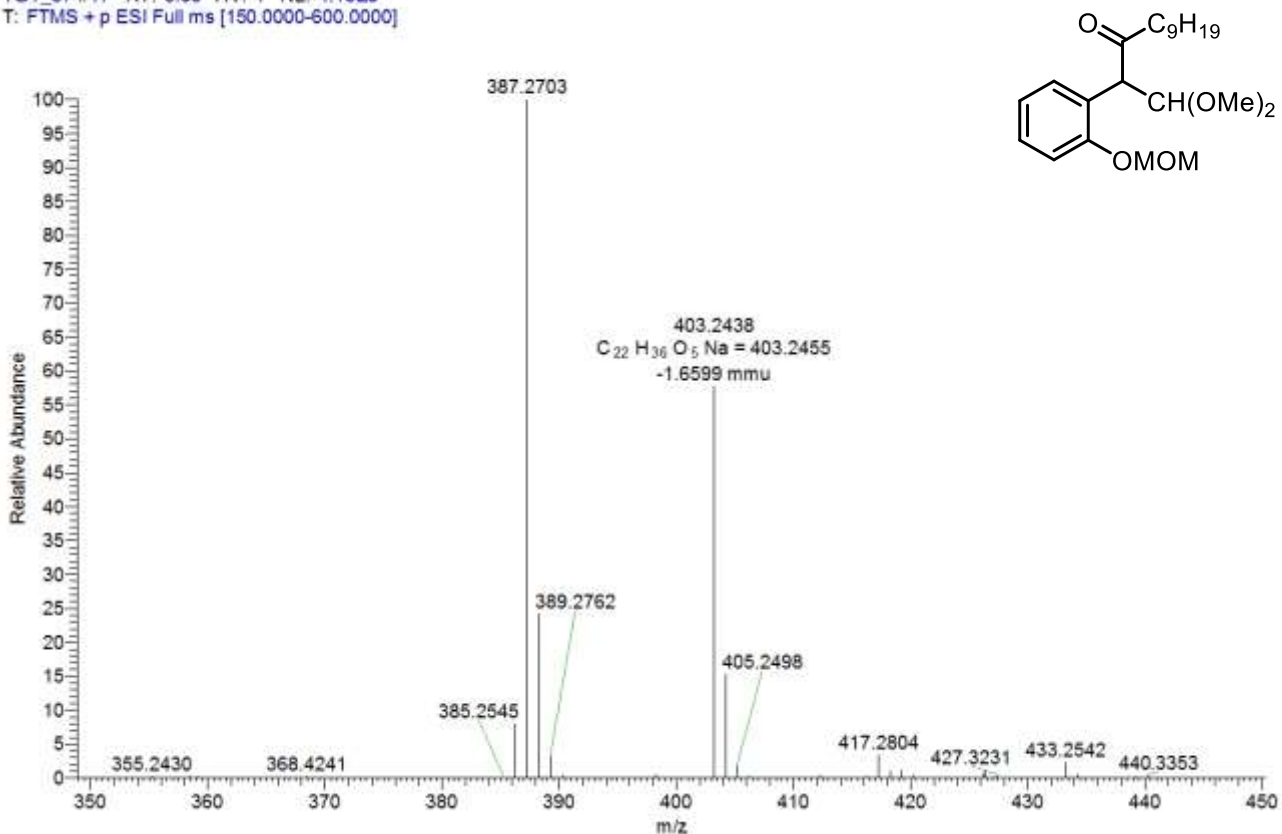

HRMS (FAB) 3a

Page: 1

[ Elemental Composition ]

Data : K.Sakaida-1-2-001

Date : 02-May-2017 14:39

Sample: -

Note : -

Inlet : Direct

Ion Mode : FAB+

RT : 0.50 min

Scan#: (3,4)

Elements : C 20/0, H 20/0, O 5/0

Mass Tolerance : 5mmu

Unsaturation (U.S.) : -0.5 - 10.0

| Observed m/z | Int%  | Err [ppm / mmu] | U.S. | Composition   |
|--------------|-------|-----------------|------|---------------|
| 290.0854     | 26.8  |                 |      |               |
| 289.0813     | 100.0 |                 |      |               |
| 285.1091     | 14.6  | -12.6 / -3.6    | 9.5  | C 17 H 17 O 4 |
| 284.1042     | 8.3   | -2.4 / -0.7     | 10.0 | C 17 H 16 O 4 |

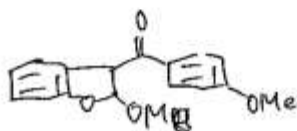

HRMS (FAB) 3b

Page: 1

[ Elemental Composition ]

Data : K.Sakaida-10-2-001

Date : 02-May-2017 15:52

Sample: -

Note : -

Inlet : Direct

Ion Mode : FAB+

RT : 0.40 min

Scan#: (2,4)

Elements : C 20/0, H 20/0, O 5/0

Mass Tolerance : 5mmu

Unsaturation (U.S.) : -0.5 - 10.0

| Observed m/z | Int%  | Err [ppm / mmu] | U.S. | Composition   |
|--------------|-------|-----------------|------|---------------|
| 267.1037     | 11.9  |                 |      |               |
| 268.1094     | 100.0 | -2.0 / -0.5     | 10.0 | C 17 H 16 O 3 |
| 269.1155     | 81.3  | -8.4 / -2.3     | 9.5  | C 17 H 17 O 3 |
| 270.1195     | 16.7  |                 |      |               |

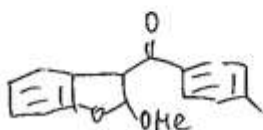

HRMS (FAB) 3c

[ Elemental Composition ]

Data : K.Sakaida-02-001

Date : 28-Apr-2017 14:20

Page: 1

Sample: -

Note: -

Inlet : Direct

Ion Mode : FAB+

RT : 0.09 min

Scan#: (1,2)

Elements : C 20/0, H 20/0, O 5/0, Cl 1/0 (35Cl 1/0, 37Cl 1/0)

Mass Tolerance : 5mmu

Unsaturation (U.S.) : -0.5 - 10.0

| Observed m/z        | Int%  | Err [ppm / mmu]         | U.S. | Composition                   |
|---------------------|-------|-------------------------|------|-------------------------------|
| 291.0621            | 25.5  | +6.4 / +1.9             | 9.5  | C 16 H 14 O 3 37Cl            |
| <del>290.0553</del> | 40.6  | <del>+10.1 / +2.9</del> | 10.0 | <del>C 16 H 13 O 3 37Cl</del> |
| 289.0703            | 94.5  | +15.8 / +4.6            | 5.5  | C 13 H 16 O 5 37Cl            |
| <del>288.0567</del> | 100.0 | <del>+4.7 / +1.3</del>  | 10.0 | <del>C 16 H 13 O 3 35Cl</del> |
|                     |       | <del>-4.1 / -1.2</del>  | 6.0  | <del>C 13 H 15 O 5 37Cl</del> |
| 287.0501            | 8.3   | +0.4 / +0.1             | 6.5  | C 13 H 14 O 5 37Cl            |

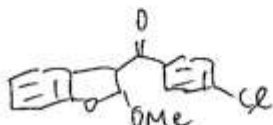

HRMS (ESI) 3d

IKGM-o-OMe-dihydro #15-18 RT: 0.09-0.10 AV: 4 NL: 1.64E9  
T: FTMS + p ESI Full ms [150.0000-600.0000]

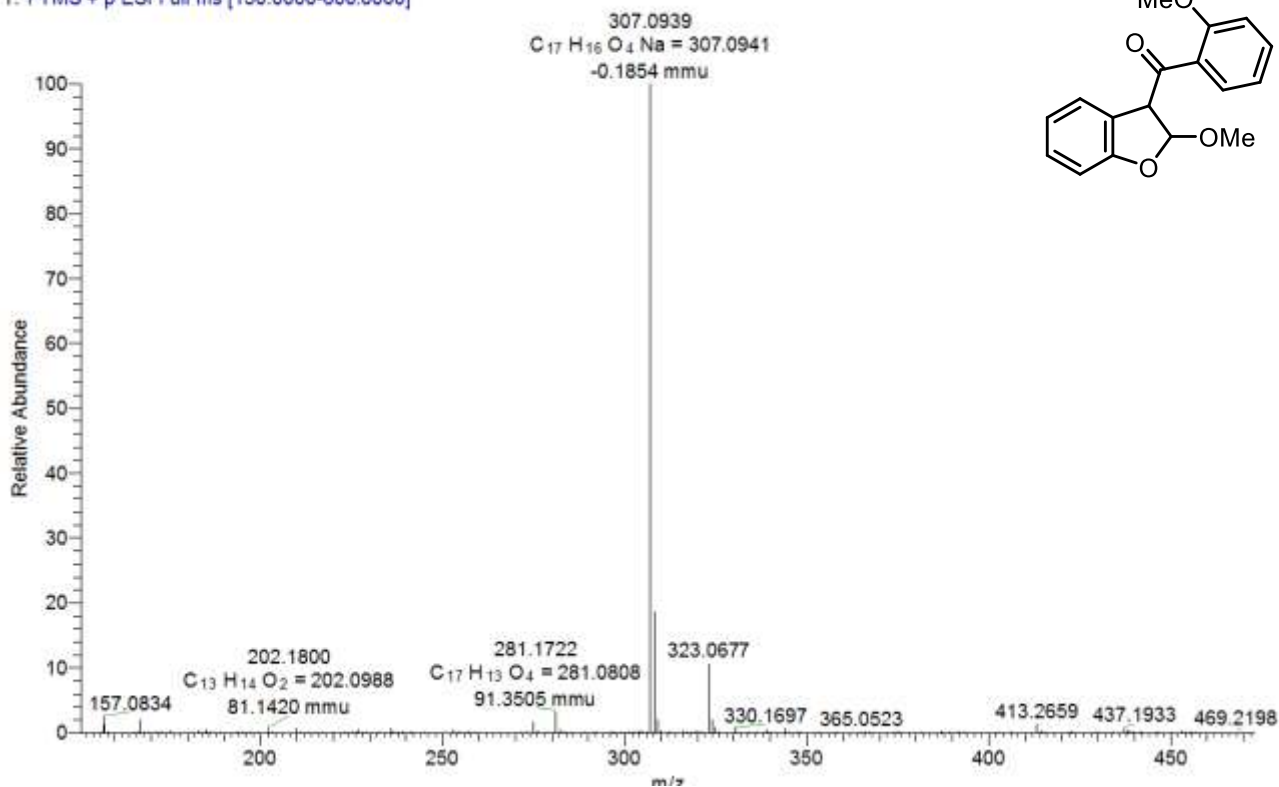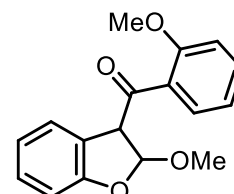

HRMS (FAB) 3e

[ Elemental Composition ]

Data : K.Sakaida-04-001

Date : 28-Apr-2017 15:09

Sample: -

Note : -

Inlet : Direct

Ion Mode : FAB+

RT : 0.09 min

Scan#: (1,2)

Elements : C 20/0, H 20/0, O 5/0, S 1/0

Mass Tolerance : 5mmu

Unsaturation (U.S.) : -0.5 - 10.0

| Observed m/z | Int%  | Err [ppm / mmu] | U.S. | Composition     |
|--------------|-------|-----------------|------|-----------------|
| 260.0481     | 100.0 | -10.2 / -2.7    | 10.0 | C 14 H 12 O 3 S |
| 261.0546     | 91.0  | -15.0 / -3.9    | 9.5  | C 14 H 13 O 3 S |

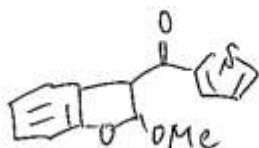

HRMS (ESI) 3f

IKGM239#17-20 RT: 0.09-0.11 AV: 4 NL: 7.54E8  
T: FTMS + p ESI Full ms [120.0000-1800.0000]

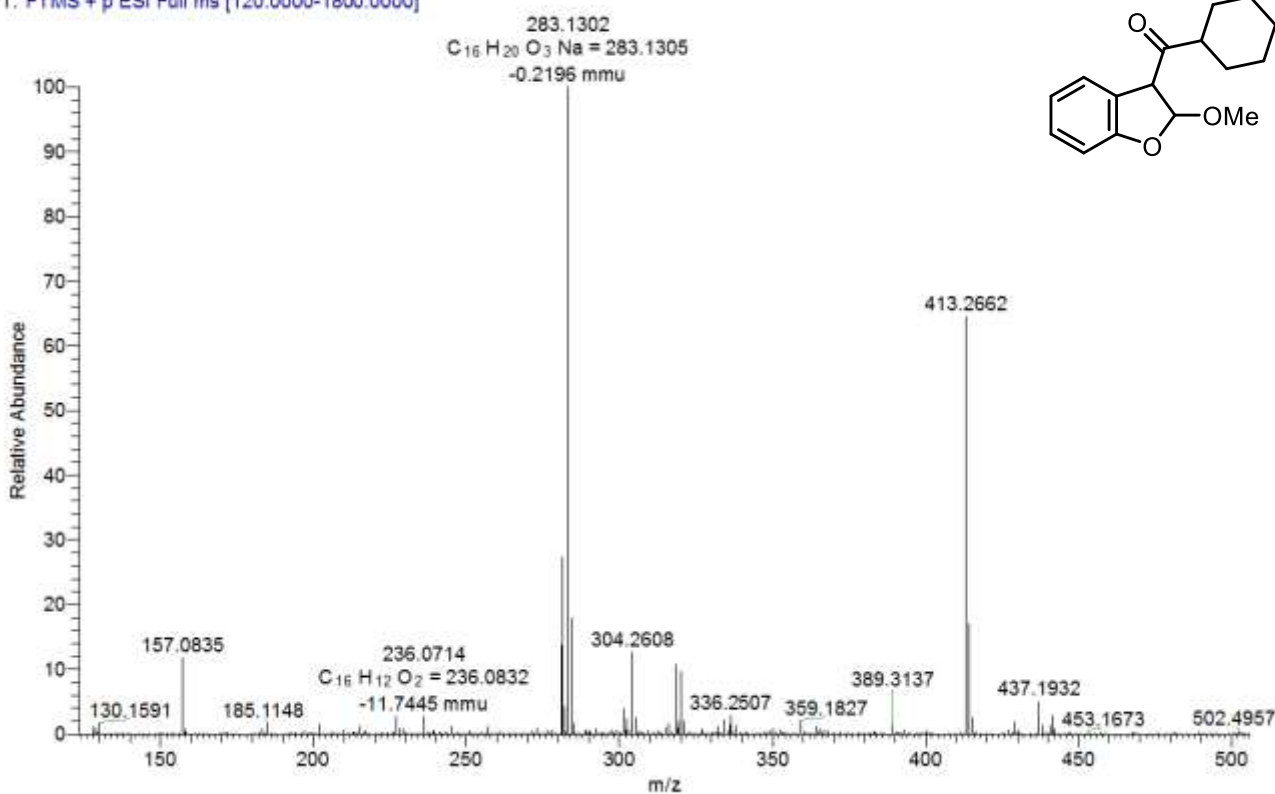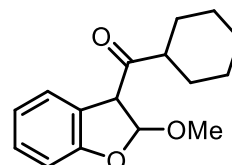



# HRMS (ESI) 3g

YGT\_68 #23 RT: 0.13 AV: 1 NL: 6.02E6  
T: FTMS + p ESI Full ms [150.0000-600.0000]

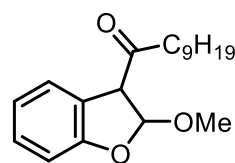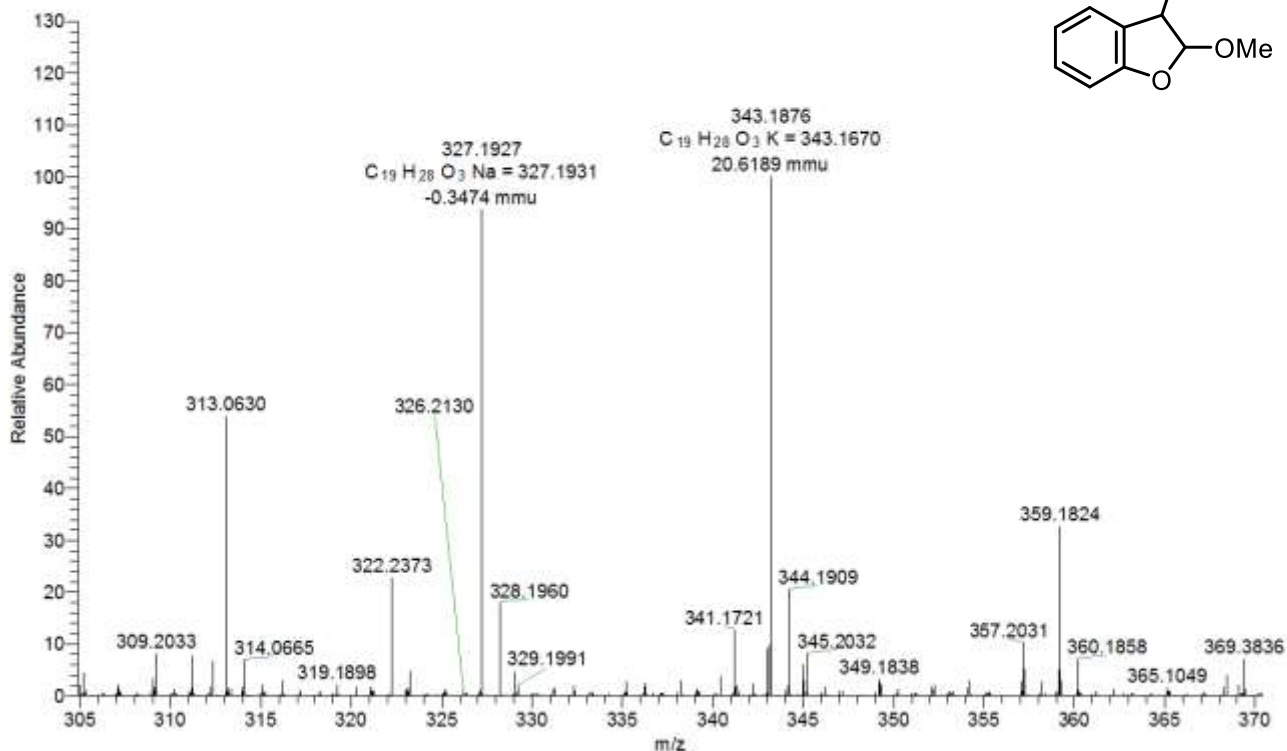

# HRMS (FAB) 4a

[ Elemental Composition ]

Data : AI-benzofuran-isomer-001

Date : 25-Jan-2017 11:14

Page: 1

Sample: AI-145-F2-HRMS

Note : -

Inlet : Direct

Ion Mode : FAB+

RT : 0.17 min

Scan#: (1,3)

Elements : C 20/0, H 15/0, O 5/0

Mass Tolerance : 1000ppm, 5mmu if m/z > 5

Unsaturation (U.S.) : -0.5 - 20.0

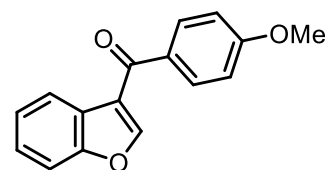

| Observed m/z | Int%  | Err [ppm / mmu] | U.S. | Composition   |
|--------------|-------|-----------------|------|---------------|
| 252.0815     | 36.6  | +11.4 / +2.9    | 11.0 | C 16 H 12 O 3 |
| 253.0862     | 100.0 | -1.1 / -0.3     | 10.5 | C 16 H 13 O 3 |

HRMS (FAB) 4b

Page: 1

[ Elemental Composition ]  
 Data : K.Sakaida-11-3-001  
 Sample: -  
 Note : -  
 Inlet : Direct  
 RT : 0.10 min  
 Elements : C 20/0, H 15/0, O 5/0  
 Mass Tolerance : 5mmu  
 Unsaturation (U.S.) : -0.5 - 15.0

Date : 02-May-2017 16:29

Ion Mode : FAB+  
 Scan#: (1,2)

| Observed m/z | Int% | Err [ppm / mmu] | U.S. | Composition   |
|--------------|------|-----------------|------|---------------|
| 238.0941     | 7.3  |                 |      |               |
| 237.0910     | 38.5 | -2.2 / -0.5     | 10.5 | C 16 H 13 O 2 |
| 236.0834     | 13.4 | -1.4 / -0.3     | 11.0 | C 16 H 12 O 2 |

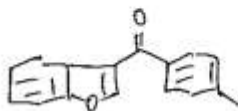

HRMS (FAB) 4c

Page: 1

[ Elemental Composition ]  
 Data : K.Sakaida-3-4-001  
 Sample: -  
 Note : -  
 Inlet : Direct  
 RT : 0.60 min  
 Elements : C 20/0, H 10/0, O 5/0, Cl 5/0 (35Cl 5/0, 37Cl 5/0)  
 Mass Tolerance : 5mmu  
 Unsaturation (U.S.) : -0.5 - 15.0

Date : 02-May-2017 16:16

Ion Mode : FAB+  
 Scan#: (3,5)

| Observed m/z | Int% | Err [ppm / mmu] | U.S. | Composition        |
|--------------|------|-----------------|------|--------------------|
| 256.0276     | 30.1 | -5.9 / -1.5     | 11.0 | C 15 H 9 O 2 35Cl  |
| 257.0349     | 80.4 | -7.9 / -2.0     | 10.5 | C 15 H 10 O 2 35Cl |
| 258.0369     | 19.4 |                 |      |                    |
| 259.0333     | 26.9 | +7.1 / +1.8     | 14.5 | C 18 H 8 35Cl      |
|              |      | -2.7 / -0.7     | 10.5 | C 15 H 10 O 2 37Cl |

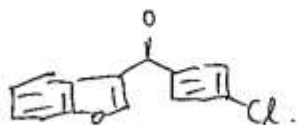

HRMS (ESI) 4d

IKGM243#16-25 RT: 0.08-0.13 AV: 10 NL: 7.46E8  
 T: FTMS + p ESI Full ms [150.0000-600.0000]

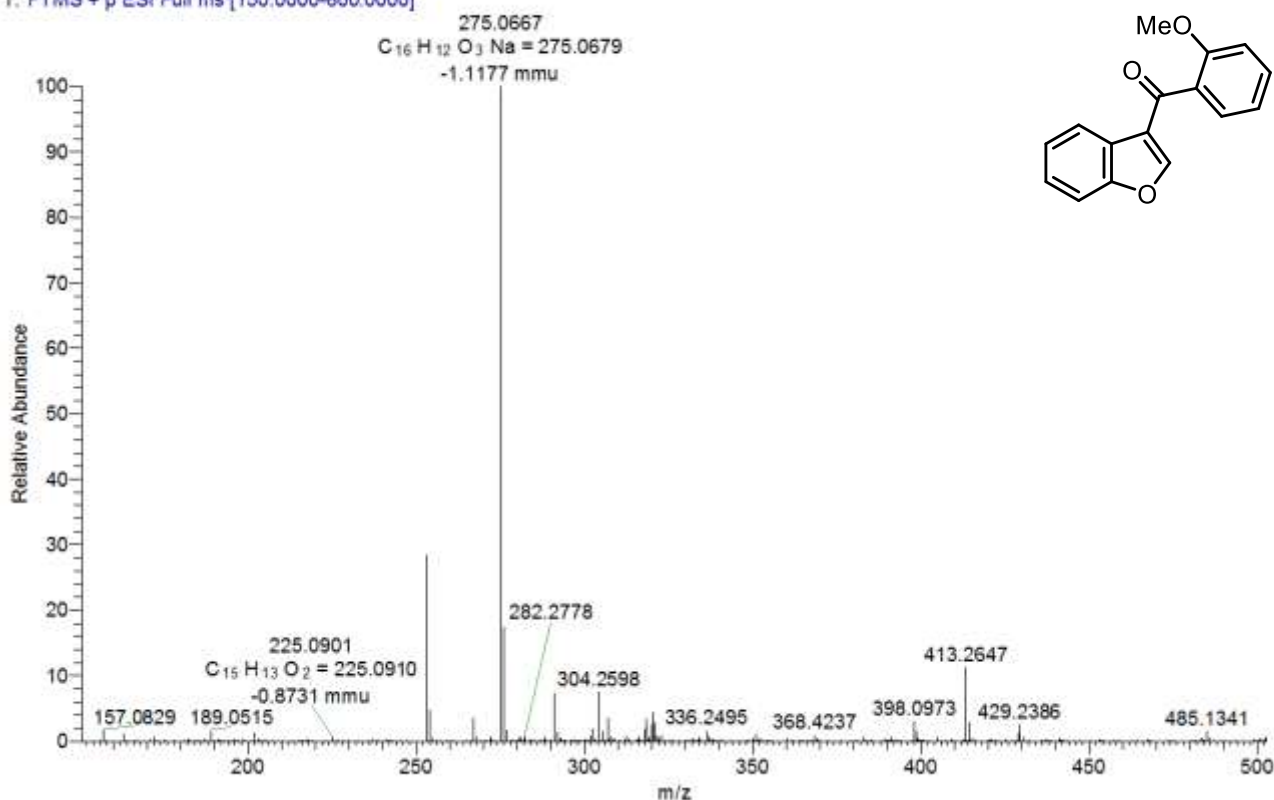

HRMS (FAB) 4e

[ Elemental Composition ]  
 Data : K.Sakaida-3-6-001  
 Sample: -  
 Note : -  
 Inlet : Direct  
 RT : 0.50 min  
 Elements : C 15/0, H 10/0, O 5/0, S 5/0  
 Mass Tolerance : 5mmu  
 Unsaturation (U.S.) : -0.5 - 15.0

Date : 06-May-2017 10:25

Page: 1

Ion Mode : FAB+  
 Scan#: (3,4)

| Observed m/z | Int% | Err [ppm / mmu] | U.S. | Composition    |
|--------------|------|-----------------|------|----------------|
| 230.0341     | 9.2  |                 |      |                |
| 229.0319     | 47.8 | -2.0 / -0.5     | 10.5 | C 13 H 9 O 2 S |
| 228.0244     | 20.1 | -0.2 / -0.1     | 11.0 | C 13 H 8 O 2 S |

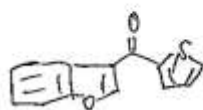

HRMS (FAB) 4f

[ Elemental Composition ]

Data : K.Sakaida-8-2-001

Sample: -

Note : -

Inlet : Direct

RT : 0.50 min

Elements : C 20/0, H 20/0, O 5/0

Mass Tolerance : 5mmu

Unsaturation (U.S.) : -0.5 - 10.0

Date : 02-May-2017 15:34

Ion Mode : FAB+

Scan#: (3,4)

Page: 1

| Observed m/z | Int%  | Err [ppm / mmu] | U.S. | Composition   |
|--------------|-------|-----------------|------|---------------|
| 230.1257     | 17.0  |                 |      |               |
| 229.1237     | 100.0 | +3.8 / +0.9     | 7.5  | C 15 H 17 O 2 |
| 228.1166     | 34.7  | +6.9 / +1.6     | 8.0  | C 15 H 16 O 2 |
| 227.1080     | 5.8   | +3.5 / +0.8     | 8.5  | C 15 H 15 O 2 |

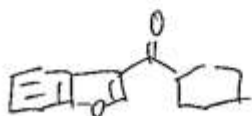

HRMS (ESI) 4g

YGT\_61acyl #27 RT: 0.15 AV: 1 NL: 3.19E7  
T: FTMS + p ESI Full ms [150.0000-600.0000]

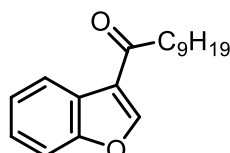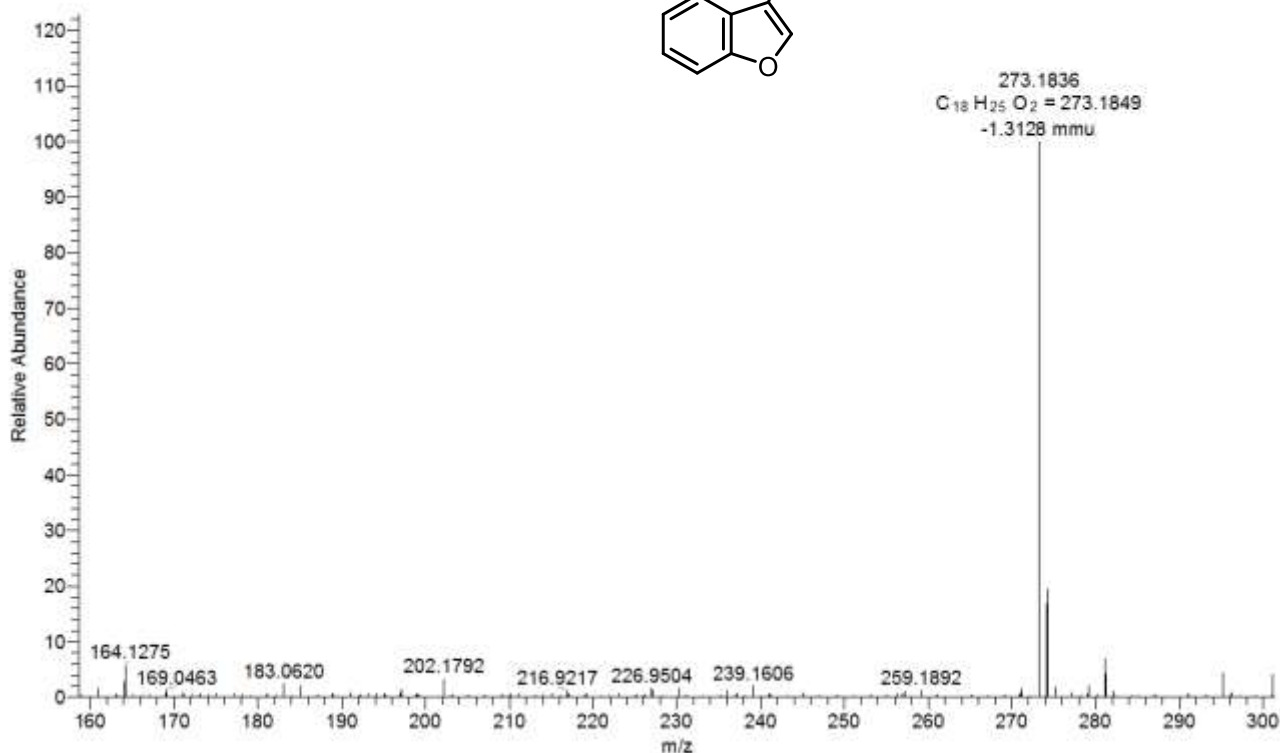

### HRMS (ESI) 5b

IKGM-Me-nitikan #14-17 RT: 0.09-0.10 AV: 4 NL: 5.20E7  
T: FTMS + p ESI Full ms [150.0000-600.0000]

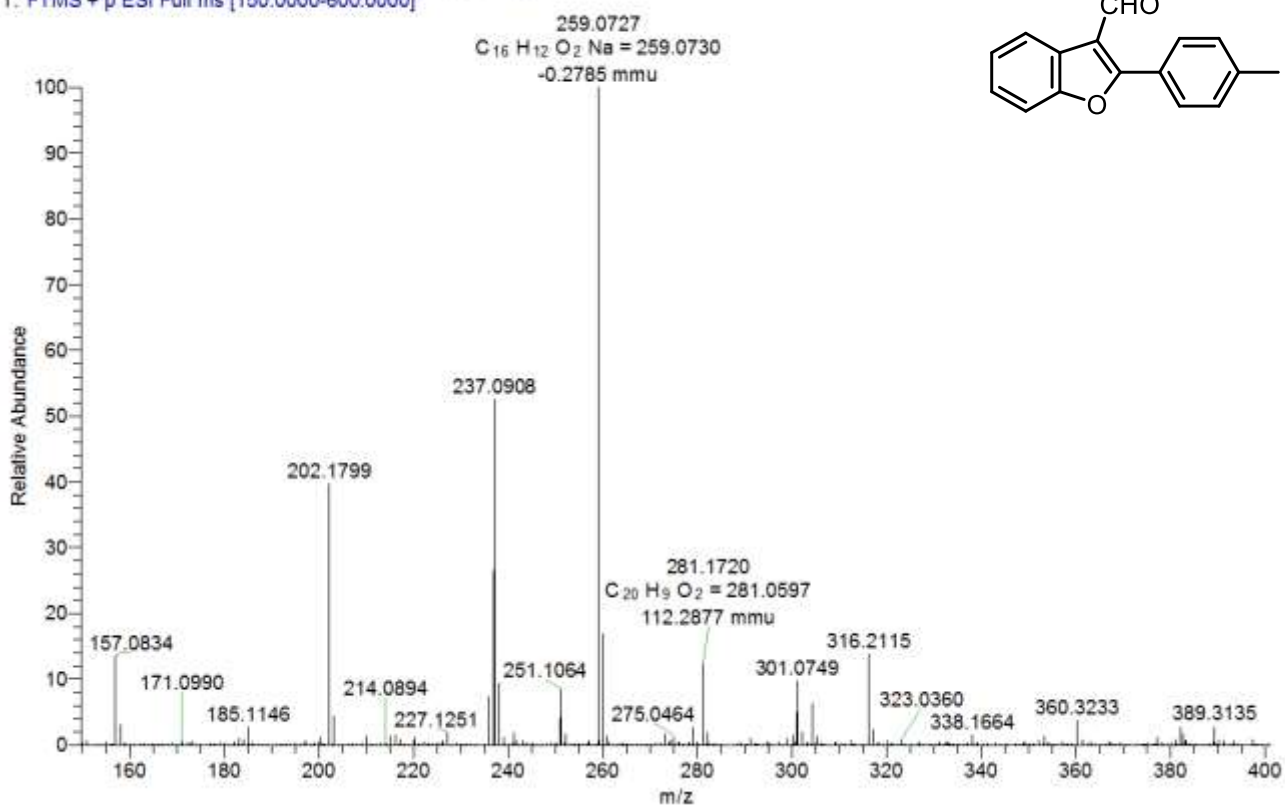

### HRMS (ESI) 5c

IKGM-Cl-nitikan #14-21 RT: 0.08-0.12 AV: 8 NL: 1.97E6  
T: FTMS + p ESI Full ms [150.0000-600.0000]

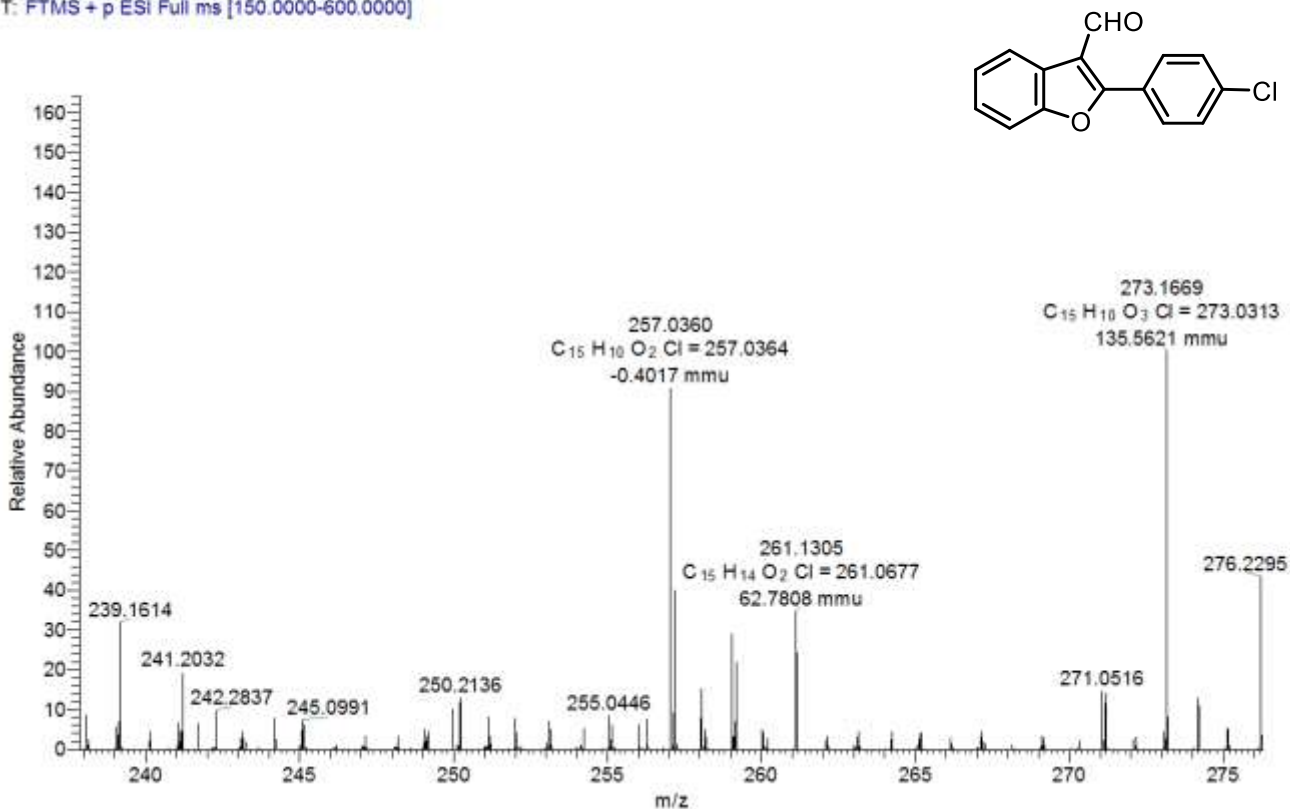

## HRMS (ESI) 5d

IKGM-OMe-nitikan #12-15 RT: 0.09-0.11 AV: 4 NL: 5.24E7  
T: FTMS + p ESI Full ms [150.0000-600.0000]

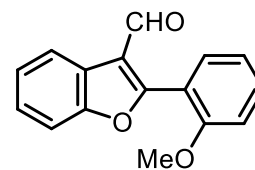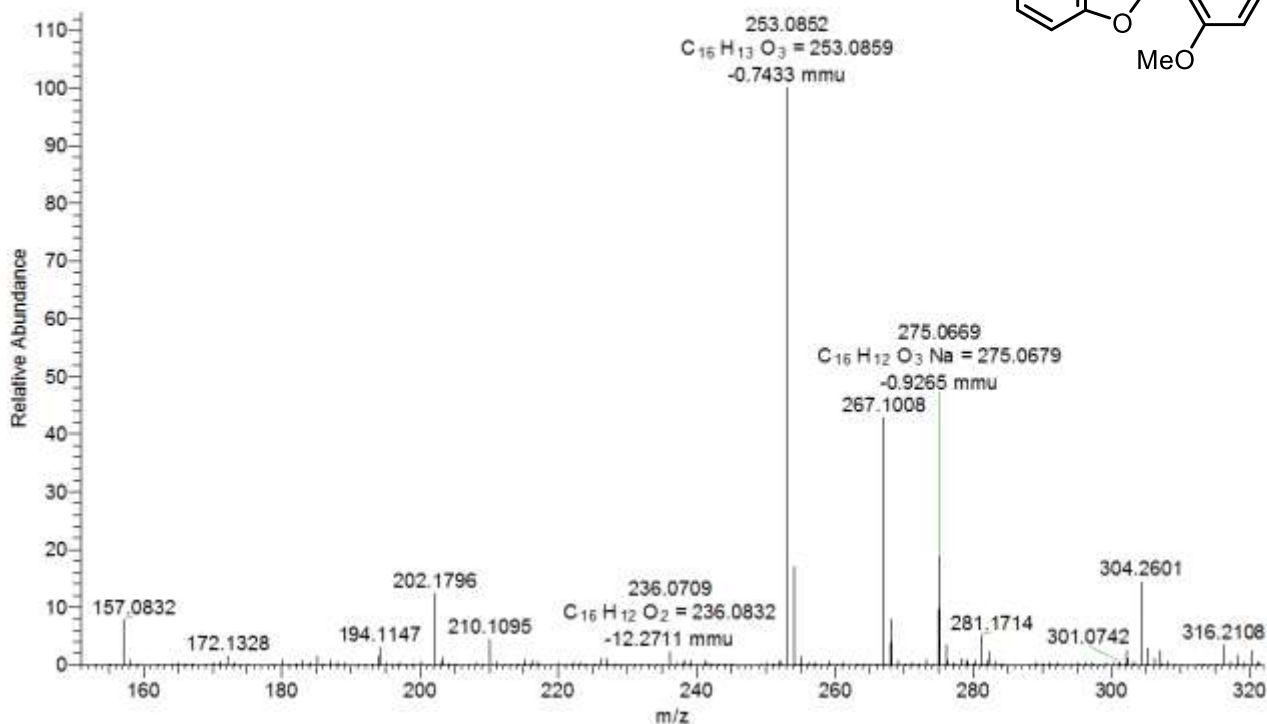

## HRMS (ESI) 5e

IKGM-tio-nitikan #10-12 RT: 0.08-0.10 AV: 3 NL: 2.03E5  
T: FTMS + p ESI Full ms [150.0000-600.0000]

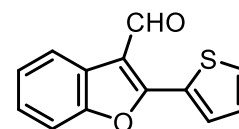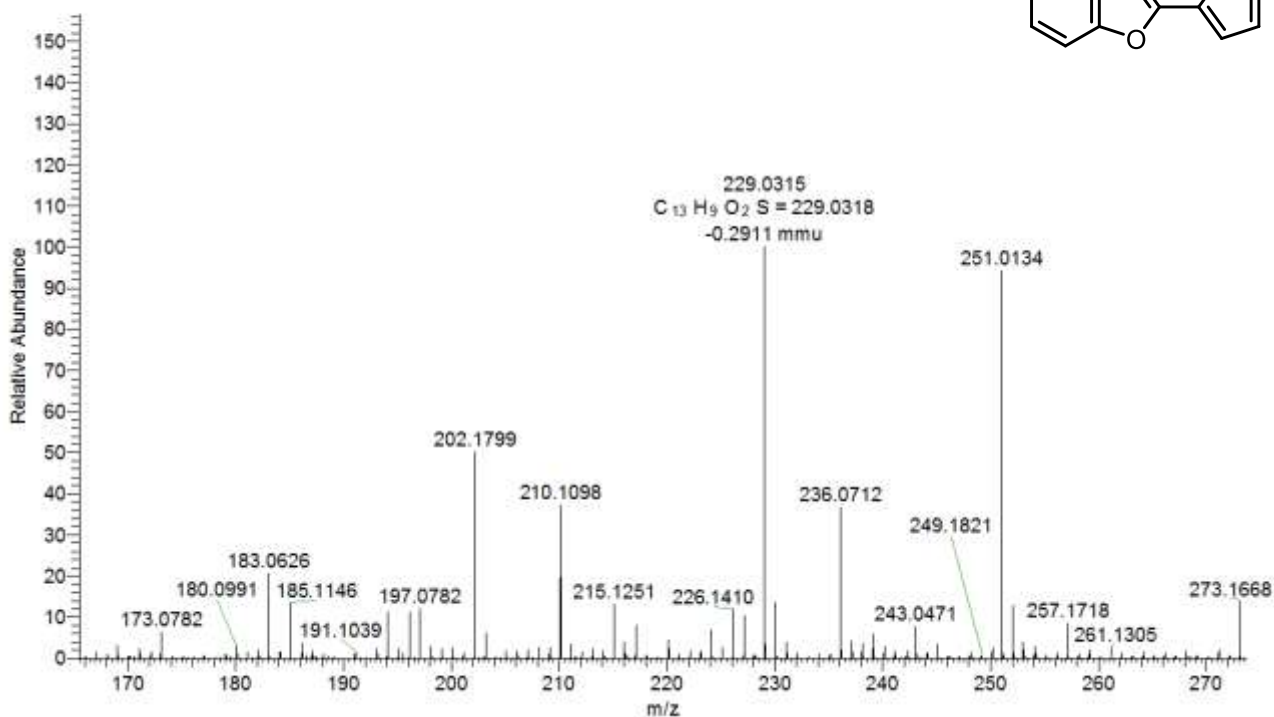

### HRMS (ESI) 5f

IKGM235 #22 RT: 0.12 AV: 1 NL: 4.30E7  
T: FTMS + p ESI Full ms [120.0000-1800.0000]

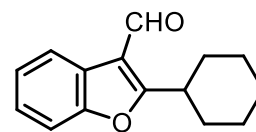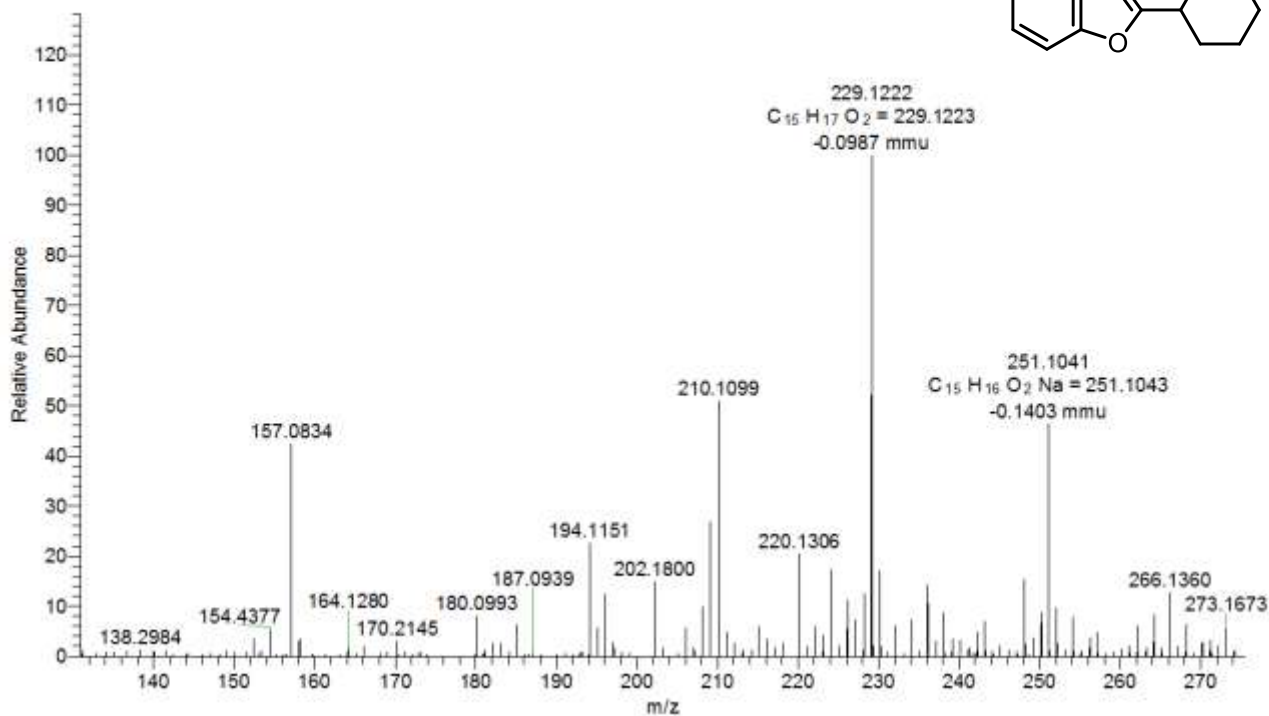

### HRMS (ESI) 5g

AN-B4g #12 RT: 0.10 AV: 1 NL: 2.85E5  
T: FTMS + p ESI Full ms [150.0000-600.0000]

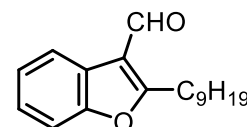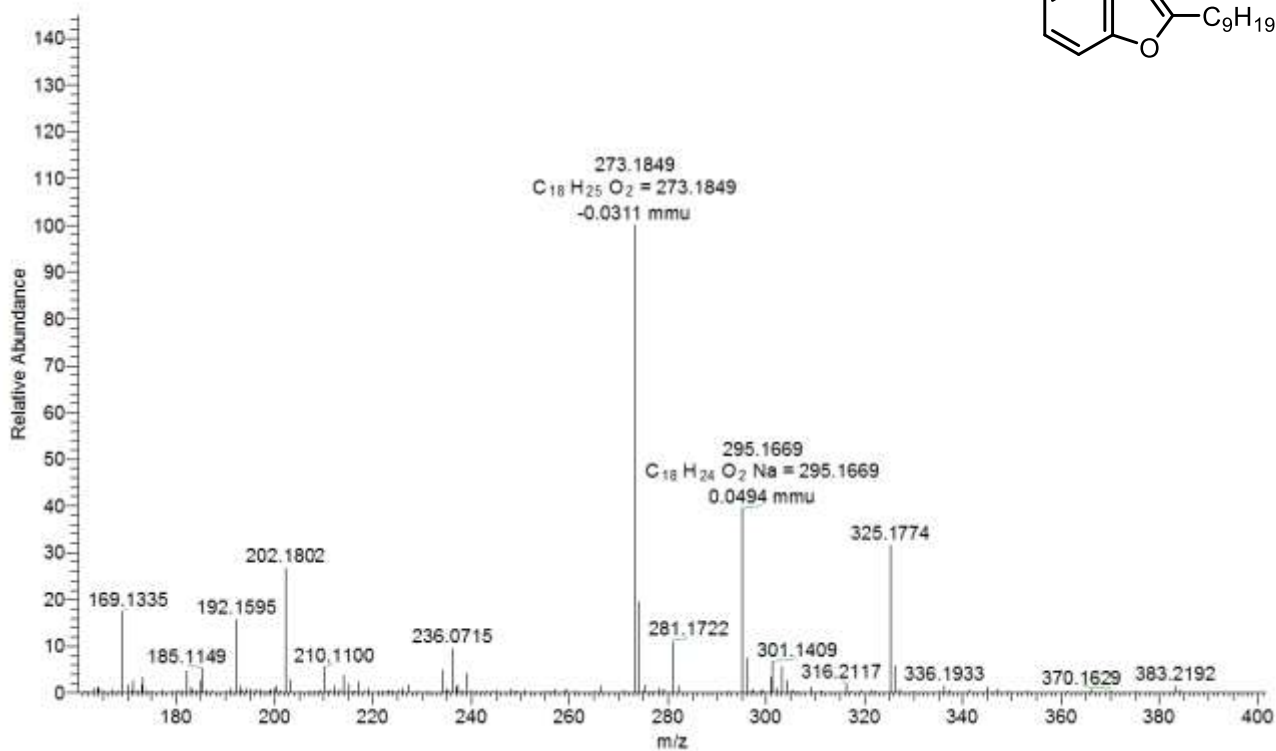

### HRMS (ESI) 7

IKGM-134 #20 RT: 0.11 AV: 1 NL: 1.44E9  
T: FTMS + p ESI Full ms [120.00-1800.00]

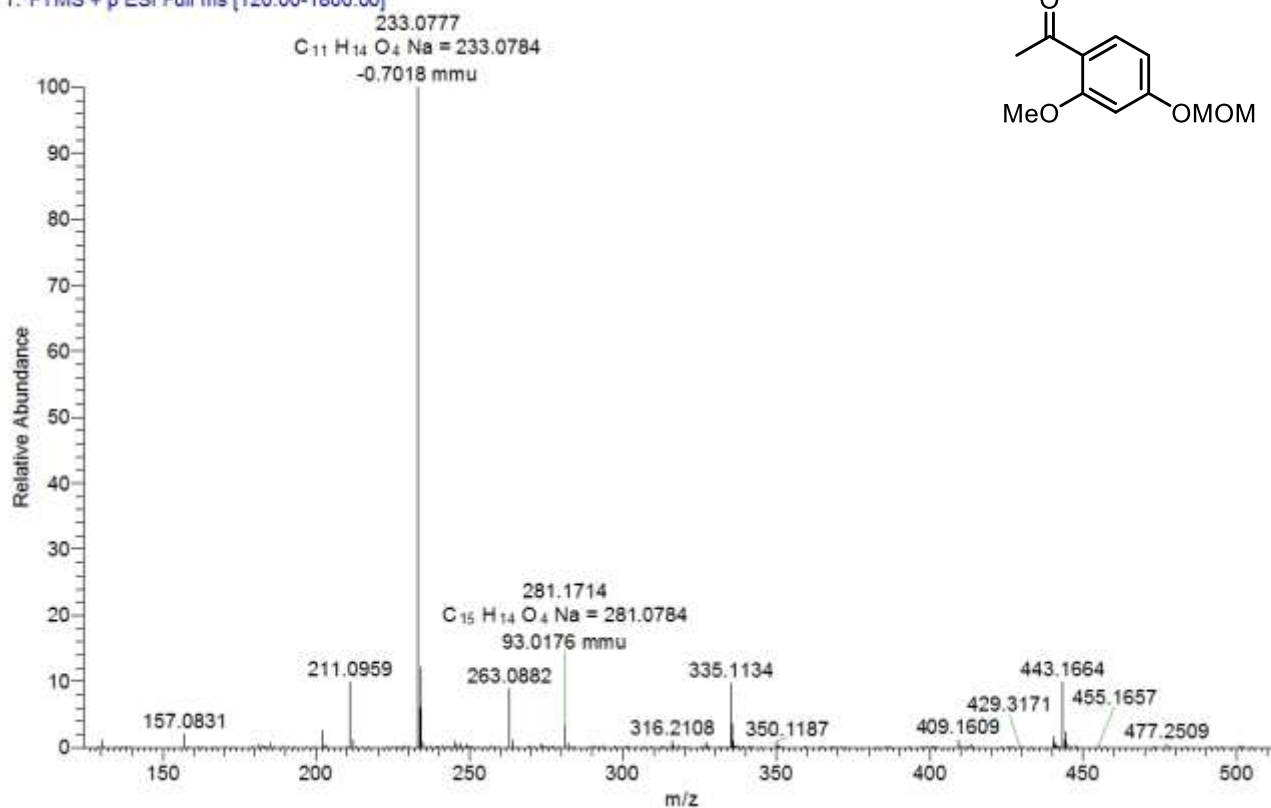

### HRMS (ESI) 8

IKGM-135 #23 RT: 0.12 AV: 1 NL: 9.30E8  
T: FTMS + p ESI Full ms [120.00-1800.00]

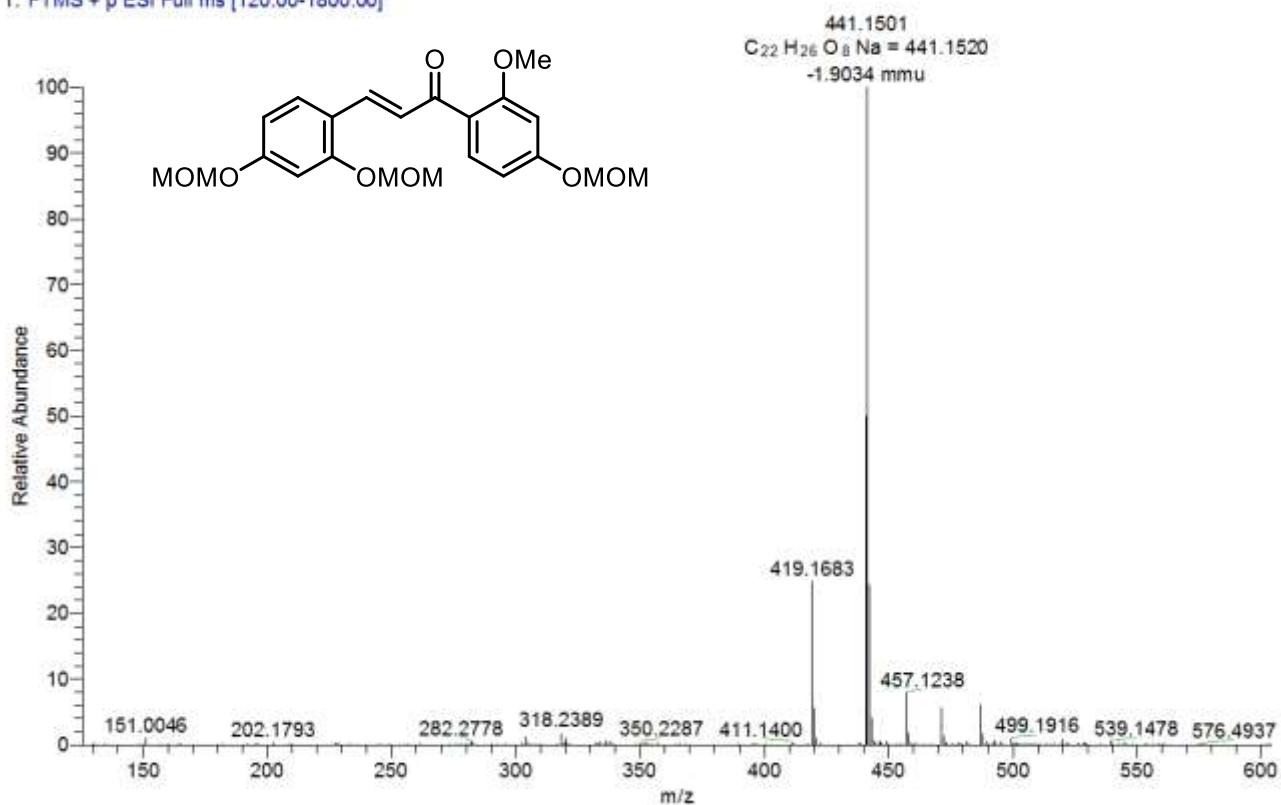



## HRMS (ESI) 9

IKGM148 #23 RT: 0.12 AV: 1 NL: 9.62E8  
T: FTMS + p ESI Full ms [120.00-1800.00]

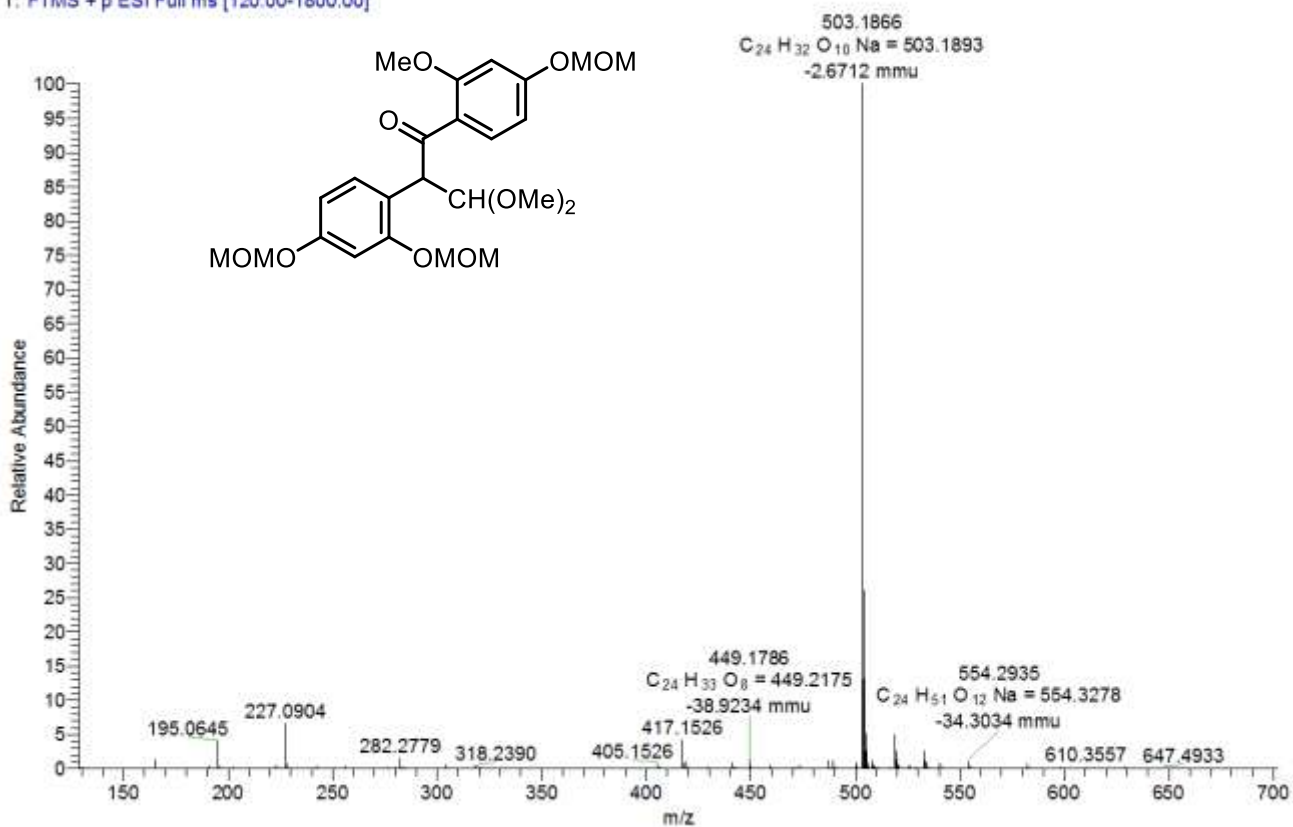

## HRMS (ESI) 10

AN-B12 #12 RT: 0.10 AV: 1 NL: 2.35E3  
T: FTMS + p ESI Full ms [150.0000-600.0000]

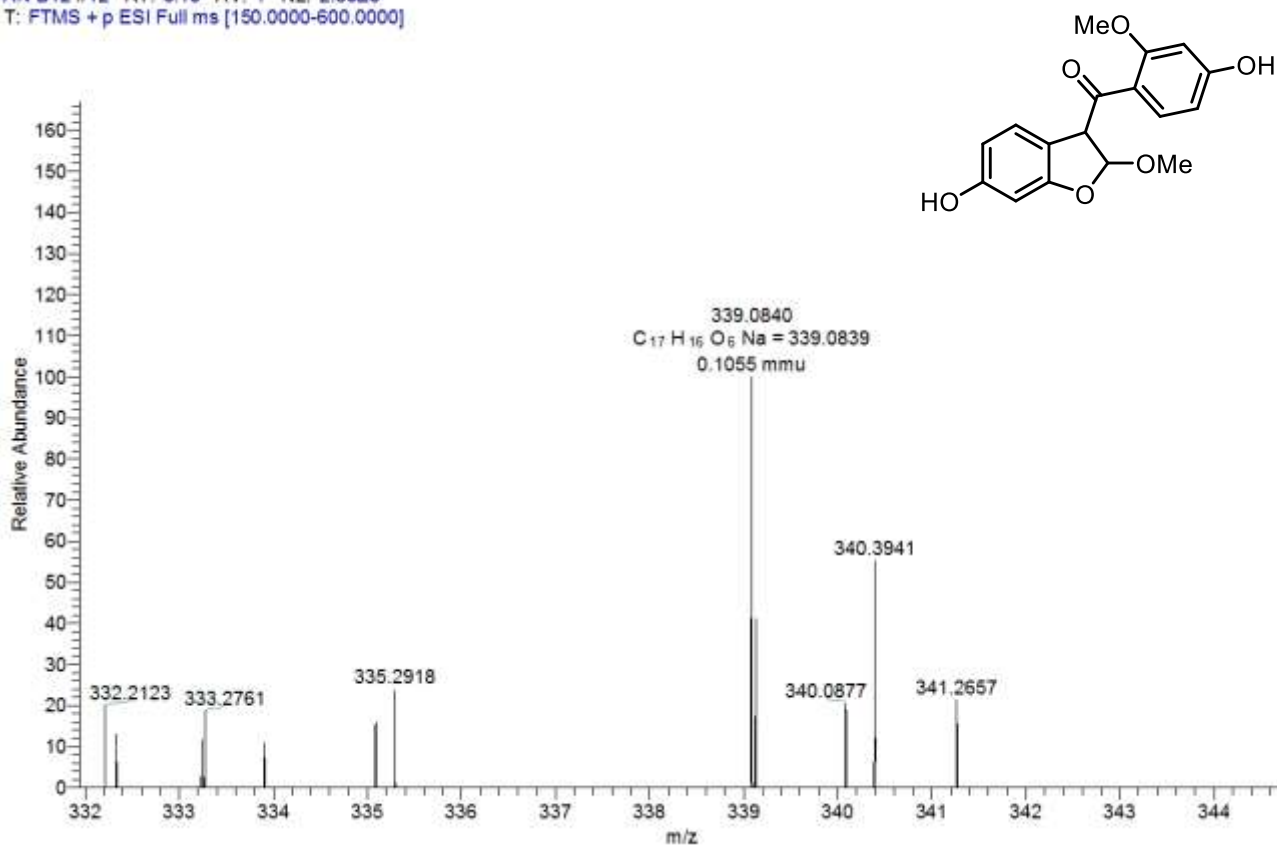

# HRMS (ESI) Puerariafuran

IKGM-Puerariafuran #14-16 RT: 0.08-0.09 AV: 3 NL: 1.91E8  
T: FTMS + p ESI Full ms [120.0000-1800.0000]

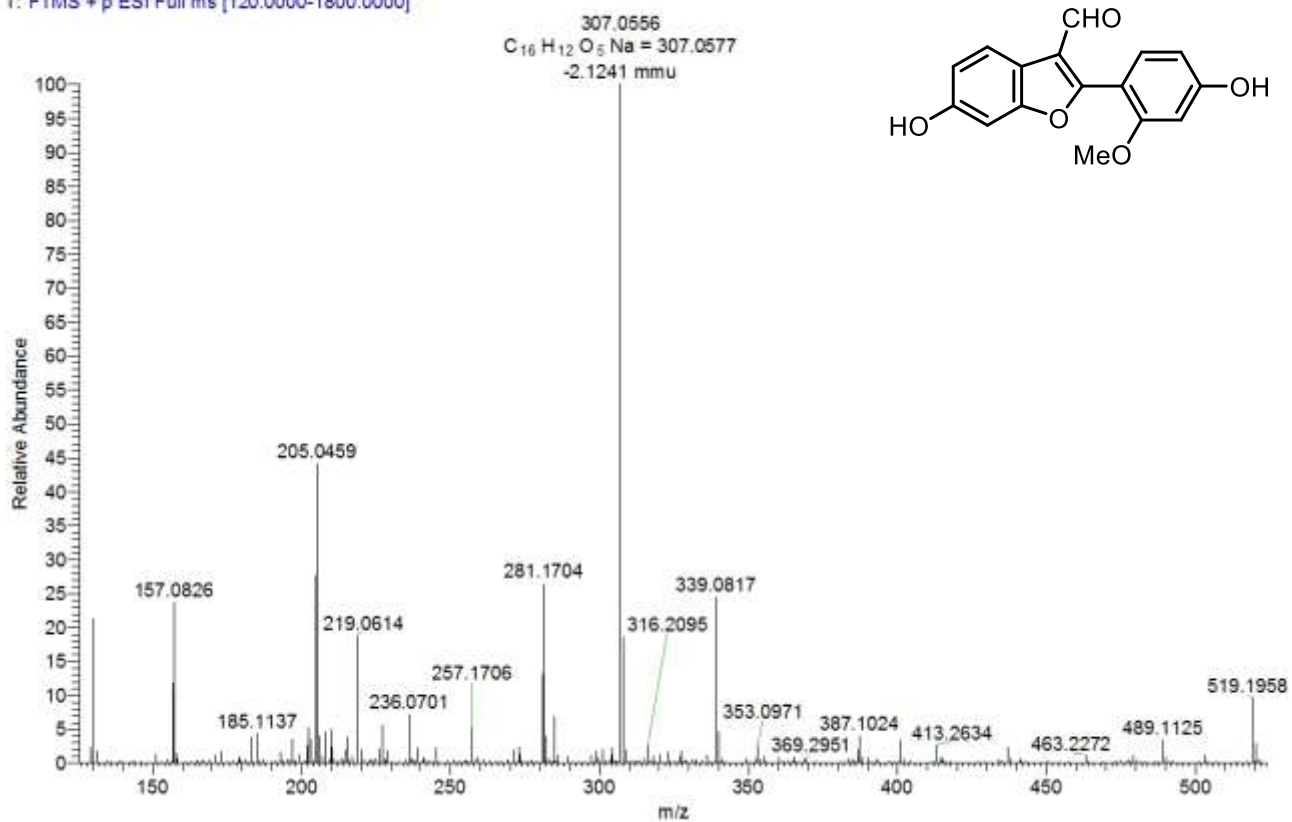

Supplement: d2ra06080a1.pdf [file d2ra06080a1.pdf]
